# Supplementary material for: Label-free serum proteomics for the identification of the putative biomarkers of postoperative pain in patients with gastric cancer
Source: Royal Society of Chemistry journal article supplement (doi:10.1039/d2mo00296e), 2023-02-27
Supplement: d2mo00296e1.pdf [file d2mo00296e1.pdf]

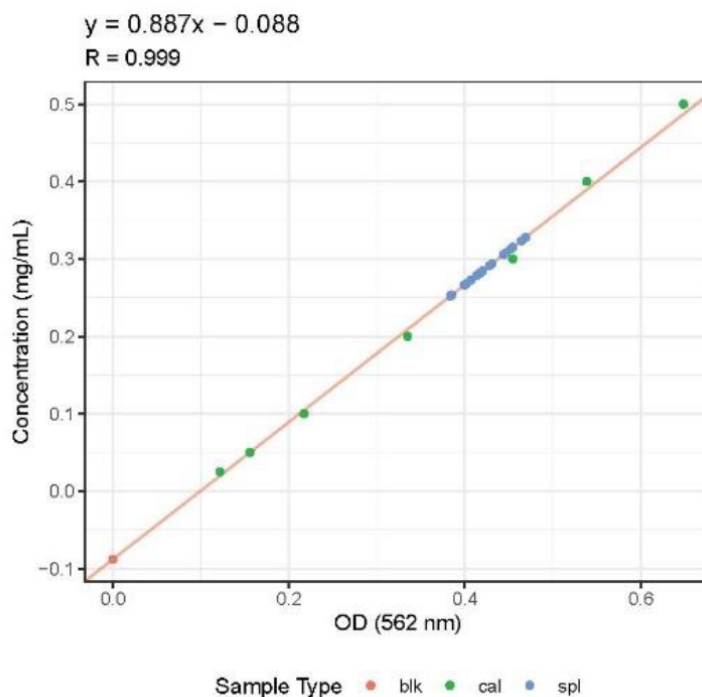

**Fig. S1** The protein concentration of all samples

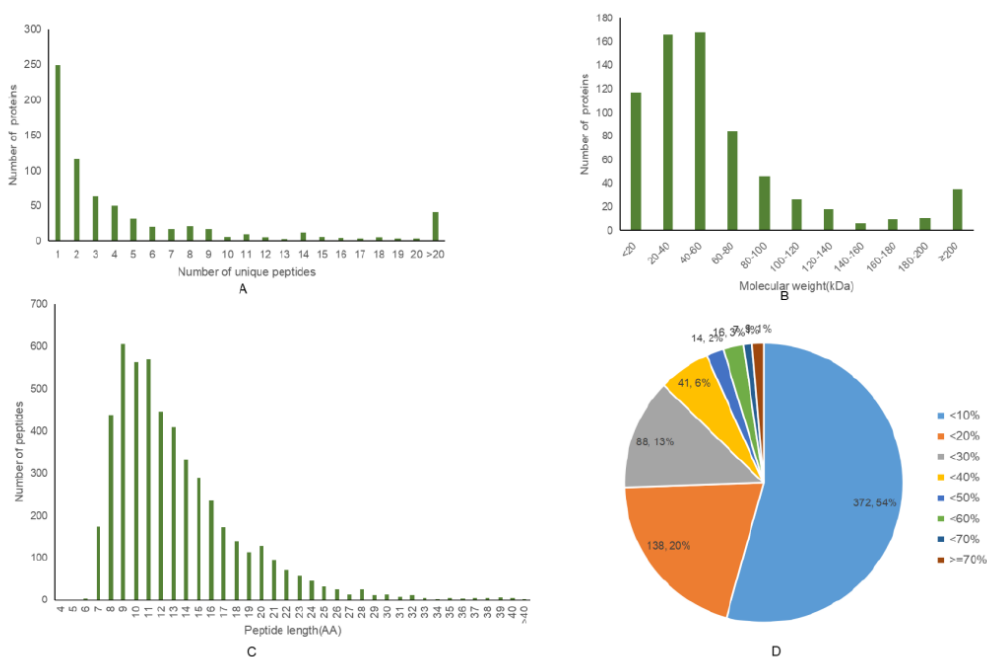

**Fig. S2** The summary of proteins and peptides. A. The number of proteins and peptides. B. The distribution of molecular weight. C. The distribution of peptide length. D. The peptide coverage for protein identification.

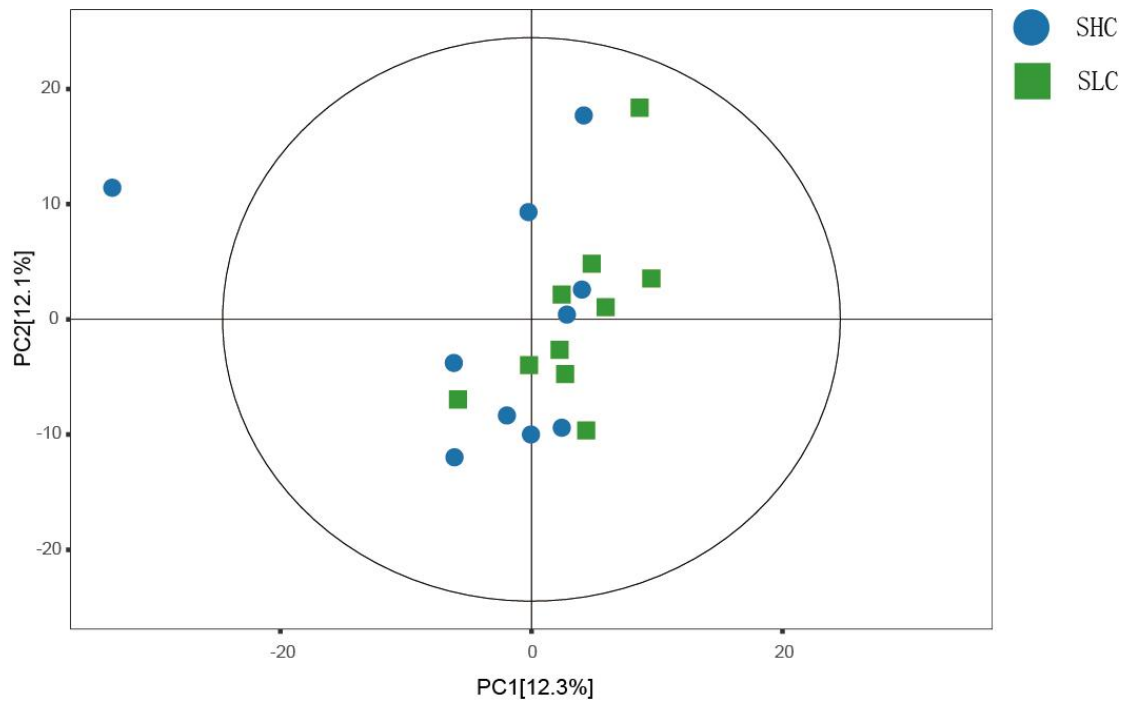

**Fig. S3** The PCA model of SHC and SLC groups.

**Table S1.** Differential proteins as regressors of BMI.

| Variables | Accession | VIPpred | p(corr) |
|-----------|-----------|---------|---------|
| IGFBP2    | P18065    | 3.12    | -0.23   |
| ANGPTL8   | Q6UXH0    | 2.08    | 0.15    |
| CFL1      | P23528    | 1.44    | -0.10   |
| LYZ       | P61626    | 1.23    | -0.09   |

R2=0.787, Q2=0.093, CV-ANOVA P-value: 0.96
