# Supplementary material for: Label-free serum proteomics for the identification of the putative biomarkers of postoperative pain in patients with gastric cancer
Source: Royal Society of Chemistry journal article supplement (doi:10.1039/d2mo00296e), 2023-02-27
Supplement: d2mo00296e2.pdf [file d2mo00296e2.pdf]

### The TIC&BPC of samples.

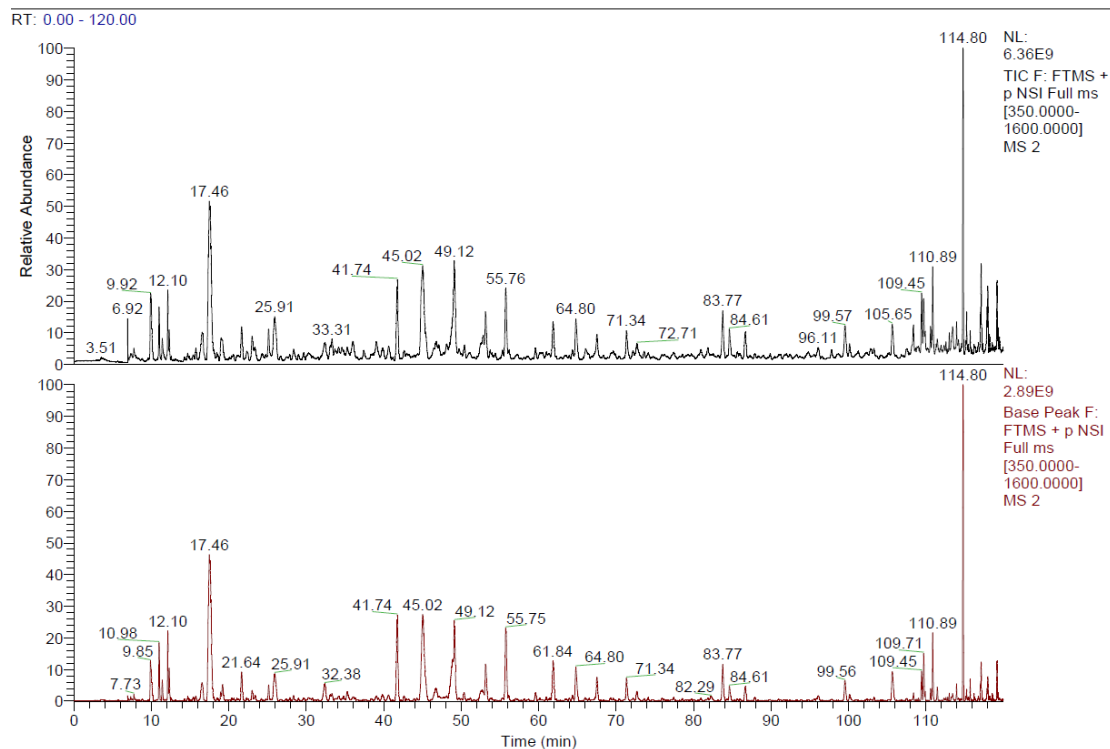

SLC-1

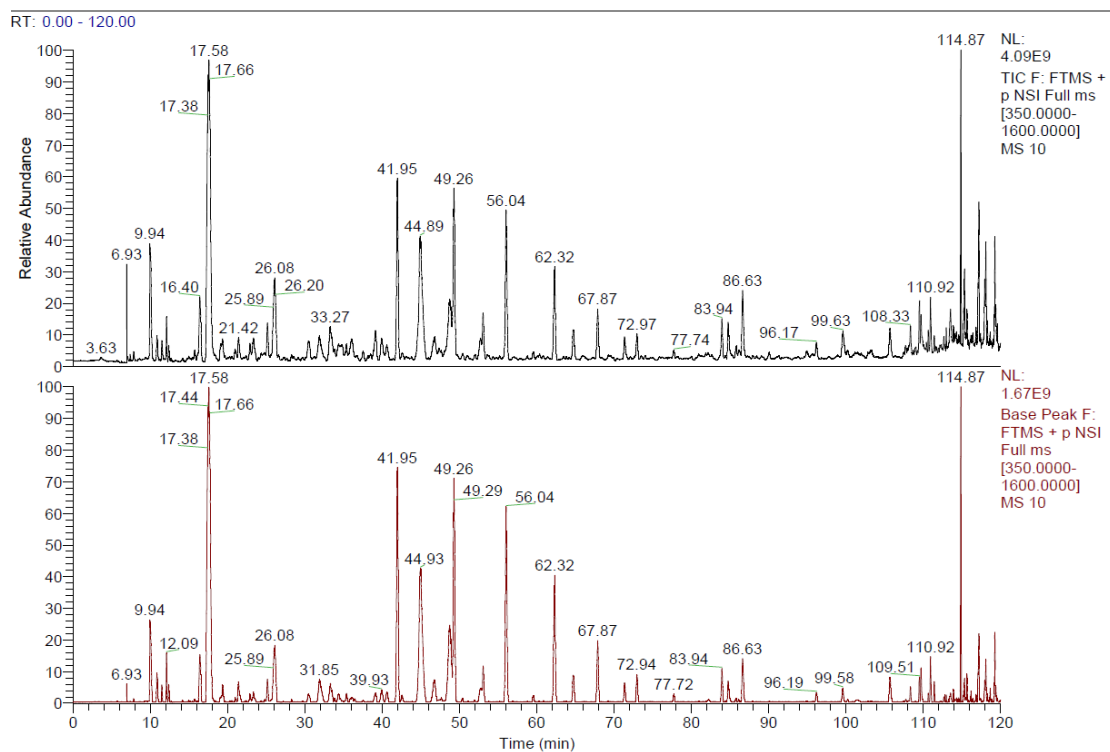

SLC-2

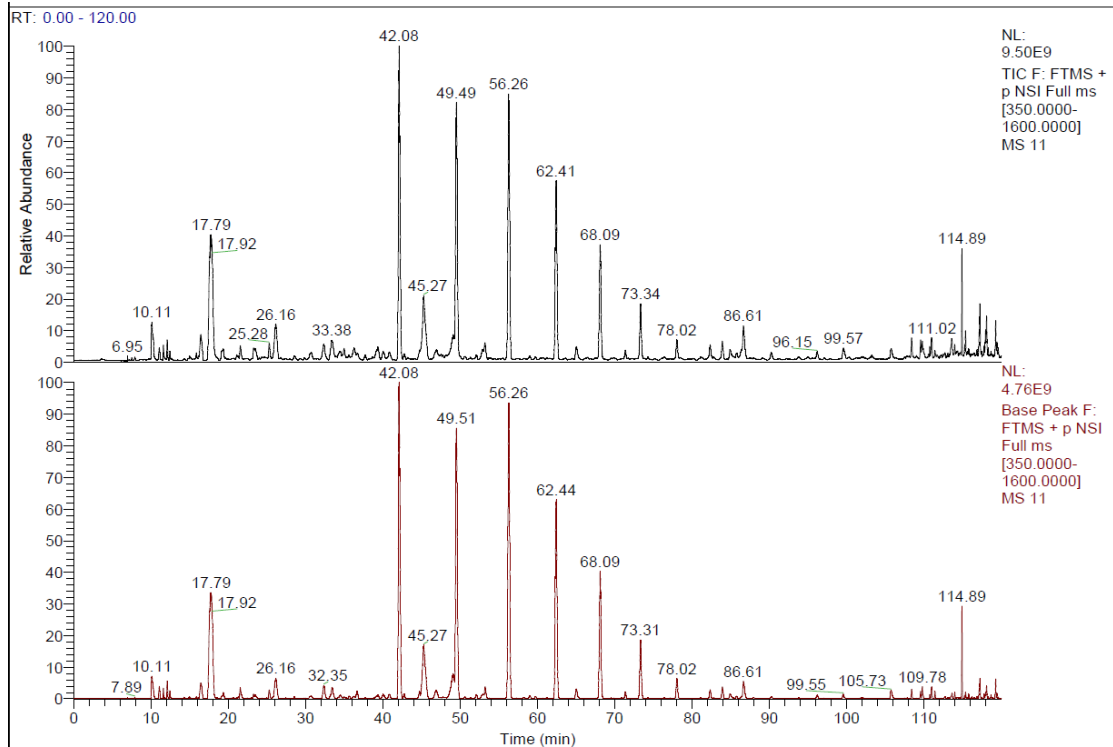

SLC-3

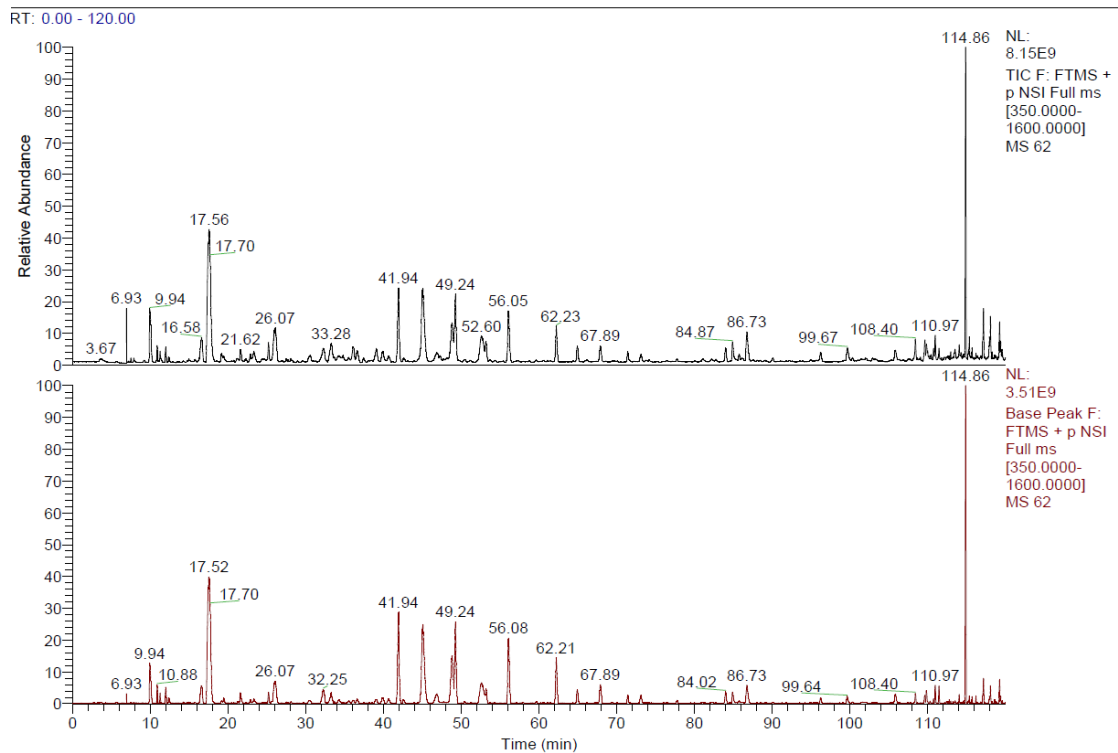

SLC-4

RT: 0.00 - 120.00

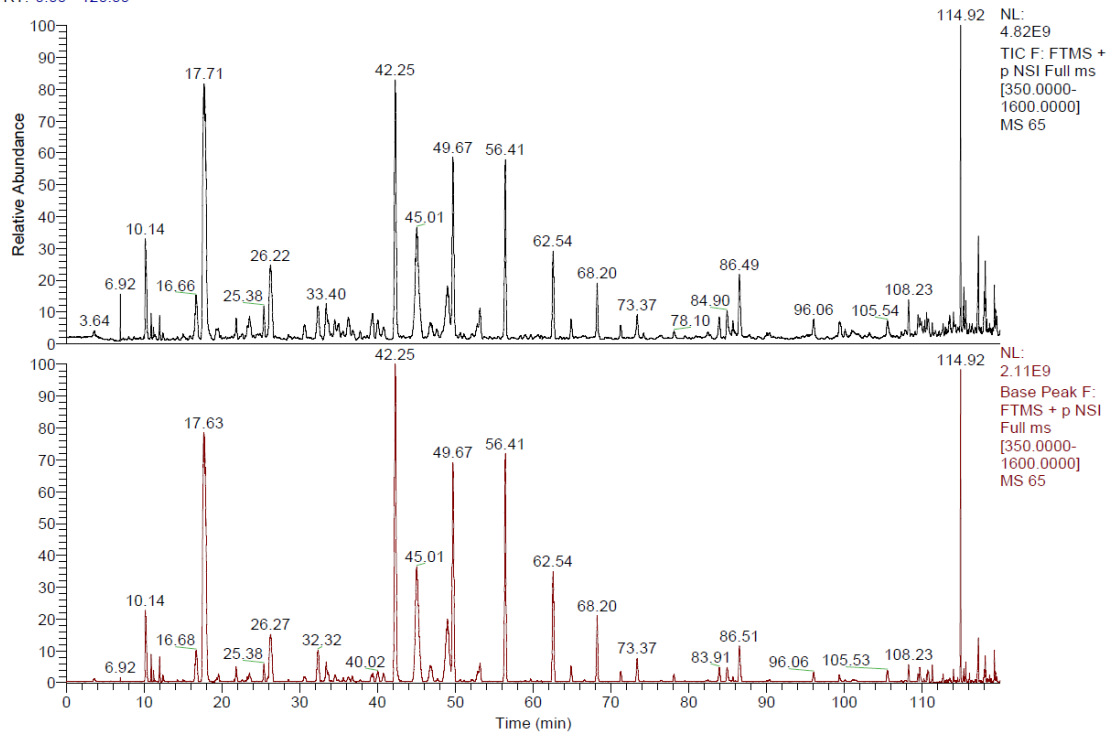

SLC-5

RT: 0.00 - 120.00

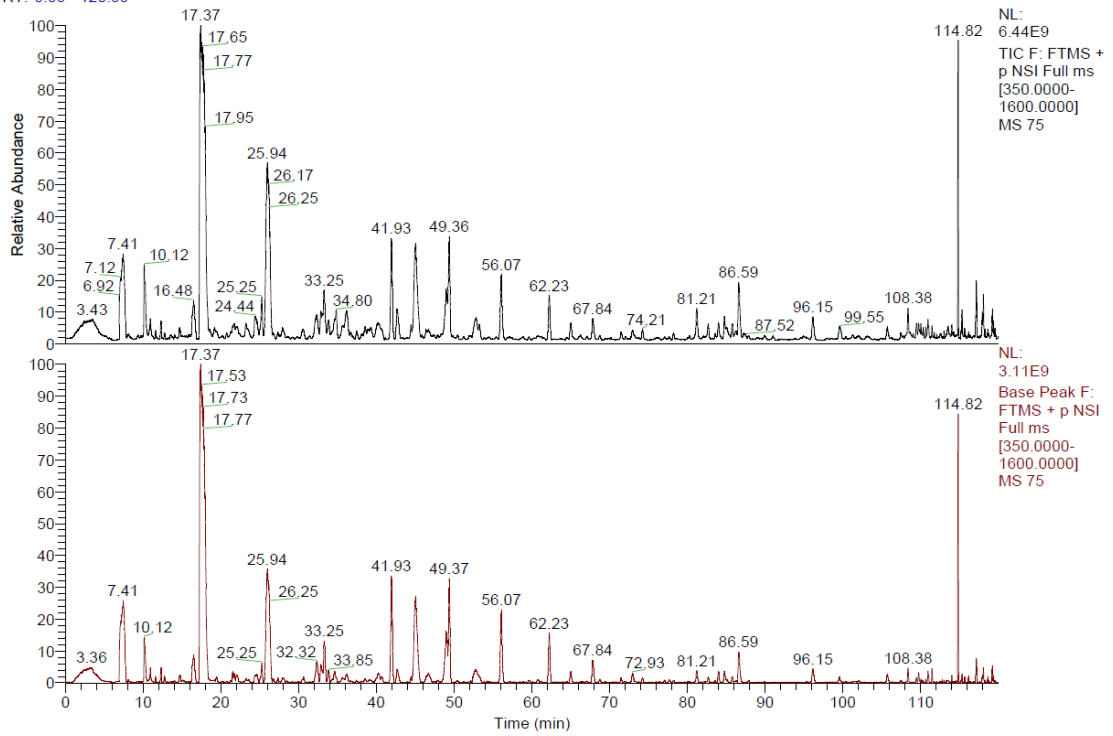

SLC-6

RT: 0.00 - 120.00

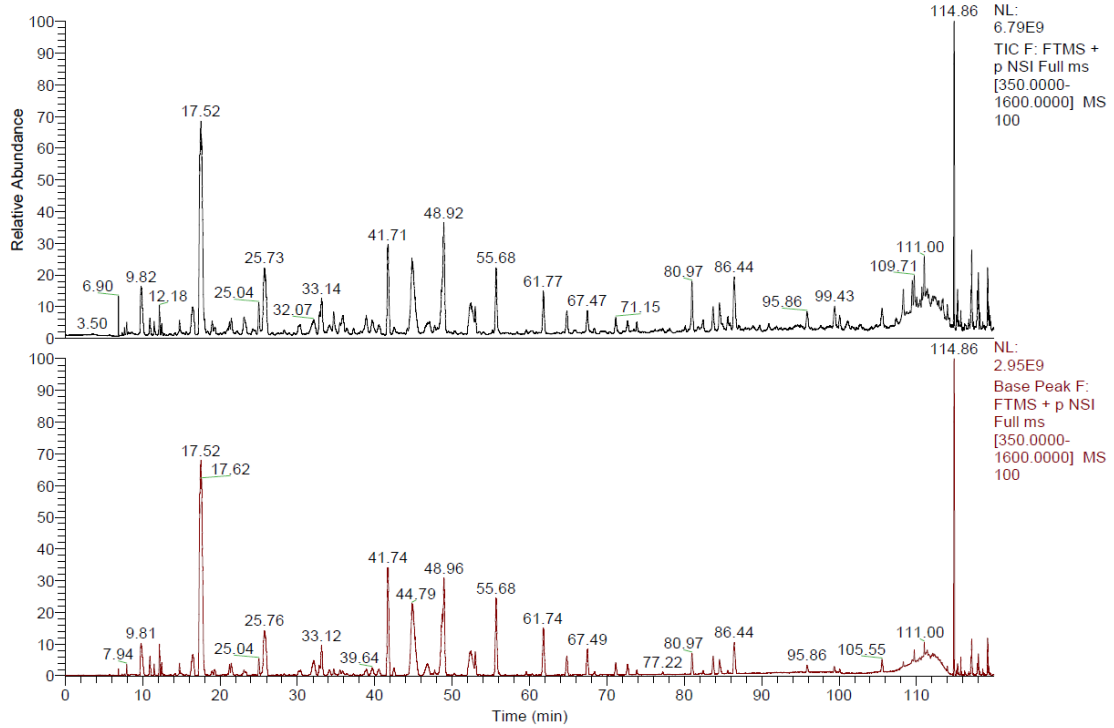

SLC-7

RT: 0.00 - 120.00

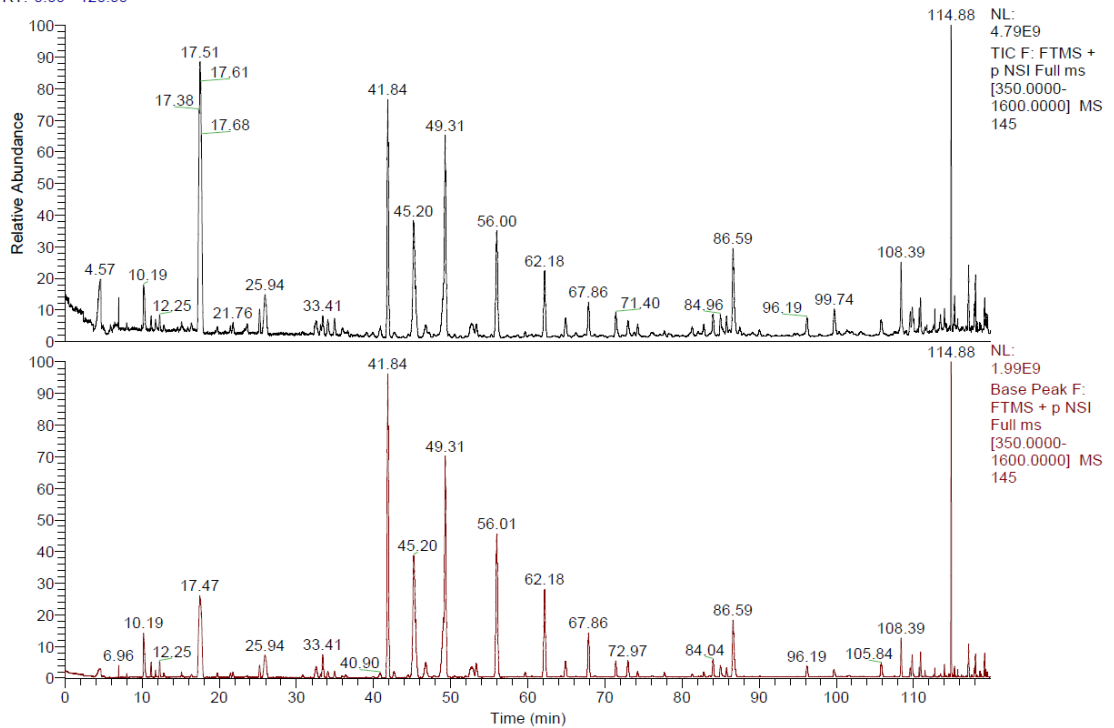

SLC-8

RT: 0.00 - 120.00

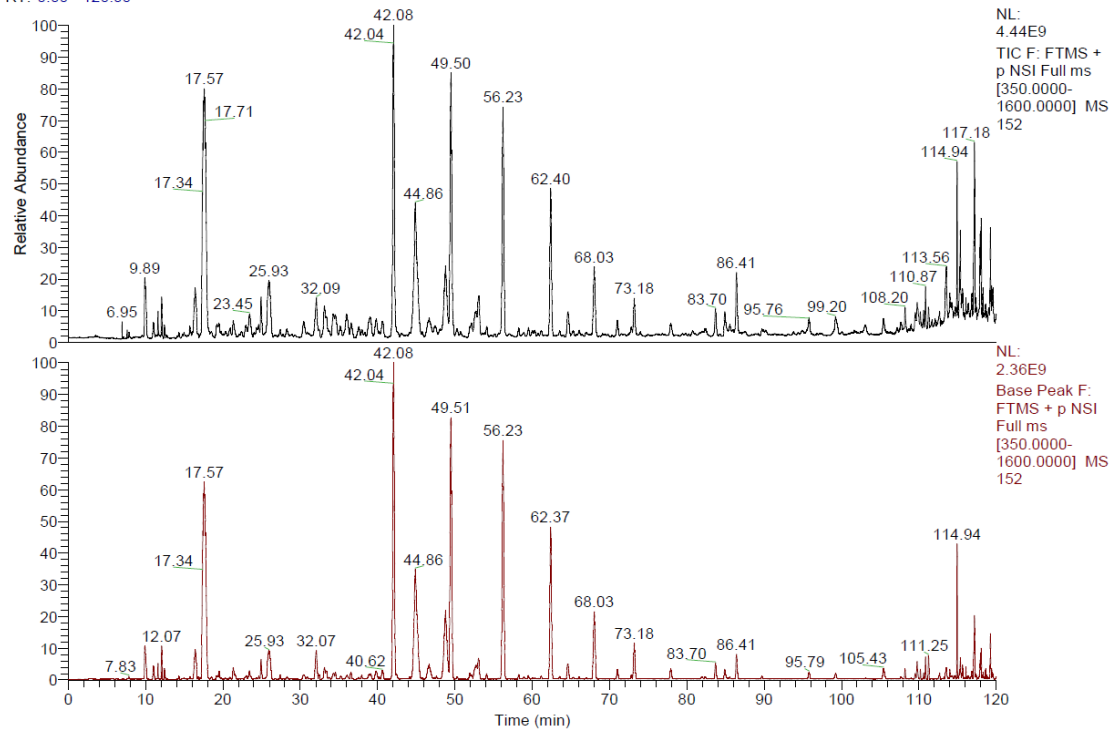

SLC-9

RT: 0.00 - 120.00

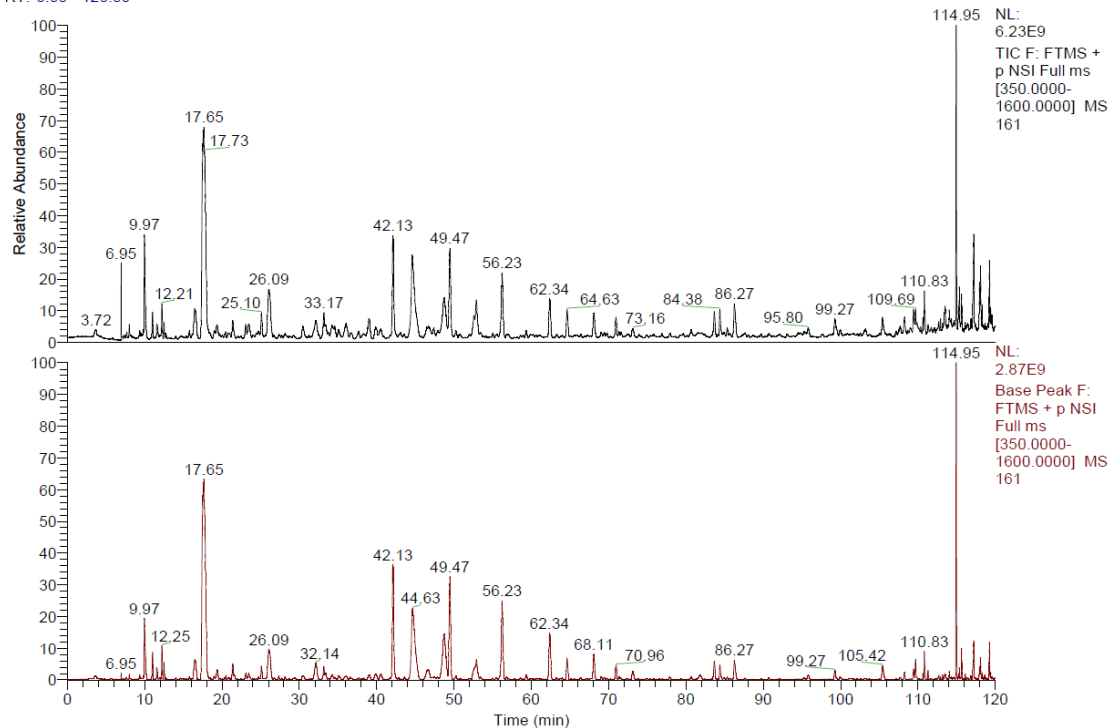

SLC-10

RT: 0.00 - 120.00

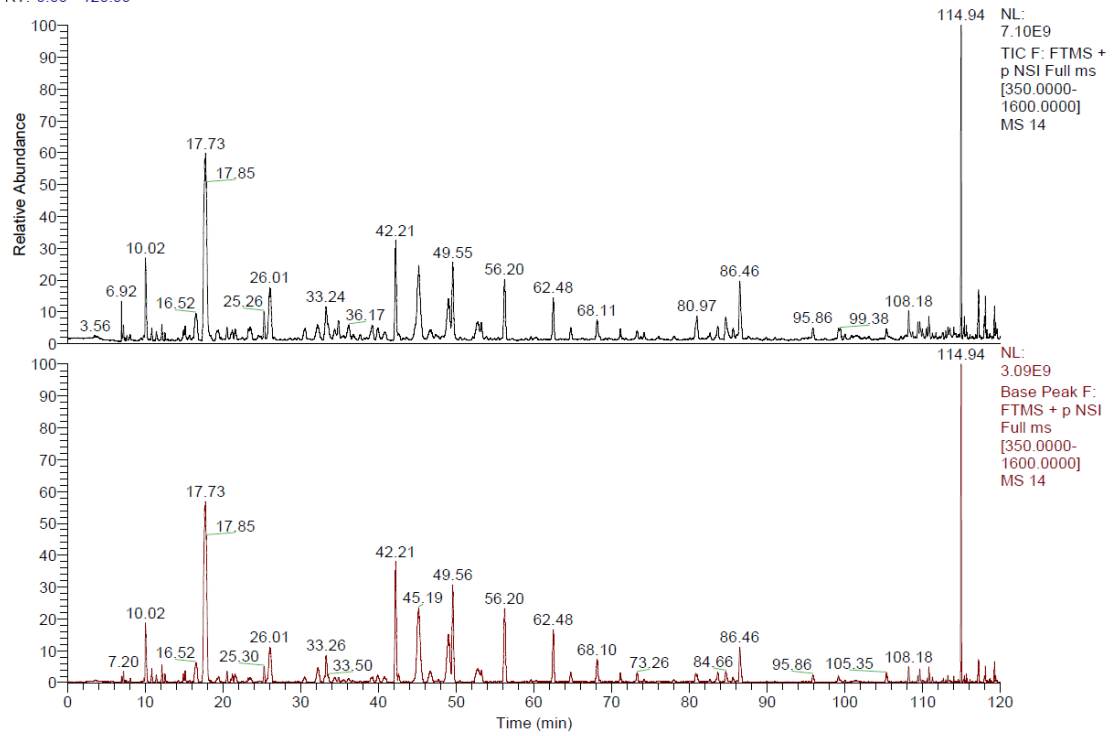

SHC-1

RT: 0.00 - 120.00

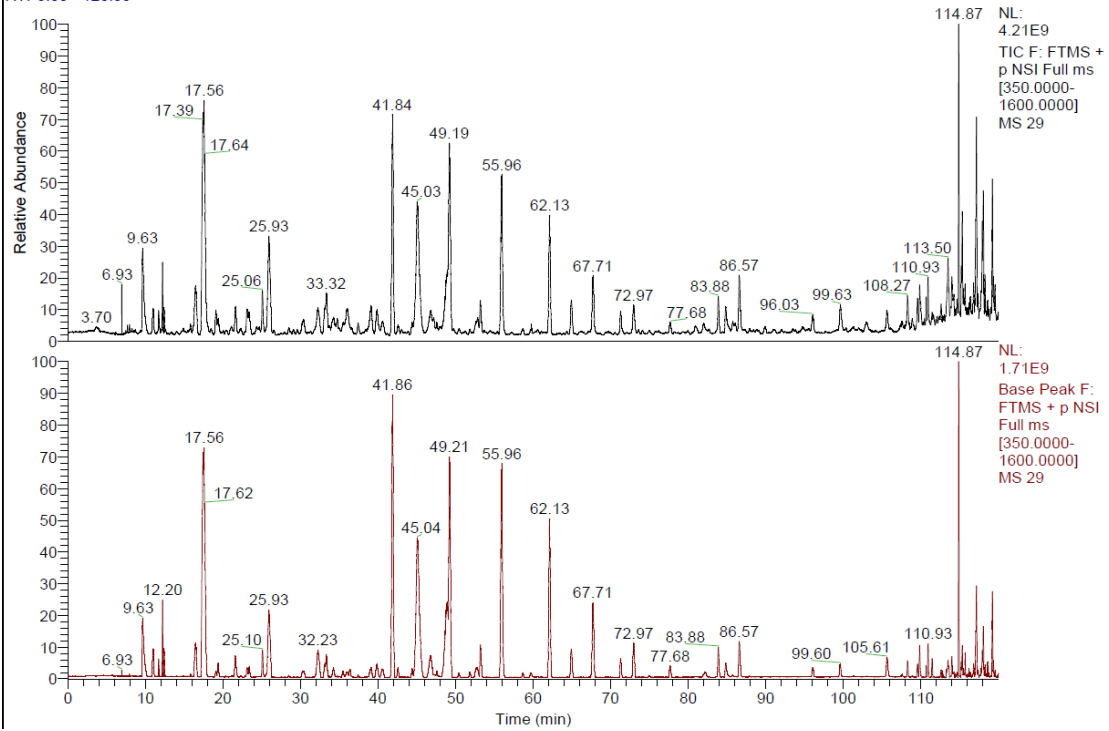

SHC-2

RT: 0.00 - 120.00

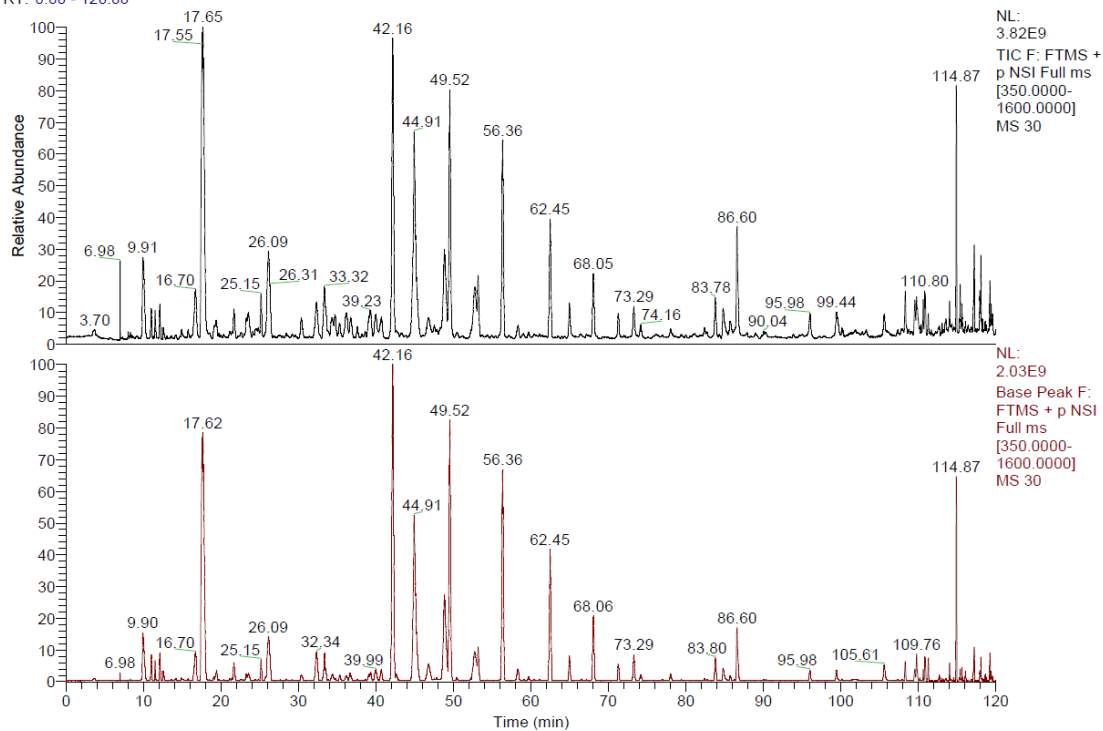

SHC-3

RT: 0.00 - 120.00

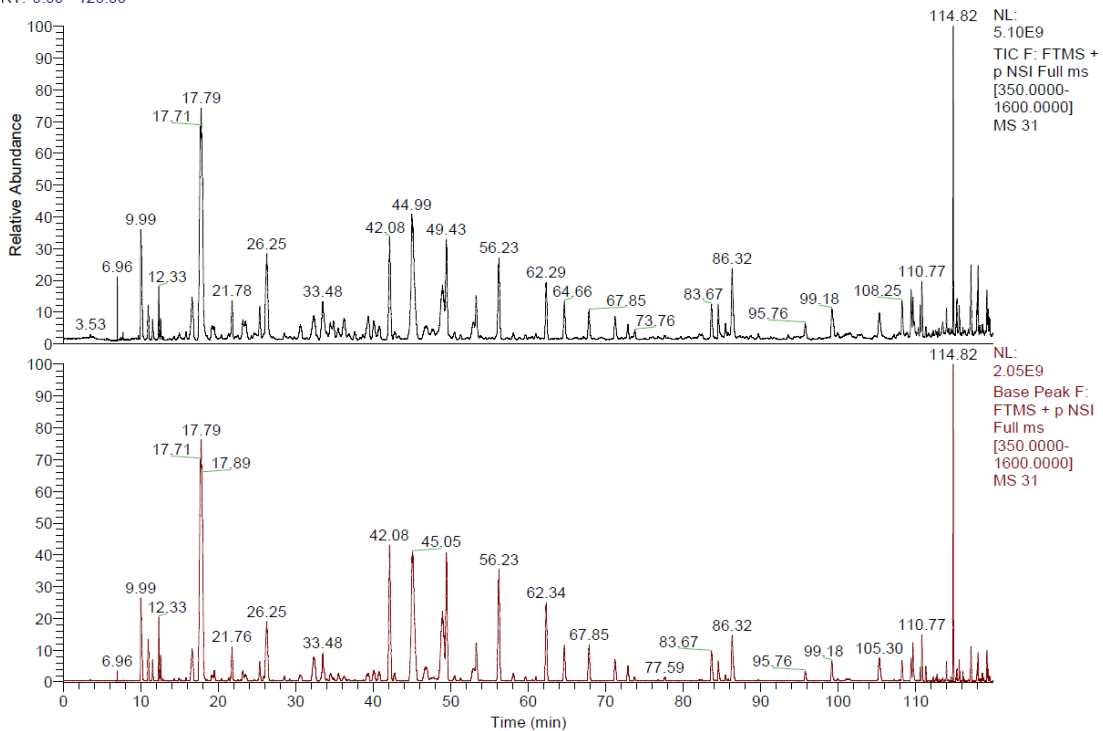

SHC-4

RT: 0.00 - 120.00

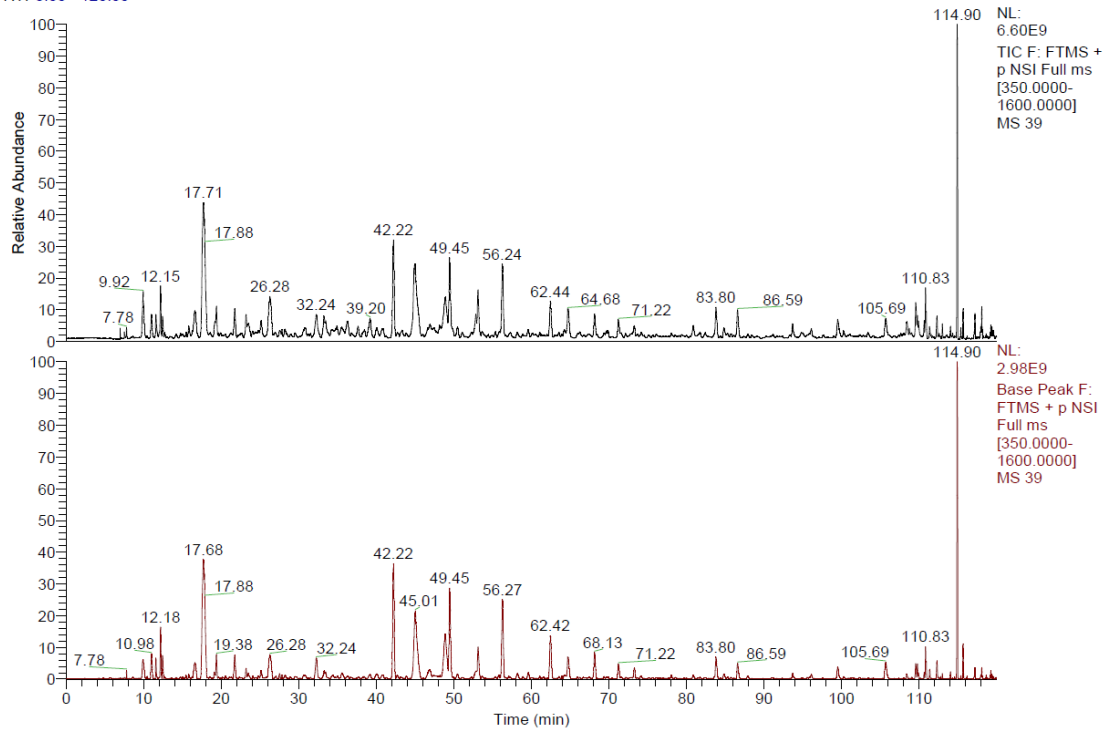

### SHC-5

RT: 0.00 - 120.00

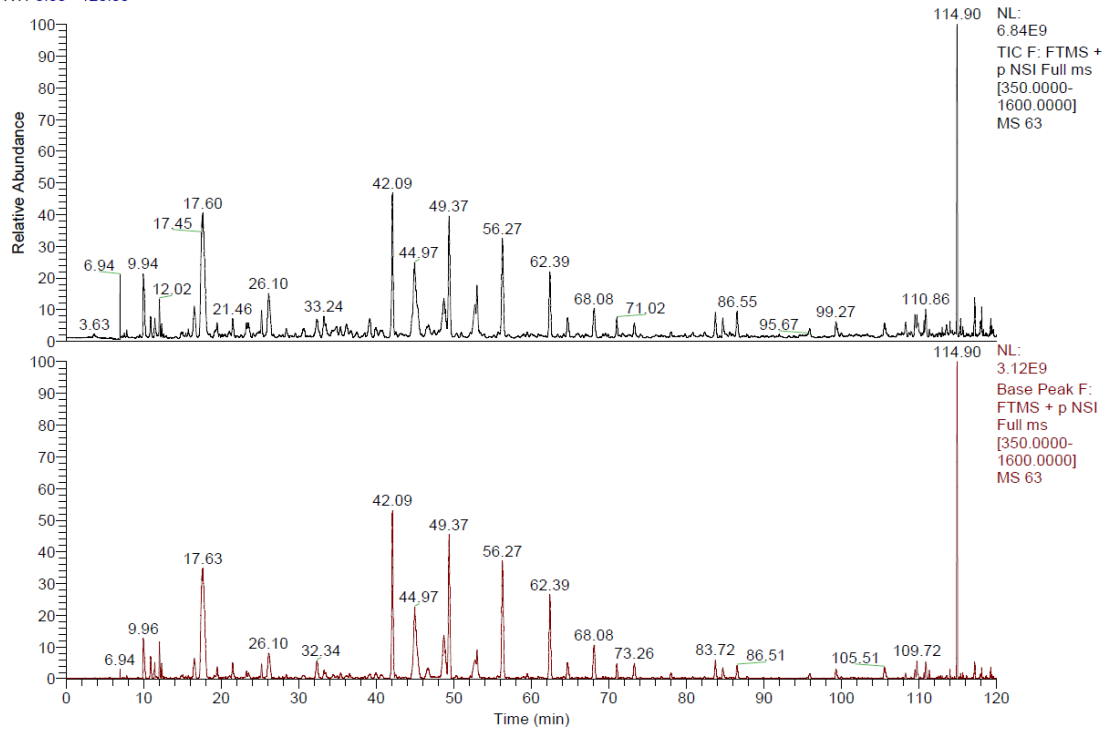

### SHC-6



RT: 0.00 - 120.00

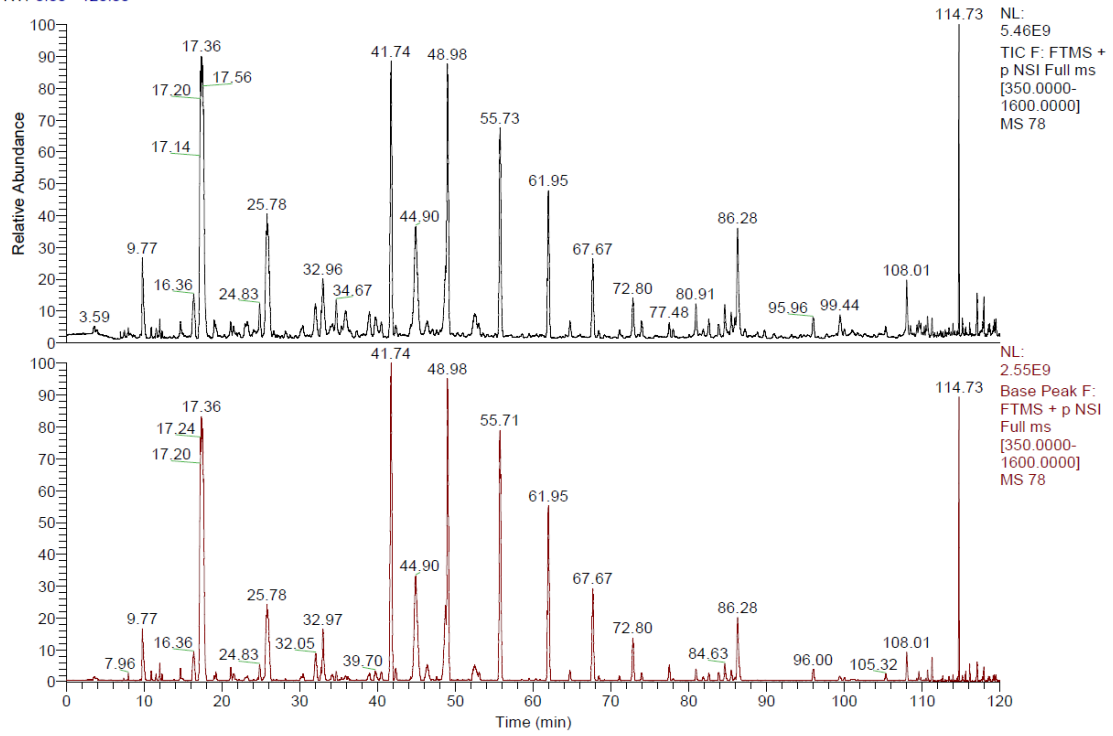

### SHC-7

RT: 0.00 - 120.00

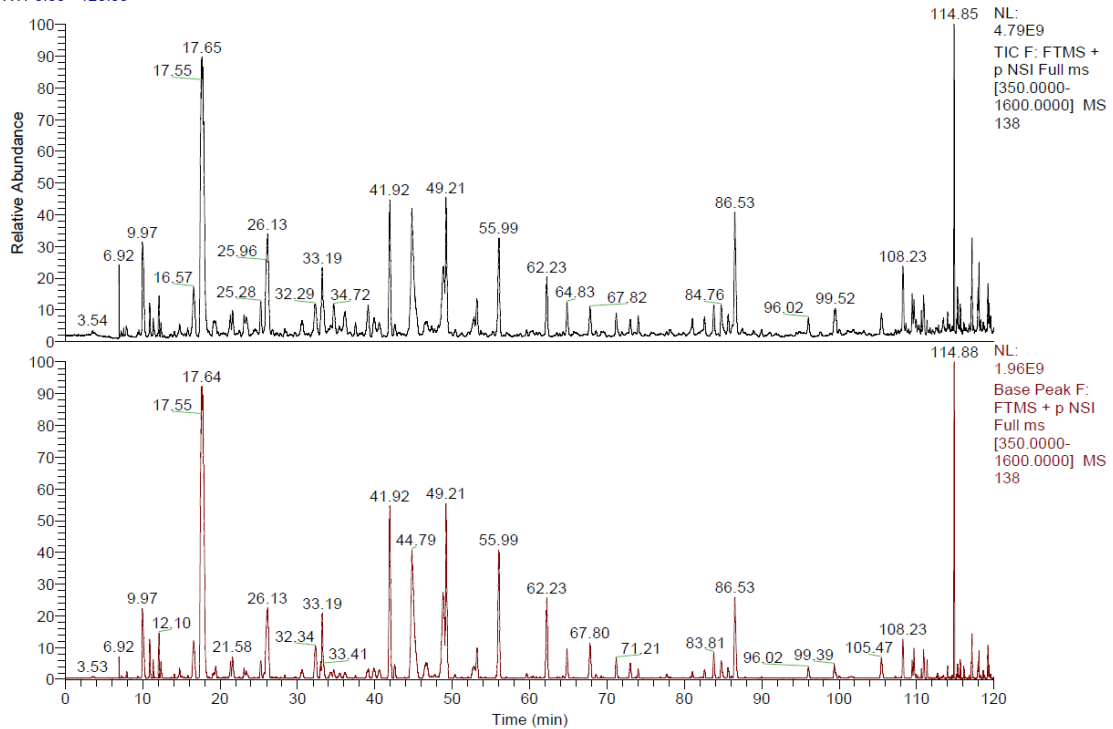

### SHC-8

RT: 0.00 - 120.00

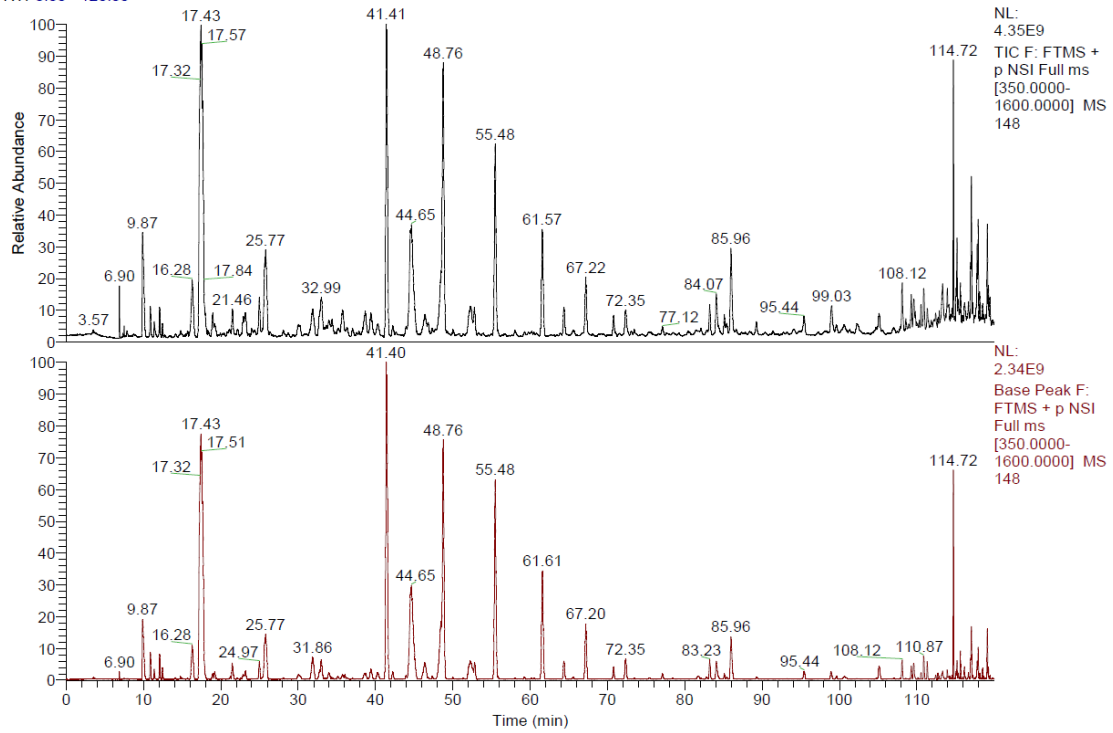

### SHC-9

RT: 0.00 - 120.00

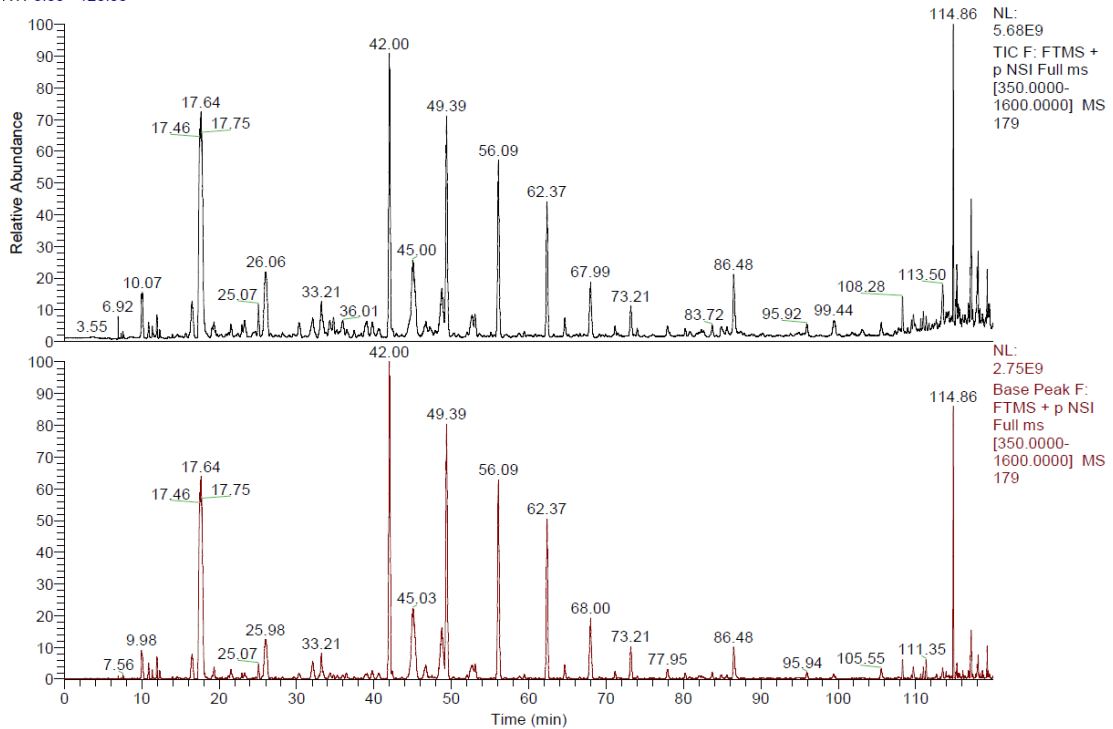

### SHC-10
