# Supplementary material for: Label-free serum proteomics for the identification of the putative biomarkers of postoperative pain in patients with gastric cancer
Source: Royal Society of Chemistry journal article supplement (doi:10.1039/d2mo00296e), 2023-02-27
Supplement: d2mo00296e3.xlsx [file d2mo00296e3.xlsx]

## Sheet: SLC_vs_SHC
GeneName	Accession	Description	#.Unique.Peptides	MEAN SLC	MEAN SHC	normalized_SLC_1	normalized_SLC_2	normalized_SLC_3	normalized_SLC_4	normalized_SLC_5	normalized_SLC_6	normalized_SLC_7	normalized_SLC_8	normalized_SLC_9	normalized_SLC_10	normalized_SHC_1	normalized_SHC_2	normalized_SHC_3	normalized_SHC_4	normalized_SHC_5	normalized_SHC_6	normalized_SHC_7	normalized_SHC_8	normalized_SHC_9	normalized_SHC_10
ALDH16A1	Q8IZ83	Aldehyde dehydrogenase family 16 member A1 OS=Homo sapiens OX=9606 GN=ALDH16A1 PE=1 SV=2	3	2870.42	135128	2870.42	2870.42	2870.42	2870.42	2870.42	2870.42	2870.42	2870.42	2870.42	2870.42	287425	595333	35943.5	2870.42	175228	82950	20814.6	85423.6	62424.1	2870.42
ALAD	P13716	Delta-aminolevulinic acid dehydratase OS=Homo sapiens OX=9606 GN=ALAD PE=1 SV=1	2	330486	102111	2870.42	2870.42	936078	263363	126781	130628	1.50036e+06	52265.9	2870.42	286778	2870.42	2870.42	2870.42	2870.42	2870.42	2870.42	2870.42	2870.42	995278	2870.42
MARCKS	P29966	Myristoylated alanine-rich C-kinase substrate OS=Homo sapiens OX=9606 GN=MARCKS PE=1 SV=4	3	14224.8	105598	2870.42	2870.42	2870.42	2870.42	2870.42	109391	2870.42	2870.42	2870.42	9893.66	560921	83241.6	41551.8	11316.9	2870.42	13102	174681	2870.42	136878	28549.2
MAT2B	Q9NZL9	Methionine adenosyltransferase 2 subunit beta OS=Homo sapiens OX=9606 GN=MAT2B PE=1 SV=1	1	8999.81	58821	2870.42	2870.42	28892.3	2870.42	2870.42	38142.4	2870.42	2870.42	2870.42	2870.42	284973	44107.3	46555.8	43175.2	2870.42	44168.6	41296.8	2870.42	49807.2	28384.6
PAFAH1B3	Q15102	Platelet-activating factor acetylhydrolase IB subunit gamma OS=Homo sapiens OX=9606 GN=PAFAH1B3 PE=1 SV=1	1	31196.6	2870.42	26960.5	2870.42	84791.3	29544.8	2870.42	2870.42	129355	2870.42	2870.42	26962.2	2870.42	2870.42	2870.42	2870.42	2870.42	2870.42	2870.42	2870.42	2870.42	2870.42
LYZ	P61626	Lysozyme C OS=Homo sapiens OX=9606 GN=LYZ PE=1 SV=1	2	58837	154168	256752	2870.42	104684	2870.42	2870.42	42238.9	2870.42	2870.42	104816	65527.7	77231.4	359487	282311	120790	69266.6	293391	99360	78869.3	102538	58430.8
F13B	P05160	Coagulation factor XIII B chain OS=Homo sapiens OX=9606 GN=F13B PE=1 SV=3	4	1.63735e+06	210309	758373	5.7205e+06	2.27088e+06	912246	1.63436e+06	497843	2.08496e+06	1.81104e+06	2870.42	680461	2870.42	139296	2870.42	2870.42	2870.42	220736	806997	918843	2870.42	2870.42
H3-3A	P84243	Histone H3.3 OS=Homo sapiens OX=9606 GN=H3-3A PE=1 SV=2	2	26297.7	272905	2870.42	2870.42	2870.42	2870.42	51143	111302	2870.42	2870.42	2870.42	80438.4	1.75464e+06	278045	2870.42	2870.42	66577.2	116945	273404	77438.9	74680.5	81576.5
STIP1	P31948	Stress-induced-phosphoprotein 1 OS=Homo sapiens OX=9606 GN=STIP1 PE=1 SV=1	1	89343	34720.8	39748.3	2870.42	236751	77544.7	46991.6	2870.42	344418	38999	28614.3	74621.4	2870.42	2870.42	29334.2	2870.42	2870.42	2870.42	38742.1	2870.42	259039	2870.42
SDF4	Q9BRK5	45 kDa calcium-binding protein OS=Homo sapiens OX=9606 GN=SDF4 PE=1 SV=1	1	38579.2	117138	103134	2870.42	138009	2870.42	2870.42	2870.42	124556	2870.42	2870.42	2870.42	92437.2	123784	132013	84458.5	107742	298353	2870.42	2870.42	198308	128547
PGRMC1	O00264	Membrane-associated progesterone receptor component 1 OS=Homo sapiens OX=9606 GN=PGRMC1 PE=1 SV=3	1	59009.7	169928	91124	2870.42	254399	2870.42	224481	2870.42	2870.42	2870.42	2870.42	2870.42	2870.42	252406	203496	2870.42	182050	125500	329302	236438	193919	170428
TPSAB1	Q15661	Tryptase alpha/beta-1 OS=Homo sapiens OX=9606 GN=TPSAB1 PE=1 SV=1	1	2870.42	181684	2870.42	2870.42	2870.42	2870.42	2870.42	2870.42	2870.42	2870.42	2870.42	2870.42	245529	2870.42	697699	314275	542114	2870.42	2870.42	2870.42	2870.42	2870.42
TPP1	O14773	Tripeptidyl-peptidase 1 OS=Homo sapiens OX=9606 GN=TPP1 PE=1 SV=2	1	203816	369364	159214	2870.42	473885	2870.42	2870.42	2870.42	522454	78791.3	334142	458196	533143	419837	184583	246603	226444	843979	435250	257997	310609	235194
IGLV2-23	P01705	Immunoglobulin lambda variable 2-23 OS=Homo sapiens OX=9606 GN=IGLV2-23 PE=1 SV=2	3	714883	606071	2870.42	985628	2870.42	218089	1.50439e+06	2870.42	2870.42	1.94757e+06	1.93942e+06	542253	229051	1.42501e+06	127082	541799	529334	199639	251092	294639	905784	1.55728e+06
GP1BB	P13224	Platelet glycoprotein Ib beta chain OS=Homo sapiens OX=9606 GN=GP1BB PE=1 SV=1	1	103069	133886	142256	2870.42	154482	193173	2870.42	212112	227106	2870.42	2870.42	90080.6	92142.2	82583.5	45290.2	199100	140850	128853	242838	169755	139106	98340.7
ILF3	Q12906	Interleukin enhancer-binding factor 3 OS=Homo sapiens OX=9606 GN=ILF3 PE=1 SV=3	3	189368	295495	2870.42	2870.42	2870.42	2870.42	2870.42	1.86784e+06	2870.42	2870.42	2870.42	2870.42	2.14001e+06	2870.42	105162	98476.4	2870.42	2870.42	2870.42	2870.42	290782	306171
IGHV1-69	P01742	Immunoglobulin heavy variable 1-69 OS=Homo sapiens OX=9606 GN=IGHV1-69 PE=1 SV=2	1	6677	36555.8	2870.42	2870.42	2870.42	2870.42	2870.42	2870.42	2870.42	2870.42	2870.42	40936.2	187552	2870.42	2870.42	2870.42	2870.42	28924.7	2870.42	68274.4	22442.9	44011.7
SOWAHA	Q2M3V2	Ankyrin repeat domain-containing protein SOWAHA OS=Homo sapiens OX=9606 GN=SOWAHA PE=1 SV=3	1	61919.2	9745.63	83339.1	2870.42	115008	2870.42	79017.5	2870.42	39186.1	2870.42	2870.42	288289	2870.42	2870.42	2870.42	2870.42	71622.5	2870.42	2870.42	2870.42	2870.42	2870.42
KRT6B	P04259	Keratin, type II cytoskeletal 6B OS=Homo sapiens OX=9606 GN=KRT6B PE=1 SV=5	1	267949	582936	2870.42	1.63586e+06	2870.42	2870.42	470385	275763	2870.42	190043	93091.9	2870.42	778388	108791	609198	842907	850139	16393	1.89302e+06	644709	2870.42	82942.2
SORL1	Q92673	Sortilin-related receptor OS=Homo sapiens OX=9606 GN=SORL1 PE=1 SV=2	2	58255.1	192671	114881	2870.42	136856	2870.42	85111.5	2870.42	130384	100967	2870.42	2870.42	167702	100597	244176	109742	214021	711650	2870.42	89928.4	232089	53935.5
PSMB8	P28062	Proteasome subunit beta type-8 OS=Homo sapiens OX=9606 GN=PSMB8 PE=1 SV=3	1	2870.42	45270	2870.42	2870.42	2870.42	2870.42	2870.42	2870.42	2870.42	2870.42	2870.42	2870.42	301881	97055.1	2870.42	33671	2870.42	2870.42	2870.42	2870.42	2870.42	2870.42
GOLIM4	O00461	Golgi integral membrane protein 4 OS=Homo sapiens OX=9606 GN=GOLIM4 PE=1 SV=1	3	389640	511938	1.00155e+06	832069	602655	311523	479282	2870.42	395141	2870.42	265567	2870.42	846913	558652	726764	575380	366481	258623	820965	213333	342772	409495
NRP1	O14786	Neuropilin-1 OS=Homo sapiens OX=9606 GN=NRP1 PE=1 SV=3	1	509616	447164	551212	423690	544244	383361	574319	130820	466630	859192	399852	762839	992748	356197	997560	770290	2870.42	2870.42	313186	2870.42	380090	652957
CLSTN1	O94985	Calsyntenin-1 OS=Homo sapiens OX=9606 GN=CLSTN1 PE=1 SV=1	2	247810	175817	110874	384263	125462	336618	256011	172363	331411	300162	257411	203528	286029	2870.42	378651	213261	223974	189721	2870.42	72828.7	2870.42	385097
PLD4	Q96BZ4	5'-3' exonuclease PLD4 OS=Homo sapiens OX=9606 GN=PLD4 PE=2 SV=2	1	654889	981357	418924	2870.42	615535	2870.42	711489	657751	986827	1.88083e+06	1.26892e+06	2870.42	283488	1.09966e+06	1.30488e+06	1.38578e+06	1.16518e+06	1.12738e+06	717482	452900	1.36344e+06	913370
ADAMTSL2	Q86TH1	ADAMTS-like protein 2 OS=Homo sapiens OX=9606 GN=ADAMTSL2 PE=1 SV=1	2	237092	450716	668336	2870.42	278962	59060.2	418703	334589	2870.42	510358	2870.42	92297.1	642089	255364	770510	292846	380594	399626	314180	98910.6	500946	852098
OLFML1	Q6UWY5	Olfactomedin-like protein 1 OS=Homo sapiens OX=9606 GN=OLFML1 PE=1 SV=2	1	247991	175549	260729	122243	220537	128460	263635	173406	321326	275391	355313	358873	2870.42	228290	2870.42	91201.9	238384	263956	215385	2870.42	293383	416283
SORD	Q00796	Sorbitol dehydrogenase OS=Homo sapiens OX=9606 GN=SORD PE=1 SV=4	1	225035	142654	247036	94094	2870.42	24015	270154	2870.42	2870.42	156268	1.30812e+06	142044	35808.8	183009	188053	119635	106914	212006	99251	223382	138513	119973
YWHAQ	P27348	14-3-3 protein theta OS=Homo sapiens OX=9606 GN=YWHAQ PE=1 SV=1	1	14096.3	102052	2870.42	2870.42	2870.42	2870.42	2870.42	30118.9	2870.42	2870.42	2870.42	87880.9	470672	56214.3	2870.42	2870.42	2870.42	116105	66660.2	146210	153174	2870.42
YWHAH	Q04917	14-3-3 protein eta OS=Homo sapiens OX=9606 GN=YWHAH PE=1 SV=4	1	55260.3	149823	116939	2870.42	131340	99668.1	2870.42	2870.42	187433	2870.42	2870.42	2870.42	476811	147594	2870.42	140985	111919	223291	134285	2870.42	177359	80240.9
LSP1	P33241	Lymphocyte-specific protein 1 OS=Homo sapiens OX=9606 GN=LSP1 PE=1 SV=1	3	35985	145506	73061.1	2870.42	128044	2870.42	128257	2870.42	13264.8	2870.42	2870.42	2870.42	876638	32630.5	69091.5	31596.3	47973.8	2870.42	102500	2870.42	52586	236304
IGFBP1	P08833	Insulin-like growth factor-binding protein 1 OS=Homo sapiens OX=9606 GN=IGFBP1 PE=1 SV=1	1	132161	453227	2870.42	2870.42	2870.42	395753	182339	2870.42	168461	2870.42	2870.42	557839	236142	2870.42	183718	1.39104e+06	80640	489988	746628	595527	802853	2870.42
HMCN2	Q8NDA2	Hemicentin-2 OS=Homo sapiens OX=9606 GN=HMCN2 PE=2 SV=3	3	122383	390684	2870.42	2870.42	191202	2870.42	2870.42	2870.42	500735	324631	2870.42	190039	2870.42	1.47565e+06	402497	263037	281881	449501	186599	2870.42	493591	348337
COL1A1	P02452	Collagen alpha-1(I) chain OS=Homo sapiens OX=9606 GN=COL1A1 PE=1 SV=5	1	73675.5	184104	87737.2	2870.42	2870.42	2870.42	2870.42	2870.42	261655	225512	144628	2870.42	142071	142789	422112	224241	123488	107930	2870.42	519542	153129	2870.42
EIF3J	O75822	Eukaryotic translation initiation factor 3 subunit J OS=Homo sapiens OX=9606 GN=EIF3J PE=1 SV=2	1	21760.7	35559.5	39459.3	2870.42	2870.42	2870.42	2870.42	2870.42	77722.5	46017.4	2870.42	37185.5	47939.9	12473.2	43114.8	55292	2870.42	23848.4	24261.3	2870.42	74430.5	68494.5
CCDC183	Q5T5S1	Coiled-coil domain-containing protein 183 OS=Homo sapiens OX=9606 GN=CCDC183 PE=2 SV=3	1	233108	460880	168451	2870.42	156838	2870.42	2870.42	1.64991e+06	2870.42	2870.42	338663	2870.42	492432	270401	28815.2	2870.42	265933	2870.42	792381	1.72981e+06	317979	705306
PABPC1	P11940	Polyadenylate-binding protein 1 OS=Homo sapiens OX=9606 GN=PABPC1 PE=1 SV=2	2	48517.3	140359	76063.4	2870.42	2870.42	2870.42	2870.42	2870.42	180550	208466	2870.42	2870.42	868941	94670.2	113955	2870.42	2870.42	124028	37789.9	2870.42	96382.8	59216.2
GAL	P22466	Galanin peptides OS=Homo sapiens OX=9606 GN=GAL PE=1 SV=3	1	58493.2	27171.1	56614	26650.7	2870.42	55362.7	117809	2870.42	107081	135572	77230.1	2870.42	2870.42	99048.3	2870.42	71708.6	2870.42	2870.42	2870.42	2870.42	80860.9	2870.42
PLA2G7	Q13093	Platelet-activating factor acetylhydrolase OS=Homo sapiens OX=9606 GN=PLA2G7 PE=1 SV=1	1	62977.2	50888.9	47193.9	98284.2	159451	49445.8	2870.42	2870.42	2870.42	96764	57211.6	112810	2870.42	162871	2870.42	173438	2870.42	152488	2870.42	2870.42	2870.42	2870.42
KRT16	P08779	Keratin, type I cytoskeletal 16 OS=Homo sapiens OX=9606 GN=KRT16 PE=1 SV=4	2	9086.16	65085.4	2870.42	65027.8	2870.42	2870.42	2870.42	2870.42	2870.42	2870.42	2870.42	2870.42	166688	2870.42	86069.4	2870.42	107253	2870.42	273621	2870.42	2870.42	2870.42
ASPN	Q9BXN1	Asporin OS=Homo sapiens OX=9606 GN=ASPN PE=1 SV=2	1	8587.46	64846.1	60040.8	2870.42	2870.42	2870.42	2870.42	2870.42	2870.42	2870.42	2870.42	2870.42	2870.42	71254.9	2870.42	2870.42	2870.42	211359	2870.42	194043	2870.42	154581
AK1	P00568	Adenylate kinase isoenzyme 1 OS=Homo sapiens OX=9606 GN=AK1 PE=1 SV=3	1	92132.1	281711	2870.42	243751	220770	194656	2870.42	2870.42	244921	2870.42	2870.42	2870.42	2870.42	2870.42	2870.42	2.79128e+06	2870.42	2870.42	2870.42	2870.42	2870.42	2870.42
IGHV4-28	A0A0C4DH34	Immunoglobulin heavy variable 4-28 OS=Homo sapiens OX=9606 GN=IGHV4-28 PE=3 SV=1	2	100876	382080	115973	2870.42	96334.3	2870.42	83435.5	306563	83152.1	2870.42	2870.42	311818	2870.42	706226	115620	711122	150220	291485	35855	94286	1.48025e+06	232867
CILP	O75339	Cartilage intermediate layer protein 1 OS=Homo sapiens OX=9606 GN=CILP PE=1 SV=4	3	143732	141348	132296	762959	2870.42	2870.42	233557	2870.42	52119.6	137983	106918	2870.42	73061.3	51359.3	263287	114515	350343	106858	31755.4	2870.42	257202	162224
IGHV1-3	A0A0C4DH29	Immunoglobulin heavy variable 1-3 OS=Homo sapiens OX=9606 GN=IGHV1-3 PE=3 SV=1	1	59782.8	36678.6	49282.4	161794	29416.3	2870.42	27354.9	94536.7	23114.6	77381.1	76510.7	55566.9	2870.42	78979	43410	44437.2	14339.5	2870.42	2870.42	2870.42	21434.3	152704
GPT	P24298	Alanine aminotransferase 1 OS=Homo sapiens OX=9606 GN=GPT PE=1 SV=3	1	113437	160019	125011	2870.42	2870.42	2870.42	2870.42	97178.7	239815	289322	254465	117099	139160	180929	125481	100954	160710	2870.42	146470	358115	168505	216999
FAM76A	Q8TAV0	Protein FAM76A OS=Homo sapiens OX=9606 GN=FAM76A PE=2 SV=1	1	71368.2	105702	86002.1	2870.42	133534	2870.42	164303	82562.1	71922.5	2870.42	163876	2870.42	201825	92673	13914.1	2870.42	106528	46507.5	199435	137764	101248	154254
DEFA4	P12838	Neutrophil defensin 4 OS=Homo sapiens OX=9606 GN=DEFA4 PE=1 SV=2	1	27996.6	41830.7	48039.9	19709.2	29034.2	127222	30682.5	2870.42	2870.42	2870.42	13796.6	2870.42	90056.2	58634.3	71846.4	24330.9	10188.3	45359.7	65164	2870.42	25104.3	24752.5
TUBB1	Q9H4B7	Tubulin beta-1 chain OS=Homo sapiens OX=9606 GN=TUBB1 PE=1 SV=1	1	31831.2	61254.1	35518.9	2870.42	49429	49723.6	2870.42	2870.42	97448.2	12990.2	2870.42	61720.3	111887	54281.5	18691.7	52850.6	54029.1	118217	116989	2870.42	42670.1	40054.2
IFIT2	P09913	Interferon-induced protein with tetratricopeptide repeats 2 OS=Homo sapiens OX=9606 GN=IFIT2 PE=1 SV=1	1	179585	277080	2870.42	2870.42	2870.42	237592	328608	200407	289749	302382	425630	2870.42	389542	2870.42	278095	448504	378316	296957	164959	106840	339071	365649
CHMP2A	O43633	Charged multivesicular body protein 2a OS=Homo sapiens OX=9606 GN=CHMP2A PE=1 SV=1	1	2870.42	27909.7	2870.42	2870.42	2870.42	2870.42	2870.42	2870.42	2870.42	2870.42	2870.42	2870.42	96169.5	2870.42	2870.42	2870.42	2870.42	2870.42	2870.42	2870.42	159964	2870.42
EEF2	P13639	Elongation factor 2 OS=Homo sapiens OX=9606 GN=EEF2 PE=1 SV=4	1	2870.42	63696.3	2870.42	2870.42	2870.42	2870.42	2870.42	2870.42	2870.42	2870.42	2870.42	2870.42	188217	2870.42	2870.42	2870.42	2870.42	2870.42	425783	2870.42	2870.42	2870.42
FUBP1	Q96AE4	Far upstream element-binding protein 1 OS=Homo sapiens OX=9606 GN=FUBP1 PE=1 SV=3	1	2870.42	12236.9	2870.42	2870.42	2870.42	2870.42	2870.42	2870.42	2870.42	2870.42	2870.42	2870.42	91978.1	2870.42	2870.42	2870.42	2870.42	7427.54	2870.42	2870.42	2870.42	2870.42
SCG3	Q8WXD2	Secretogranin-3 OS=Homo sapiens OX=9606 GN=SCG3 PE=1 SV=3	2	29858.1	2870.42	83148.6	192469	2870.42	2870.42	2870.42	2870.42	2870.42	2870.42	2870.42	2870.42	2870.42	2870.42	2870.42	2870.42	2870.42	2870.42	2870.42	2870.42	2870.42	2870.42
HBG2	P69892	Hemoglobin subunit gamma-2 OS=Homo sapiens OX=9606 GN=HBG2 PE=1 SV=2	1	26878.4	2870.42	2870.42	2870.42	2870.42	2870.42	128022	2870.42	2870.42	2870.42	2870.42	117799	2870.42	2870.42	2870.42	2870.42	2870.42	2870.42	2870.42	2870.42	2870.42	2870.42
RUVBL2	Q9Y230	RuvB-like 2 OS=Homo sapiens OX=9606 GN=RUVBL2 PE=1 SV=3	1	42474.8	2870.42	2870.42	2870.42	2870.42	2870.42	265406	2870.42	136379	2870.42	2870.42	2870.42	2870.42	2870.42	2870.42	2870.42	2870.42	2870.42	2870.42	2870.42	2870.42	2870.42
PODN	Q7Z5L7	Podocan OS=Homo sapiens OX=9606 GN=PODN PE=1 SV=2	1	31312.4	2870.42	2870.42	2870.42	2870.42	2870.42	99999	2870.42	2870.42	190162	2870.42	2870.42	2870.42	2870.42	2870.42	2870.42	2870.42	2870.42	2870.42	2870.42	2870.42	2870.42
PLIN3	O60664	Perilipin-3 OS=Homo sapiens OX=9606 GN=PLIN3 PE=1 SV=3	8	294197	783428	511113	175420	150839	184128	471570	2870.42	842862	293422	306870	2870.42	3.61808e+06	444115	465904	613391	283666	452441	676943	540877	387779	351087
FCN1	O00602	Ficolin-1 OS=Homo sapiens OX=9606 GN=FCN1 PE=1 SV=2	2	226594	170090	142852	290281	113684	382423	104254	262279	163900	467668	264445	74149.6	399523	107145	2870.42	172451	141494	336241	109742	2870.42	283924	144634
IGLV10-54	A0A075B6I4	Immunoglobulin lambda variable 10-54 OS=Homo sapiens OX=9606 GN=IGLV10-54 PE=3 SV=1	2	2.87291e+06	5.5228e+06	3.79626e+06	1.006e+07	293968	428583	2870.42	365669	213216	5.06061e+06	2870.42	8.50503e+06	1.0695e+07	175244	5.27695e+06	5.33785e+06	7.8598e+06	7.79279e+06	979825	6.37612e+06	7.20461e+06	3.52982e+06
LTBP4	Q8N2S1	Latent-transforming growth factor beta-binding protein 4 OS=Homo sapiens OX=9606 GN=LTBP4 PE=1 SV=2	2	132146	375469	150516	2870.42	225119	2870.42	251735	90856.6	214861	74045	189298	119287	343531	205052	63641.6	349233	175407	373128	81639.8	1.59019e+06	294914	277958
IHH	Q14623	Indian hedgehog protein OS=Homo sapiens OX=9606 GN=IHH PE=1 SV=4	2	755386	633440	946405	834274	941593	546687	1.02132e+06	701449	607994	909607	616135	428396	2870.42	1.04453e+06	486416	698291	1.32331e+06	366384	908758	2870.42	588672	912291
PSAP	P07602	Prosaposin OS=Homo sapiens OX=9606 GN=PSAP PE=1 SV=2	1	219991	170821	300924	268214	237633	182201	219229	128023	210687	217510	208755	226739	2870.42	147182	281613	146243	176899	221283	161598	2870.42	215991	351661
VEGFC	P49767	Vascular endothelial growth factor C OS=Homo sapiens OX=9606 GN=VEGFC PE=1 SV=1	2	589305	820891	1.58953e+06	2870.42	1.17489e+06	599992	872983	321730	2870.42	53418.8	690547	584223	584582	934107	721216	1.11976e+06	295318	1.3669e+06	759031	429983	810700	1.18731e+06
COL6A2	P12110	Collagen alpha-2(VI) chain OS=Homo sapiens OX=9606 GN=COL6A2 PE=1 SV=4	2	165574	255645	257050	2870.42	275745	89815	333343	2870.42	265794	94654.8	261994	71598.6	121970	225890	147909	359649	250013	434136	121685	192492	374965	327743
OVCH2	Q7RTZ1	Ovochymase-2 OS=Homo sapiens OX=9606 GN=OVCH2 PE=3 SV=2	1	2.49083e+06	2.43869e+06	737393	2.13581e+06	797595	4.42739e+06	1.36897e+06	395486	2.31695e+06	633552	2.32416e+06	9.771e+06	2870.42	1.29451e+06	2870.42	2.93637e+06	1.11772e+06	3.53244e+06	2.50294e+06	1.43861e+06	4.97729e+06	6.58131e+06
PXDN	Q92626	Peroxidasin homolog OS=Homo sapiens OX=9606 GN=PXDN PE=1 SV=2	1	188683	181745	2870.42	168716	414471	130567	162011	149151	200116	229128	2870.42	426933	248963	154017	157916	94541.5	241724	286224	125594	141212	249000	118264
IGLV7-46	A0A075B6I9	Immunoglobulin lambda variable 7-46 OS=Homo sapiens OX=9606 GN=IGLV7-46 PE=3 SV=4	1	80824.7	124227	2870.42	2870.42	2870.42	2870.42	490144	2870.42	295140	2870.42	2870.42	2870.42	2870.42	170649	399529	2870.42	2870.42	216937	2870.42	236737	2870.42	204062
BASP1	P80723	Brain acid soluble protein 1 OS=Homo sapiens OX=9606 GN=BASP1 PE=1 SV=2	2	16670.9	48641.9	49814.3	2870.42	2870.42	2870.42	2870.42	2870.42	2870.42	2870.42	93931.7	2870.42	209740	35465.5	130331	2870.42	62522.9	2870.42	2870.42	2870.42	2870.42	34006.8
PAK2	Q13177	Serine/threonine-protein kinase PAK 2 OS=Homo sapiens OX=9606 GN=PAK2 PE=1 SV=3	1	37322.3	56193.7	53510.2	141062	2870.42	2870.42	29329	2870.42	19816.9	2870.42	2870.42	115153	379653	159320	2870.42	2870.42	2870.42	2870.42	2870.42	2870.42	2870.42	2870.42
RAB1A	P62820	Ras-related protein Rab-1A OS=Homo sapiens OX=9606 GN=RAB1A PE=1 SV=3	1	64467.5	8071.39	164654	2870.42	128072	92492.5	2870.42	97114.2	2870.42	2870.42	2870.42	147991	2870.42	2870.42	31696.2	2870.42	2870.42	2870.42	26054.3	2870.42	2870.42	2870.42
GLIPR2	Q9H4G4	Golgi-associated plant pathogenesis-related protein 1 OS=Homo sapiens OX=9606 GN=GLIPR2 PE=1 SV=3	2	92145.3	345987	311030	2870.42	79993.5	2870.42	291654	129146	2870.42	2870.42	95277.9	2870.42	1.12326e+06	275226	226097	680721	2870.42	261585	228429	2870.42	241804	417004
IGHV2-26	A0A0B4J1V2	Immunoglobulin heavy variable 2-26 OS=Homo sapiens OX=9606 GN=IGHV2-26 PE=3 SV=1	3	201642	248153	197253	196296	778241	100791	183555	286367	2870.42	200399	67772.6	2870.42	2870.42	159163	267932	140710	2870.42	804513	2870.42	2870.42	1.09486e+06	2870.42
INHBB	P09529	Inhibin beta B chain OS=Homo sapiens OX=9606 GN=INHBB PE=1 SV=2	2	78667.4	132078	2870.42	2870.42	155120	123818	103654	2870.42	96812.8	2870.42	2870.42	292917	56502.1	100750	2870.42	226780	75807.9	302377	167690	2870.42	328226	56902.2
IGLV4-60	A0A075B6I1	Immunoglobulin lambda variable 4-60 OS=Homo sapiens OX=9606 GN=IGLV4-60 PE=3 SV=1	1	51250.2	96858.1	272725	18555.1	90155.1	2870.42	2870.42	2870.42	2870.42	12529.7	2870.42	104185	38102.4	2870.42	42544.1	24189.6	2870.42	511323	18602	160293	73222.5	94563.7
PKLR	P30613	Pyruvate kinase PKLR OS=Homo sapiens OX=9606 GN=PKLR PE=1 SV=2	1	141987	67521.7	111635	2870.42	337625	109768	2870.42	103118	422761	129380	52367.2	147475	2870.42	70491.1	112975	2870.42	101264	62214.1	2870.42	2870.42	313919	2870.42
PPIA	P62937	Peptidyl-prolyl cis-trans isomerase A OS=Homo sapiens OX=9606 GN=PPIA PE=1 SV=2	1	33584.4	45044.7	2870.42	11516.2	111719	58977.2	2870.42	2870.42	118890	20389.8	2870.42	2870.42	90393.9	44604.7	31248.1	56710.5	38228.5	70409.6	2870.42	53508.9	59602	2870.42
LOX	P28300	Protein-lysine 6-oxidase OS=Homo sapiens OX=9606 GN=LOX PE=1 SV=2	1	78755.1	52459.7	51505.7	109545	80873.3	85023.7	87288.5	2870.42	165745	135101	66728.2	2870.42	111861	2870.42	95190.3	93458.7	2870.42	2870.42	2870.42	48144	161591	2870.42
FUT8	Q9BYC5	Alpha-(1,6)-fucosyltransferase OS=Homo sapiens OX=9606 GN=FUT8 PE=1 SV=2	2	106735	181942	2870.42	2870.42	503702	2870.42	429034	114518	2870.42	2870.42	2870.42	2870.42	803284	215106	2870.42	89492.7	2870.42	166669	2870.42	235187	298202	2870.42
AHCY	P23526	Adenosylhomocysteinase OS=Homo sapiens OX=9606 GN=AHCY PE=1 SV=4	1	18424.4	39829.3	2870.42	2870.42	2870.42	2870.42	2870.42	35949.5	107323	2870.42	20878.5	2870.42	153441	38777.7	2870.42	38544	22191.6	37204.9	2870.42	2870.42	96651.3	2870.42
SBSN	Q6UWP8	Suprabasin OS=Homo sapiens OX=9606 GN=SBSN PE=1 SV=2	1	78769.2	380961	199377	2870.42	2870.42	2870.42	245946	2870.42	322276	2870.42	2870.42	2870.42	891663	2.2548e+06	97785.1	301182	2870.42	115706	2870.42	2870.42	136994	2870.42
H1-3	P16402	Histone H1.3 OS=Homo sapiens OX=9606 GN=H1-3 PE=1 SV=2	3	288697	188641	2870.42	1.03346e+06	331424	72620.7	2870.42	2870.42	35663.3	2870.42	160217	1.2421e+06	1.26005e+06	540923	2870.42	2870.42	2870.42	65345.2	2870.42	2870.42	2870.42	2870.42
ACAA1	P09110	3-ketoacyl-CoA thiolase, peroxisomal OS=Homo sapiens OX=9606 GN=ACAA1 PE=1 SV=2	1	38481.3	25300.8	27542.4	2870.42	11795.5	2870.42	2870.42	103109	113178	82131.3	35575.2	2870.42	2870.42	2870.42	2870.42	2870.42	2870.42	2870.42	23077.3	192569	17269.1	2870.42
TIMP2	P16035	Metalloproteinase inhibitor 2 OS=Homo sapiens OX=9606 GN=TIMP2 PE=1 SV=2	1	68944.1	58982.4	78088.2	66742.3	114019	2870.42	115074	2870.42	129869	97845.3	79192.3	2870.42	2870.42	100232	2870.42	202552	2870.42	95468.3	2870.42	2870.42	2870.42	174350
DNAJB11	Q9UBS4	DnaJ homolog subfamily B member 11 OS=Homo sapiens OX=9606 GN=DNAJB11 PE=1 SV=1	2	78144.9	196497	120227	2870.42	287451	2870.42	2870.42	15509	341039	2870.42	2870.42	2870.42	498337	2870.42	72967.2	261823	2870.42	735653	140988	125512	2870.42	121080
BIN2	Q9UBW5	Bridging integrator 2 OS=Homo sapiens OX=9606 GN=BIN2 PE=1 SV=3	1	44071.4	84398.5	2870.42	79972.9	2870.42	2870.42	2870.42	145197	2870.42	2870.42	110483	87839.4	306651	124078	2870.42	151252	49964.3	68399.6	70022.1	2870.42	65007	2870.42
TXNDC5	Q8NBS9	Thioredoxin domain-containing protein 5 OS=Homo sapiens OX=9606 GN=TXNDC5 PE=1 SV=2	1	46470.6	80067.3	88298	186351	104186	2870.42	2870.42	2870.42	68648.9	2870.42	2870.42	2870.42	2870.42	139994	2870.42	162902	86765.2	124708	75287.9	2870.42	145791	56613.1
BLVRA	P53004	Biliverdin reductase A OS=Homo sapiens OX=9606 GN=BLVRA PE=1 SV=2	1	44138.6	42749.4	2870.42	2870.42	127496	75019.6	2870.42	2870.42	194760	2870.42	2870.42	26887.9	97790.8	2870.42	50699	64783.9	12275.3	46902.5	2870.42	2870.42	129975	16456.4
AKR7L	Q8NHP1	Aflatoxin B1 aldehyde reductase member 4 OS=Homo sapiens OX=9606 GN=AKR7L PE=2 SV=7	1	33144.7	51193.9	57660	2870.42	2870.42	2870.42	21454.1	2870.42	124196	110915	2870.42	2870.42	2870.42	48978.4	92758.3	41453.8	77187.8	89059.5	2870.42	2870.42	97541.7	56348.9
ACTG2	P63267	Actin, gamma-enteric smooth muscle OS=Homo sapiens OX=9606 GN=ACTG2 PE=1 SV=1	1	16204.3	30796.3	2870.42	2870.42	2870.42	2870.42	136209	2870.42	2870.42	2870.42	2870.42	2870.42	2870.42	2870.42	64408.2	96929.3	2870.42	2870.42	2870.42	2870.42	126533	2870.42
MYH1	P12882	Myosin-1 OS=Homo sapiens OX=9606 GN=MYH1 PE=1 SV=3	1	17773.8	7057.26	22162.3	2870.42	2870.42	2870.42	2870.42	2870.42	61432.7	74050.1	2870.42	2870.42	2870.42	2870.42	44738.8	2870.42	2870.42	2870.42	2870.42	2870.42	2870.42	2870.42
DBH	P09172	Dopamine beta-hydroxylase OS=Homo sapiens OX=9606 GN=DBH PE=1 SV=3	1	28439.7	17736.2	101754	2870.42	2870.42	90012.3	2870.42	2870.42	2870.42	72537.3	2870.42	2870.42	2870.42	2870.42	151528	2870.42	2870.42	2870.42	2870.42	2870.42	2870.42	2870.42
RAN	P62826	GTP-binding nuclear protein Ran OS=Homo sapiens OX=9606 GN=RAN PE=1 SV=3	1	18557.9	24446	2870.42	2870.42	159745	2870.42	2870.42	2870.42	2870.42	2870.42	2870.42	2870.42	2870.42	2870.42	2870.42	2870.42	2870.42	2870.42	2870.42	59002.4	132745	32620.3
LOXL1	Q08397	Lysyl oxidase homolog 1 OS=Homo sapiens OX=9606 GN=LOXL1 PE=1 SV=2	1	54702.2	7257.9	2870.42	122557	2870.42	2870.42	110906	2870.42	2870.42	293466	2870.42	2870.42	2870.42	2870.42	2870.42	2870.42	2870.42	2870.42	2870.42	2870.42	46745.2	2870.42
BOLA2	Q9H3K6	BolA-like protein 2 OS=Homo sapiens OX=9606 GN=BOLA2 PE=1 SV=1	1	57607.7	27492.7	2870.42	2870.42	2870.42	157951	2870.42	2870.42	247757	2870.42	2870.42	150276	2870.42	2870.42	2870.42	2870.42	2870.42	2870.42	2870.42	2870.42	249093	2870.42
ATP6V1G1	O75348	V-type proton ATPase subunit G 1 OS=Homo sapiens OX=9606 GN=ATP6V1G1 PE=1 SV=3	1	42586.1	11039.6	2870.42	2870.42	85547.8	2870.42	2870.42	128922	191298	2870.42	2870.42	2870.42	2870.42	2870.42	2870.42	2870.42	2870.42	2870.42	2870.42	2870.42	84562.2	2870.42
S100A11	P31949	Protein S100-A11 OS=Homo sapiens OX=9606 GN=S100A11 PE=1 SV=2	1	38447.8	7817.39	2870.42	319238	20983.8	2870.42	2870.42	2870.42	24163.2	2870.42	2870.42	2870.42	52340.1	2870.42	2870.42	2870.42	2870.42	2870.42	2870.42	2870.42	2870.42	2870.42
SEMA4B	Q9NPR2	Semaphorin-4B OS=Homo sapiens OX=9606 GN=SEMA4B PE=1 SV=4	1	346019	40457.1	378136	2870.42	2870.42	2870.42	2870.42	2870.42	2.99728e+06	64682.1	2870.42	2870.42	2870.42	2870.42	2870.42	2870.42	378737	2870.42	2870.42	2870.42	2870.42	2870.42
HLA-A	P04439	HLA class I histocompatibility antigen, A alpha chain OS=Homo sapiens OX=9606 GN=HLA-A PE=1 SV=2	4	657599	1.44937e+06	2870.42	284834	1.5895e+06	50122.9	897809	50793.2	2870.42	3.5985e+06	2870.42	95820.8	2.96517e+06	383055	509600	198831	661415	4.12774e+06	1.47354e+06	2870.42	483224	3.68822e+06
IGHV3-49	A0A0A0MS15	Immunoglobulin heavy variable 3-49 OS=Homo sapiens OX=9606 GN=IGHV3-49 PE=3 SV=1	2	80984.9	154509	2870.42	13527.8	136747	2870.42	78458.3	2870.42	192241	156278	148820	75166.6	115727	23332.8	26444	186112	50488.2	111206	2870.42	271954	256264	500695
IGLV2-18	A0A075B6J9	Immunoglobulin lambda variable 2-18 OS=Homo sapiens OX=9606 GN=IGLV2-18 PE=3 SV=2	1	466915	225520	323503	266231	158035	112906	209100	2.84597e+06	210812	2870.42	411842	127887	2870.42	412029	290875	452956	198228	333145	2870.42	2870.42	210926	348429
ICAM1	P05362	Intercellular adhesion molecule 1 OS=Homo sapiens OX=9606 GN=ICAM1 PE=1 SV=2	1	37460.1	79219.1	39554.4	2870.42	50999.2	2870.42	43601.3	36713.3	37152.5	109353	2870.42	48616.3	251022	26859.8	95530.6	2870.42	41778.3	229783	30534.7	46164.8	32980.3	34666.8
CALML3	P27482	Calmodulin-like protein 3 OS=Homo sapiens OX=9606 GN=CALML3 PE=1 SV=2	1	247683	242242	94848.1	640147	504989	196082	2870.42	2870.42	444623	122416	2870.42	465109	412539	218442	133466	2870.42	197963	339253	290098	388446	378114	61223
H2AC20	Q16777	Histone H2A type 2-C OS=Homo sapiens OX=9606 GN=H2AC20 PE=1 SV=4	1	2870.42	66340.9	2870.42	2870.42	2870.42	2870.42	2870.42	2870.42	2870.42	2870.42	2870.42	2870.42	637575	2870.42	2870.42	2870.42	2870.42	2870.42	2870.42	2870.42	2870.42	2870.42
H1-5	P16401	Histone H1.5 OS=Homo sapiens OX=9606 GN=H1-5 PE=1 SV=3	2	2870.42	29466.9	2870.42	2870.42	2870.42	2870.42	2870.42	2870.42	2870.42	2870.42	2870.42	2870.42	268835	2870.42	2870.42	2870.42	2870.42	2870.42	2870.42	2870.42	2870.42	2870.42
HMGB2	P26583	High mobility group protein B2 OS=Homo sapiens OX=9606 GN=HMGB2 PE=1 SV=2	2	2870.42	45257.2	2870.42	2870.42	2870.42	2870.42	2870.42	2870.42	2870.42	2870.42	2870.42	2870.42	426738	2870.42	2870.42	2870.42	2870.42	2870.42	2870.42	2870.42	2870.42	2870.42
IGKV3D-7	A0A0C4DH55	Immunoglobulin kappa variable 3D-7 OS=Homo sapiens OX=9606 GN=IGKV3D-7 PE=3 SV=5	1	2870.42	31233.1	2870.42	2870.42	2870.42	2870.42	2870.42	2870.42	2870.42	2870.42	2870.42	2870.42	2870.42	2870.42	2870.42	2870.42	2870.42	2870.42	286497	2870.42	2870.42	2870.42
ERICH3	Q5RHP9	Glutamate-rich protein 3 OS=Homo sapiens OX=9606 GN=ERICH3 PE=2 SV=1	2	2870.42	14290.8	2870.42	2870.42	2870.42	2870.42	2870.42	2870.42	2870.42	2870.42	2870.42	2870.42	117074	2870.42	2870.42	2870.42	2870.42	2870.42	2870.42	2870.42	2870.42	2870.42
HSPA8	P11142	Heat shock cognate 71 kDa protein OS=Homo sapiens OX=9606 GN=HSPA8 PE=1 SV=1	1	2870.42	20044.1	2870.42	2870.42	2870.42	2870.42	2870.42	2870.42	2870.42	2870.42	2870.42	2870.42	174607	2870.42	2870.42	2870.42	2870.42	2870.42	2870.42	2870.42	2870.42	2870.42
JPH4	Q96JJ6	Junctophilin-4 OS=Homo sapiens OX=9606 GN=JPH4 PE=1 SV=2	1	2870.42	238276	2870.42	2870.42	2870.42	2870.42	2870.42	2870.42	2870.42	2870.42	2870.42	2870.42	2870.42	2870.42	2870.42	2870.42	2870.42	2870.42	2870.42	2.35692e+06	2870.42	2870.42
GKN1	Q9NS71	Gastrokine-1 OS=Homo sapiens OX=9606 GN=GKN1 PE=1 SV=3	1	2870.42	79515.5	2870.42	2870.42	2870.42	2870.42	2870.42	2870.42	2870.42	2870.42	2870.42	2870.42	2870.42	2870.42	2870.42	2870.42	2870.42	2870.42	769321	2870.42	2870.42	2870.42
SNED1	Q8TER0	Sushi, nidogen and EGF-like domain-containing protein 1 OS=Homo sapiens OX=9606 GN=SNED1 PE=2 SV=2	2	2870.42	17771.6	2870.42	2870.42	2870.42	2870.42	2870.42	2870.42	2870.42	2870.42	2870.42	2870.42	2870.42	2870.42	2870.42	2870.42	2870.42	151882	2870.42	2870.42	2870.42	2870.42
RHOA	P61586	Transforming protein RhoA OS=Homo sapiens OX=9606 GN=RHOA PE=1 SV=1	2	2870.42	14449	2870.42	2870.42	2870.42	2870.42	2870.42	2870.42	2870.42	2870.42	2870.42	2870.42	118656	2870.42	2870.42	2870.42	2870.42	2870.42	2870.42	2870.42	2870.42	2870.42
HDGF	P51858	Hepatoma-derived growth factor OS=Homo sapiens OX=9606 GN=HDGF PE=1 SV=1	1	2870.42	14922.1	2870.42	2870.42	2870.42	2870.42	2870.42	2870.42	2870.42	2870.42	2870.42	2870.42	123387	2870.42	2870.42	2870.42	2870.42	2870.42	2870.42	2870.42	2870.42	2870.42
GGTLC3	B5MD39	Putative glutathione hydrolase light chain 3 OS=Homo sapiens OX=9606 GN=GGTLC3 PE=5 SV=1	1	2870.42	20392.6	2870.42	2870.42	2870.42	2870.42	2870.42	2870.42	2870.42	2870.42	2870.42	2870.42	2870.42	2870.42	2870.42	2870.42	2870.42	2870.42	2870.42	178092	2870.42	2870.42
S100A8	P05109	Protein S100-A8 OS=Homo sapiens OX=9606 GN=S100A8 PE=1 SV=1	1	11900.8	2870.42	2870.42	93174.7	2870.42	2870.42	2870.42	2870.42	2870.42	2870.42	2870.42	2870.42	2870.42	2870.42	2870.42	2870.42	2870.42	2870.42	2870.42	2870.42	2870.42	2870.42
CPS1	P31327	Carbamoyl-phosphate synthase [ammonia], mitochondrial OS=Homo sapiens OX=9606 GN=CPS1 PE=1 SV=2	1	26115.7	2870.42	2870.42	2870.42	2870.42	2870.42	2870.42	2870.42	235323	2870.42	2870.42	2870.42	2870.42	2870.42	2870.42	2870.42	2870.42	2870.42	2870.42	2870.42	2870.42	2870.42
ARID5A	Q03989	AT-rich interactive domain-containing protein 5A OS=Homo sapiens OX=9606 GN=ARID5A PE=1 SV=2	1	2870.42	300410	2870.42	2870.42	2870.42	2870.42	2870.42	2870.42	2870.42	2870.42	2870.42	2870.42	2870.42	2870.42	2870.42	2.97826e+06	2870.42	2870.42	2870.42	2870.42	2870.42	2870.42
ATF1	P18846	Cyclic AMP-dependent transcription factor ATF-1 OS=Homo sapiens OX=9606 GN=ATF1 PE=1 SV=2	1	2870.42	258997	2870.42	2870.42	2870.42	2870.42	2870.42	2870.42	2870.42	2870.42	2870.42	2870.42	2870.42	2870.42	2870.42	2870.42	2870.42	2870.42	2870.42	2.56413e+06	2870.42	2870.42
ARL5B	Q96KC2	ADP-ribosylation factor-like protein 5B OS=Homo sapiens OX=9606 GN=ARL5B PE=1 SV=1	1	2870.42	103082	2870.42	2870.42	2870.42	2870.42	2870.42	2870.42	2870.42	2870.42	2870.42	2870.42	2870.42	2870.42	2870.42	2870.42	2870.42	2870.42	2870.42	2870.42	2870.42	1.00499e+06
TTN	Q8WZ42	Titin OS=Homo sapiens OX=9606 GN=TTN PE=1 SV=4	1	25566.8	2870.42	2870.42	2870.42	2870.42	2870.42	229835	2870.42	2870.42	2870.42	2870.42	2870.42	2870.42	2870.42	2870.42	2870.42	2870.42	2870.42	2870.42	2870.42	2870.42	2870.42
PLA2G2A	P14555	Phospholipase A2, membrane associated OS=Homo sapiens OX=9606 GN=PLA2G2A PE=1 SV=2	1	2870.42	13391.5	2870.42	2870.42	2870.42	2870.42	2870.42	2870.42	2870.42	2870.42	2870.42	2870.42	108082	2870.42	2870.42	2870.42	2870.42	2870.42	2870.42	2870.42	2870.42	2870.42
DIS3L	Q8TF46	DIS3-like exonuclease 1 OS=Homo sapiens OX=9606 GN=DIS3L PE=1 SV=2	1	2870.42	17345.4	2870.42	2870.42	2870.42	2870.42	2870.42	2870.42	2870.42	2870.42	2870.42	2870.42	2870.42	2870.42	2870.42	2870.42	2870.42	147620	2870.42	2870.42	2870.42	2870.42
CENPU	Q71F23	Centromere protein U OS=Homo sapiens OX=9606 GN=CENPU PE=1 SV=1	1	2870.42	23153.3	2870.42	2870.42	2870.42	2870.42	2870.42	2870.42	2870.42	2870.42	2870.42	2870.42	2870.42	205700	2870.42	2870.42	2870.42	2870.42	2870.42	2870.42	2870.42	2870.42
GDF15	Q99988	Growth/differentiation factor 15 OS=Homo sapiens OX=9606 GN=GDF15 PE=1 SV=3	1	2870.42	20680.7	2870.42	2870.42	2870.42	2870.42	2870.42	2870.42	2870.42	2870.42	2870.42	2870.42	2870.42	2870.42	180973	2870.42	2870.42	2870.42	2870.42	2870.42	2870.42	2870.42
FGG	P02679	Fibrinogen gamma chain OS=Homo sapiens OX=9606 GN=FGG PE=1 SV=3	23	1.09611e+07	486951	31957.3	1.03777e+08	212204	1.38578e+06	138159	503681	823648	2870.42	1.18498e+06	1.55107e+06	1.32519e+06	55879	937023	586869	250750	690344	715132	50306.6	94154.8	163862
IGHG4	P01861	Immunoglobulin heavy constant gamma 4 OS=Homo sapiens OX=9606 GN=IGHG4 PE=1 SV=1	4	1.6623e+06	3.83295e+06	508000	3.66811e+06	1.34508e+06	1.78888e+06	4.65881e+06	810970	484000	2.07696e+06	372709	909502	1.30694e+07	5.0081e+06	2.05886e+06	8.66061e+06	2.03132e+06	2.53031e+06	539265	2870.42	3.69302e+06	735800
PKM	P14618	Pyruvate kinase PKM OS=Homo sapiens OX=9606 GN=PKM PE=1 SV=4	5	462403	782911	468965	226909	307926	376323	683393	487924	484547	795148	447885	345015	4.45161e+06	594604	471474	392046	305514	330502	448345	2870.42	364715	467426
CAT	P04040	Catalase OS=Homo sapiens OX=9606 GN=CAT PE=1 SV=3	4	535819	416697	337531	179229	1.14757e+06	717264	241728	302897	1.05043e+06	546247	241258	594034	1.21917e+06	2870.42	284071	509174	190003	129764	118250	1.02117e+06	566938	125553
IGHV3-33	P01772	Immunoglobulin heavy variable 3-33 OS=Homo sapiens OX=9606 GN=IGHV3-33 PE=1 SV=2	2	244049	194876	137540	49466.5	446846	275229	298031	222639	261982	165947	161647	421158	2870.42	216044	269895	193109	76177.1	344488	81192.8	434217	74326.8	256440
APP	P05067	Amyloid-beta precursor protein OS=Homo sapiens OX=9606 GN=APP PE=1 SV=3	4	2.72188e+06	3.76702e+06	4.55225e+06	2870.42	5.30339e+06	2.51316e+06	2.20827e+06	2.45766e+06	4.54859e+06	529561	3.0653e+06	2.03774e+06	4.70539e+06	3.75737e+06	929821	3.05803e+06	3.33644e+06	7.81621e+06	2.72804e+06	3.82802e+06	3.91308e+06	3.59775e+06
IGFBP2	P18065	Insulin-like growth factor-binding protein 2 OS=Homo sapiens OX=9606 GN=IGFBP2 PE=1 SV=2	5	386535	992863	631142	368699	205957	599349	523837	2870.42	69447.5	436507	571829	455712	2.03957e+06	517196	1.63592e+06	1.68803e+06	366181	579106	1.51546e+06	417316	478396	691450
CALR	P27797	Calreticulin OS=Homo sapiens OX=9606 GN=CALR PE=1 SV=1	4	406309	615456	200385	276214	743321	455968	504387	116735	1.01336e+06	2870.42	643369	106483	1.01407e+06	641115	21493.7	887661	373595	917951	117579	1.67979e+06	178797	322509
ANTXR1	Q9H6X2	Anthrax toxin receptor 1 OS=Homo sapiens OX=9606 GN=ANTXR1 PE=1 SV=2	4	433071	374504	269628	493498	649397	451808	158624	147780	532857	660917	423936	542261	2870.42	349385	509857	1.05535e+06	97191.4	330269	477300	210086	447831	264897
DCD	P81605	Dermcidin OS=Homo sapiens OX=9606 GN=DCD PE=1 SV=2	3	934928	816228	594955	1.5551e+06	1.92456e+06	366998	455452	2870.42	1.01554e+06	778504	817194	1.83811e+06	1.18618e+06	432398	1.89756e+06	843822	612897	536260	447808	989029	667554	548775
CCN2	P29279	CCN family member 2 OS=Homo sapiens OX=9606 GN=CCN2 PE=1 SV=2	2	847346	1.05426e+06	1.42184e+06	2870.42	1.76907e+06	1.54047e+06	469986	481106	1.32953e+06	371788	625115	461693	1.04573e+06	961526	375111	1.12601e+06	1.05769e+06	2.64872e+06	1.02364e+06	406857	675709	1.22164e+06
CTSD	P07339	Cathepsin D OS=Homo sapiens OX=9606 GN=CTSD PE=1 SV=1	2	202290	229270	217530	52731.6	43452.6	63689.9	127082	71125	340564	898768	118646	89310.9	296873	151201	316129	72385.6	367240	755113	57369.4	2870.42	204893	68622.9
CLEC3B	P05452	Tetranectin OS=Homo sapiens OX=9606 GN=CLEC3B PE=1 SV=3	2	186496	134987	106576	331831	115626	197268	186012	34018.4	269872	307135	192674	123952	61728	216717	150408	175208	63007.7	229045	124058	2870.42	93236.9	233590
IGKV1D-16	P01601	Immunoglobulin kappa variable 1D-16 OS=Homo sapiens OX=9606 GN=IGKV1D-16 PE=3 SV=2	1	338357	247319	495610	226152	534115	132583	1.11521e+06	163254	152692	269958	67935.6	226060	279379	296085	583649	208397	186777	185102	2870.42	111246	116576	503109
HPSE	Q9Y251	Heparanase OS=Homo sapiens OX=9606 GN=HPSE PE=1 SV=2	3	3.69133e+06	6.09122e+06	2.96222e+06	2870.42	4.62562e+06	3.63872e+06	2.96777e+06	5.92246e+06	8.1484e+06	601676	2.39154e+06	5.65201e+06	9.21732e+06	5.4819e+06	3.10992e+06	3.54154e+06	4.23474e+06	8.28177e+06	7.44825e+06	4.16132e+06	1.14015e+07	4.03392e+06
PDIA4	P13667	Protein disulfide-isomerase A4 OS=Homo sapiens OX=9606 GN=PDIA4 PE=1 SV=2	2	480417	373957	253867	503557	503413	2870.42	305447	224517	320894	180746	168684	2.34017e+06	684924	347399	396533	359997	260961	476068	432687	302398	296233	182368
ENTPD5	O75356	Ectonucleoside triphosphate diphosphohydrolase 5 OS=Homo sapiens OX=9606 GN=ENTPD5 PE=1 SV=1	1	190312	131709	150849	198458	104642	259081	180516	182200	235662	230627	146643	214444	94985.9	78928	2870.42	145559	243853	142039	177201	124126	192512	115014
LAMB1	P07942	Laminin subunit beta-1 OS=Homo sapiens OX=9606 GN=LAMB1 PE=1 SV=2	3	416160	494401	450530	2870.42	569587	342591	586395	246387	744254	513669	277785	427532	362033	624920	434785	420164	361280	812948	316932	426891	493782	690280
CSPG4	Q6UVK1	Chondroitin sulfate proteoglycan 4 OS=Homo sapiens OX=9606 GN=CSPG4 PE=1 SV=2	2	437067	899742	133742	184722	120130	1.10208e+06	1.77706e+06	106310	240142	418032	119526	168925	137544	161651	1.49846e+06	1.64093e+06	873071	1.31104e+06	55131.4	2870.42	1.61654e+06	1.70018e+06
PCYOX1	Q9UHG3	Prenylcysteine oxidase 1 OS=Homo sapiens OX=9606 GN=PCYOX1 PE=1 SV=3	1	69821.5	69475.4	89760.2	2870.42	82509.5	65149.7	69268.2	38474.2	68708.1	138518	30378.1	112578	70216.5	73882	77360.8	89018.3	52474.6	77788.3	74241.7	48309.9	80722.2	50739.7
PDGFC	Q9NRA1	Platelet-derived growth factor C OS=Homo sapiens OX=9606 GN=PDGFC PE=1 SV=2	1	43437.8	64701.9	41377.1	14336.3	63067.2	65407.5	60087.5	45206.6	79851.7	9133.37	53040.3	2870.42	48666.2	65217.2	27244.1	50679.9	43884.2	120349	62987.5	120376	54474.4	53140.1
OGN	P20774	Mimecan OS=Homo sapiens OX=9606 GN=OGN PE=1 SV=1	2	1.23594e+06	1.01763e+06	744592	1.07865e+06	1.1231e+06	1.7944e+06	1.27713e+06	552166	1.37724e+06	823503	1.49329e+06	2.09535e+06	2870.42	1.02141e+06	996331	1.11624e+06	1.36666e+06	1.07783e+06	1.26918e+06	1.12914e+06	1.14302e+06	1.05358e+06
ISLR	O14498	Immunoglobulin superfamily containing leucine-rich repeat protein OS=Homo sapiens OX=9606 GN=ISLR PE=2 SV=1	1	279478	340046	213860	280993	207333	253849	262159	89834.7	378124	254857	270857	582910	311432	469598	482166	426453	341767	380354	283380	2870.42	290064	412374
NRP2	O60462	Neuropilin-2 OS=Homo sapiens OX=9606 GN=NRP2 PE=1 SV=3	1	300748	420915	470132	372683	397953	299920	387492	208186	385378	326154	156709	2870.42	418171	497547	371960	396697	437588	808381	325897	239203	471437	242270
MYOC	Q99972	Myocilin OS=Homo sapiens OX=9606 GN=MYOC PE=1 SV=2	1	120499	137414	168295	59890.4	169208	76181.9	92905.5	2870.42	249716	249615	61494.5	74812.6	216355	117400	167293	212468	39787.9	159512	156279	58866.3	164861	81321.7
ADAMTS2	O95450	A disintegrin and metalloproteinase with thrombospondin motifs 2 OS=Homo sapiens OX=9606 GN=ADAMTS2 PE=2 SV=2	1	470730	384854	329781	488710	388924	247813	327494	2870.42	737752	763341	428234	992384	241947	426281	548430	596252	151059	582872	444347	248899	284927	323523
CTSB	P07858	Cathepsin B OS=Homo sapiens OX=9606 GN=CTSB PE=1 SV=3	1	624326	855593	417223	672306	963426	2870.42	491929	864399	673890	747546	566300	843367	1.0009e+06	1.19423e+06	833772	855785	613467	1.53727e+06	487059	793558	768768	471117
HPX	P02790	Hemopexin OS=Homo sapiens OX=9606 GN=HPX PE=1 SV=2	1	101219	85662.4	86609	204765	74575.2	89060.7	86851.7	97853.4	63579.3	120884	101638	86370.6	114867	94521.5	90921.7	91365.3	98026.5	170044	88009.5	2870.42	58723.5	47275.5
CAPN1	P07384	Calpain-1 catalytic subunit OS=Homo sapiens OX=9606 GN=CAPN1 PE=1 SV=1	1	190239	267463	216405	2870.42	325489	163649	225640	108092	335389	145185	129967	249706	542668	263686	259062	420048	126432	175809	191026	274406	272092	149404
UVRAG	Q9P2Y5	UV radiation resistance-associated gene protein OS=Homo sapiens OX=9606 GN=UVRAG PE=1 SV=1	1	3.29924e+06	3.2762e+06	3.44504e+06	980429	2.89303e+06	7.4054e+06	2.30607e+06	1.20519e+06	5.7612e+06	1.6075e+06	2.50819e+06	4.88034e+06	4.28973e+06	1.0185e+06	2.26717e+06	2.76928e+06	2870.42	1.15e+06	3.19577e+06	5.4168e+06	7.11208e+06	5.53977e+06
NPNT	Q6UXI9	Nephronectin OS=Homo sapiens OX=9606 GN=NPNT PE=2 SV=3	1	163293	183671	299990	177019	2870.42	156537	177508	164517	161242	156133	218183	118934	94990.4	205563	252102	243547	292845	206493	53455.7	105992	263831	117888
RANBP1	P43487	Ran-specific GTPase-activating protein OS=Homo sapiens OX=9606 GN=RANBP1 PE=1 SV=1	2	44158.8	8572.74	2870.42	2870.42	157795	50950	16042	2870.42	199578	2870.42	2870.42	2870.42	2870.42	14116.9	2870.42	2870.42	2870.42	2870.42	2870.42	2870.42	48647.1	2870.42
KIF1A	Q12756	Kinesin-like protein KIF1A OS=Homo sapiens OX=9606 GN=KIF1A PE=1 SV=2	1	55102.9	30604.4	2870.42	2870.42	74241.6	2870.42	132012	213103	2870.42	2870.42	114450	2870.42	2870.42	2870.42	2870.42	2870.42	2870.42	2870.42	2870.42	2870.42	141769	141312
PCSK1N	Q9UHG2	ProSAAS OS=Homo sapiens OX=9606 GN=PCSK1N PE=1 SV=1	2	30740.2	46512.8	2870.42	2870.42	2870.42	2870.42	2870.42	2870.42	125450	2870.42	158989	2870.42	2870.42	133892	2870.42	2870.42	2870.42	2870.42	106085	99982	2870.42	107946
RELN	P78509	Reelin OS=Homo sapiens OX=9606 GN=RELN PE=1 SV=3	2	71258	1.38007e+06	2870.42	2870.42	2870.42	2870.42	434149	255467	2870.42	2870.42	2870.42	2870.42	2870.42	2870.42	2870.42	2870.42	600283	2870.42	2870.42	562087	1.23992e+07	221877
LAG3	P18627	Lymphocyte activation gene 3 protein OS=Homo sapiens OX=9606 GN=LAG3 PE=1 SV=5	2	12237.9	37856.5	2870.42	2870.42	22739.7	2870.42	76675.7	2870.42	2870.42	2870.42	2870.42	2870.42	66800.6	24428.1	2870.42	2870.42	2870.42	174329	2870.42	2870.42	95784.3	2870.42
PRDX4	Q13162	Peroxiredoxin-4 OS=Homo sapiens OX=9606 GN=PRDX4 PE=1 SV=1	1	24039.2	44350.5	2870.42	149792	2870.42	2870.42	2870.42	2870.42	67636.1	2870.42	2870.42	2870.42	119875	63585.4	45355.3	2870.42	2870.42	197467	2870.42	2870.42	2870.42	2870.42
ITGA5	P08648	Integrin alpha-5 OS=Homo sapiens OX=9606 GN=ITGA5 PE=1 SV=2	1	49123.1	107062	2870.42	2870.42	2870.42	2870.42	2870.42	2870.42	234703	233566	2870.42	2870.42	2870.42	2870.42	395938	2870.42	2870.42	2870.42	2870.42	109866	229126	318465
S100A7	P31151	Protein S100-A7 OS=Homo sapiens OX=9606 GN=S100A7 PE=1 SV=4	1	23999.2	12613.5	2870.42	198514	18514.6	2870.42	2870.42	2870.42	2870.42	2870.42	2870.42	2870.42	19695.8	2870.42	2870.42	26080.1	37337.3	25799.7	2870.42	2870.42	2870.42	2870.42
GRXCR2	A6NFK2	Glutaredoxin domain-containing cysteine-rich protein 2 OS=Homo sapiens OX=9606 GN=GRXCR2 PE=3 SV=1	1	76109.8	25062.5	2870.42	2870.42	2870.42	2870.42	2870.42	94860.1	643274	2870.42	2870.42	2870.42	2870.42	64227.1	67877.1	2870.42	2870.42	2870.42	2870.42	2870.42	28425.7	72872.6
APEH	P13798	Acylamino-acid-releasing enzyme OS=Homo sapiens OX=9606 GN=APEH PE=1 SV=4	3	357589	217446	91664.6	20040.8	1.54604e+06	113550	57107.8	35225.8	1.61752e+06	2870.42	2870.42	88993.2	63660.5	2870.42	2870.42	42248.2	2870.42	41797.5	2870.42	183810	1.47655e+06	354915
ALDOB	P05062	Fructose-bisphosphate aldolase B OS=Homo sapiens OX=9606 GN=ALDOB PE=1 SV=2	2	155215	119055	294019	111895	2870.42	70627.7	90085.1	136374	188807	502275	152330	2870.42	2870.42	221436	219101	2870.42	154698	2870.42	186706	239468	157657	2870.42
MIA3	Q5JRA6	Transport and Golgi organization protein 1 homolog OS=Homo sapiens OX=9606 GN=MIA3 PE=1 SV=1	1	68751.1	102520	110567	2870.42	2870.42	98576.7	102867	2870.42	88460.7	162594	112964	2870.42	222004	174926	151770	92777.3	2870.42	95441.9	91131.2	121856	69552	2870.42
PTMS	P20962	Parathymosin OS=Homo sapiens OX=9606 GN=PTMS PE=1 SV=2	1	96535.2	44670.9	99718.3	227532	64267	116930	2870.42	103113	171906	77062	2870.42	99082.7	2870.42	55682.9	112739	2870.42	53471.4	70052.1	33949.2	2870.42	109334	2870.42
IGKJ1	A0A0A0MT89	Immunoglobulin kappa joining 1 OS=Homo sapiens OX=9606 GN=IGKJ1 PE=4 SV=2	1	406318	374175	224460	616733	248698	914165	422671	2870.42	984206	347320	299186	2870.42	315581	343513	649703	485991	420561	1.51492e+06	2870.42	2870.42	2870.42	2870.42
BDNF	P23560	Brain-derived neurotrophic factor OS=Homo sapiens OX=9606 GN=BDNF PE=1 SV=1	2	42588.2	37927.7	201473	2870.42	72085.4	2870.42	2870.42	2870.42	132230	2870.42	2870.42	2870.42	2870.42	2870.42	2870.42	211633	28378.8	21698.9	2870.42	2870.42	66071.5	37143.1
RNASE1	P07998	Ribonuclease pancreatic OS=Homo sapiens OX=9606 GN=RNASE1 PE=1 SV=4	1	52195.4	64076.2	2870.42	2870.42	95411	2870.42	2870.42	2870.42	2870.42	2870.42	168744	237706	161447	106078	2870.42	142046	64989.2	2870.42	2870.42	2870.42	151849	2870.42
EEF1G	P26641	Elongation factor 1-gamma OS=Homo sapiens OX=9606 GN=EEF1G PE=1 SV=3	1	18477.7	34479	2870.42	2870.42	66301	2870.42	2870.42	2870.42	62735.6	2870.42	2870.42	35647.8	166148	32933	2870.42	44467.9	2870.42	27962.1	2870.42	2870.42	58926.9	2870.42
IGLC7	A0M8Q6	Immunoglobulin lambda constant 7 OS=Homo sapiens OX=9606 GN=IGLC7 PE=1 SV=3	2	41293.6	32179.9	2870.42	32592.5	2870.42	13154.9	93352.7	177491	2870.42	2870.42	81993	2870.42	2870.42	2870.42	54115.4	139703	2870.42	2870.42	2870.42	107887	2870.42	2870.42
ADH1B	P00325	All-trans-retinol dehydrogenase [NAD(+)] ADH1B OS=Homo sapiens OX=9606 GN=ADH1B PE=1 SV=2	2	150658	110516	2870.42	2870.42	2870.42	2870.42	77117.5	2870.42	986850	186002	115504	126759	2870.42	109644	2870.42	2870.42	2870.42	2870.42	2870.42	873499	101925	2870.42
ST6GAL1	P15907	Beta-galactoside alpha-2,6-sialyltransferase 1 OS=Homo sapiens OX=9606 GN=ST6GAL1 PE=1 SV=1	3	46174	50966.7	2870.42	110130	2870.42	162545	77237.8	2870.42	73490.5	2870.42	23985.4	2870.42	2870.42	2870.42	2870.42	2870.42	2870.42	218875	161435	2870.42	109264	2870.42
KRT14	P02533	Keratin, type I cytoskeletal 14 OS=Homo sapiens OX=9606 GN=KRT14 PE=1 SV=4	1	31466.4	45439.2	2870.42	2870.42	2870.42	20624.7	44922.4	2870.42	66607.7	18805	2870.42	149352	86625.4	2870.42	303111	2870.42	2870.42	2870.42	2870.42	2870.42	44562.7	2870.42
ST13	P50502	Hsc70-interacting protein OS=Homo sapiens OX=9606 GN=ST13 PE=1 SV=2	2	100150	56097.4	2870.42	2870.42	258689	206948	48098.9	2870.42	426222	2870.42	2870.42	47186.3	147785	2870.42	2870.42	2870.42	2870.42	2870.42	2870.42	67082.9	326014	2870.42
PPP2R1A	P30153	Serine/threonine-protein phosphatase 2A 65 kDa regulatory subunit A alpha isoform OS=Homo sapiens OX=9606 GN=PPP2R1A PE=1 SV=4	1	142222	35465.9	2870.42	2870.42	255136	60711.5	2870.42	790379	224555	2870.42	2870.42	77084.7	108388	2870.42	2870.42	2870.42	2870.42	30123.4	2870.42	2870.42	196055	2870.42
EXT1	Q16394	Exostosin-1 OS=Homo sapiens OX=9606 GN=EXT1 PE=1 SV=2	2	227234	216658	312300	162788	386213	278155	361902	2870.42	250386	511981	2870.42	2870.42	2870.42	2870.42	588352	704068	487952	2870.42	2870.42	99809.5	272042	2870.42
IGHV3-73	A0A0B4J1V6	Immunoglobulin heavy variable 3-73 OS=Homo sapiens OX=9606 GN=IGHV3-73 PE=3 SV=1	3	311842	712736	550089	2870.42	314991	2870.42	925995	2870.42	607861	2870.42	2870.42	705134	474381	2.45614e+06	1.34391e+06	270539	2870.42	472779	2870.42	2870.42	729899	1.37111e+06
IGLV4-69	A0A075B6H9	Immunoglobulin lambda variable 4-69 OS=Homo sapiens OX=9606 GN=IGLV4-69 PE=1 SV=1	3	254585	354237	2870.42	2870.42	757750	2870.42	645425	2870.42	185121	209055	2870.42	734149	2870.42	1.3544e+06	255679	569381	2870.42	333398	2870.42	462570	149695	408630
CARD9	Q9H257	Caspase recruitment domain-containing protein 9 OS=Homo sapiens OX=9606 GN=CARD9 PE=1 SV=2	1	127290	215722	2870.42	363582	119243	2870.42	153812	2870.42	103072	2870.42	2870.42	518842	2870.42	2870.42	390139	392594	482653	384690	348397	2870.42	92207.1	57925.9
IGLV1-40	P01703	Immunoglobulin lambda variable 1-40 OS=Homo sapiens OX=9606 GN=IGLV1-40 PE=1 SV=2	1	139004	141522	145475	2870.42	94339.8	2870.42	516237	2870.42	117349	241554	263603	2870.42	2870.42	100548	2870.42	2870.42	167477	887651	2870.42	2870.42	2870.42	242326
SVEP1	Q4LDE5	Sushi, von Willebrand factor type A, EGF and pentraxin domain-containing protein 1 OS=Homo sapiens OX=9606 GN=SVEP1 PE=1 SV=3	2	33213.6	76221.6	2870.42	2870.42	2870.42	2870.42	33966	2870.42	38986.3	198326	2870.42	43635.7	207380	2870.42	253698	61066.7	2870.42	150615	2870.42	2870.42	30107.3	47866.9
PSMA6	P60900	Proteasome subunit alpha type-6 OS=Homo sapiens OX=9606 GN=PSMA6 PE=1 SV=1	1	141106	81372.6	2870.42	376576	50981.6	236455	2870.42	2870.42	64271.7	78995.1	2870.42	592298	578490	98883.9	2870.42	2870.42	2870.42	2870.42	2870.42	2870.42	54490.2	64640
STOM	P27105	Stomatin OS=Homo sapiens OX=9606 GN=STOM PE=1 SV=3	1	74169.3	164922	2870.42	2870.42	263652	2870.42	61057.6	2870.42	369156	30605.6	2870.42	2870.42	2870.42	217116	125514	224455	2870.42	355914	2870.42	425016	289721	2870.42
BHMT	Q93088	Betaine--homocysteine S-methyltransferase 1 OS=Homo sapiens OX=9606 GN=BHMT PE=1 SV=2	1	94616.1	50602.9	2870.42	2870.42	26982	2870.42	53831.3	342642	149674	346195	2870.42	15356.3	2870.42	2870.42	164149	29877.6	2870.42	2870.42	2870.42	257895	36883.9	2870.42
LDHA	P00338	L-lactate dehydrogenase A chain OS=Homo sapiens OX=9606 GN=LDHA PE=1 SV=2	2	12801	97793.8	2870.42	102176	2870.42	2870.42	2870.42	2870.42	2870.42	2870.42	2870.42	2870.42	2870.42	2870.42	2870.42	2870.42	2870.42	2870.42	50995	903979	2870.42	2870.42
CDC37	Q16543	Hsp90 co-chaperone Cdc37 OS=Homo sapiens OX=9606 GN=CDC37 PE=1 SV=1	3	9924.8	62820.3	2870.42	2870.42	2870.42	2870.42	2870.42	2870.42	73414.2	2870.42	2870.42	2870.42	396355	2870.42	208884	2870.42	2870.42	2870.42	2870.42	2870.42	2870.42	2870.42
PSMD1	Q99460	26S proteasome non-ATPase regulatory subunit 1 OS=Homo sapiens OX=9606 GN=PSMD1 PE=1 SV=2	2	25471	45459.3	2870.42	2870.42	228876	2870.42	2870.42	2870.42	2870.42	2870.42	2870.42	2870.42	2870.42	2870.42	2870.42	2870.42	2870.42	2870.42	2870.42	2870.42	263084	168546
SPTA1	P02549	Spectrin alpha chain, erythrocytic 1 OS=Homo sapiens OX=9606 GN=SPTA1 PE=1 SV=5	2	32032.4	21654.1	2870.42	2870.42	108818	2870.42	2870.42	2870.42	188542	2870.42	2870.42	2870.42	2870.42	2870.42	2870.42	2870.42	2870.42	2870.42	2870.42	2870.42	190707	2870.42
LILRA1	O75019	Leukocyte immunoglobulin-like receptor subfamily A member 1 OS=Homo sapiens OX=9606 GN=LILRA1 PE=2 SV=1	1	27726	8309.57	172721	81575.1	2870.42	2870.42	2870.42	2870.42	2870.42	2870.42	2870.42	2870.42	2870.42	2870.42	2870.42	2870.42	2870.42	2870.42	2870.42	57261.9	2870.42	2870.42
MSLN	Q13421	Mesothelin OS=Homo sapiens OX=9606 GN=MSLN PE=1 SV=2	1	4079.48	27513.5	2870.42	2870.42	2870.42	2870.42	14961	2870.42	2870.42	2870.42	2870.42	2870.42	2870.42	2870.42	2870.42	39204	2870.42	212968	2870.42	2870.42	2870.42	2870.42
CILP2	Q8IUL8	Cartilage intermediate layer protein 2 OS=Homo sapiens OX=9606 GN=CILP2 PE=2 SV=2	1	15258.2	21617.2	2870.42	2870.42	2870.42	2870.42	2870.42	2870.42	126748	2870.42	2870.42	2870.42	2870.42	2870.42	2870.42	116650	2870.42	2870.42	2870.42	2870.42	76559	2870.42
UBXN1	Q04323	UBX domain-containing protein 1 OS=Homo sapiens OX=9606 GN=UBXN1 PE=1 SV=2	1	33337.8	6158.7	2870.42	201832	2870.42	2870.42	2870.42	2870.42	108582	2870.42	2870.42	2870.42	2870.42	2870.42	2870.42	2870.42	2870.42	2870.42	2870.42	2870.42	35753.2	2870.42
C1QTNF9B	B2RNN3	Complement C1q and tumor necrosis factor-related protein 9B OS=Homo sapiens OX=9606 GN=C1QTNF9B PE=1 SV=1	1	7906.44	16416.1	2870.42	2870.42	53230.6	2870.42	2870.42	2870.42	2870.42	2870.42	2870.42	2870.42	2870.42	2870.42	2870.42	109673	2870.42	2870.42	31523.9	2870.42	2870.42	2870.42
S100PBP	Q96BU1	S100P-binding protein OS=Homo sapiens OX=9606 GN=S100PBP PE=1 SV=1	1	12944.9	19758.3	2870.42	2870.42	2870.42	103615	2870.42	2870.42	2870.42	2870.42	2870.42	2870.42	2870.42	2870.42	122998	2870.42	2870.42	2870.42	2870.42	51621.5	2870.42	2870.42
CFHR3	Q02985	Complement factor H-related protein 3 OS=Homo sapiens OX=9606 GN=CFHR3 PE=1 SV=2	2	650814	598399	344236	331209	294674	820333	979199	2870.42	437905	279715	2.14562e+06	872373	2.24016e+06	208079	2870.42	2870.42	677898	169089	207698	1.92523e+06	286179	263907
APOBR	Q0VD83	Apolipoprotein B receptor OS=Homo sapiens OX=9606 GN=APOBR PE=1 SV=3	6	1.84479e+06	2.62158e+06	90837.2	2870.42	91279	244247	191827	2870.42	346351	465233	1.66641e+07	348320	4.66587e+06	108683	317688	2870.42	154242	349030	622129	63420.5	1.98386e+07	93349.9
LAMC1	P11047	Laminin subunit gamma-1 OS=Homo sapiens OX=9606 GN=LAMC1 PE=1 SV=3	4	450417	441149	40313	587787	296781	516278	567751	2870.42	1.20688e+06	696765	585873	2870.42	1.70322e+06	812273	51740.1	214600	85986.2	450224	2870.42	520610	120474	449495
HSP90AA1	P07900	Heat shock protein HSP 90-alpha OS=Homo sapiens OX=9606 GN=HSP90AA1 PE=1 SV=5	3	187036	311339	285599	103697	91188.6	151496	106031	2870.42	368676	485678	145530	129600	1.73394e+06	331974	266735	53846.6	187864	183446	184224	2870.42	165618	2870.42
LRG1	P02750	Leucine-rich alpha-2-glycoprotein OS=Homo sapiens OX=9606 GN=LRG1 PE=1 SV=2	3	267532	365244	51971	1.74901e+06	106797	54432.2	61333.8	184676	38833.9	2870.42	422527	2870.42	1.8956e+06	51369.5	2870.42	123917	37771.6	801505	48047.3	207321	34882.4	449159
IGKV1-16	P04430	Immunoglobulin kappa variable 1-16 OS=Homo sapiens OX=9606 GN=IGKV1-16 PE=1 SV=2	1	917343	204554	286438	2870.42	129405	44691.9	8.19155e+06	256004	128577	59775.7	2870.42	71248.9	350833	178624	333819	138648	163728	140046	89114.2	2870.42	132797	515058
ANGPT1	Q15389	Angiopoietin-1 OS=Homo sapiens OX=9606 GN=ANGPT1 PE=1 SV=2	2	181411	160316	563522	2870.42	59253.6	243043	23626.7	19720.3	727124	2870.42	27785.3	144299	419706	27869.5	2870.42	38676	224936	711768	62673	45820.1	45629.9	23213.7
IGHV6-1	A0A0B4J1U7	Immunoglobulin heavy variable 6-1 OS=Homo sapiens OX=9606 GN=IGHV6-1 PE=3 SV=1	2	457526	534291	226723	346821	592059	449452	971588	2870.42	284160	981774	236734	483078	2870.42	685700	661816	1.06651e+06	416345	636312	2870.42	94194.3	164779	1.61152e+06
ADGRE2	Q9UHX3	Adhesion G protein-coupled receptor E2 OS=Homo sapiens OX=9606 GN=ADGRE2 PE=1 SV=2	1	127293	84906.4	48091	119756	123308	162857	80094.8	25284	224602	377147	108918	2870.42	2870.42	77490.3	53000.5	121198	63245.9	212669	2870.42	74937.3	136186	104596
PDIA6	Q15084	Protein disulfide-isomerase A6 OS=Homo sapiens OX=9606 GN=PDIA6 PE=1 SV=1	1	109058	133378	103879	96799.4	123112	159673	113588	2870.42	217174	49517.7	2870.42	221095	206110	120695	109282	132544	126244	161261	240739	2870.42	130818	103217
EPDR1	Q9UM22	Mammalian ependymin-related protein 1 OS=Homo sapiens OX=9606 GN=EPDR1 PE=1 SV=2	1	192536	208440	255250	2870.42	265931	52876.7	154161	186862	543422	2870.42	238657	222456	159677	97498.5	2870.42	289633	237619	277142	390130	200720	255541	173568
TAF1A	Q15573	TATA box-binding protein-associated factor RNA polymerase I subunit A OS=Homo sapiens OX=9606 GN=TAF1A PE=1 SV=1	1	798577	858584	189120	2870.42	616116	734803	720108	2870.42	1.85061e+06	2365942	552762	950567	1.84674e+06	1.47737e+06	387565	879145	2870.42	1.11936e+06	833557	321258	1.21903e+06	498941
CCDC88C	Q9P219	Protein Daple OS=Homo sapiens OX=9606 GN=CCDC88C PE=1 SV=3	1	154272	145678	2870.42	323385	166258	196112	121007	99627.6	155451	117986	189718	170305	2870.42	114263	159425	303439	420179	248062	2870.42	45571.7	87569.4	72527.4
YWHAB	P31946	14-3-3 protein beta/alpha OS=Homo sapiens OX=9606 GN=YWHAB PE=1 SV=3	1	57284.3	96056	2870.42	2870.42	90522	2870.42	2870.42	2870.42	425546	2870.42	36681.6	2870.42	740420	2870.42	2870.42	2870.42	2870.42	2870.42	2870.42	2870.42	197177	2870.42
ACLY	P53396	ATP-citrate synthase OS=Homo sapiens OX=9606 GN=ACLY PE=1 SV=3	1	28431.7	16406.6	2870.42	2870.42	81687.4	31245.4	2870.42	2870.42	151292	2870.42	2870.42	2870.42	68838.2	2870.42	2870.42	2870.42	2870.42	2870.42	2870.42	2870.42	72264.4	2870.42
EMILIN1	Q9Y6C2	EMILIN-1 OS=Homo sapiens OX=9606 GN=EMILIN1 PE=1 SV=3	1	38021.2	59438	153643	2870.42	2870.42	124136	2870.42	82339.7	2870.42	2870.42	2870.42	2870.42	2870.42	2870.42	260608	2870.42	2870.42	2870.42	2870.42	2870.42	310809	2870.42
USP5	P45974	Ubiquitin carboxyl-terminal hydrolase 5 OS=Homo sapiens OX=9606 GN=USP5 PE=1 SV=2	2	67032.3	30988.8	2870.42	281635	83456.6	2870.42	2870.42	2870.42	285138	2870.42	2870.42	2870.42	2870.42	2870.42	26921.9	2870.42	2870.42	2870.42	2870.42	2870.42	260003	2870.42
PRDX6	P30041	Peroxiredoxin-6 OS=Homo sapiens OX=9606 GN=PRDX6 PE=1 SV=3	1	18455.1	9490.92	2870.42	2870.42	30001	2870.42	2870.42	2870.42	120105	14351.3	2870.42	2870.42	36298.2	2870.42	2870.42	2870.42	2870.42	2870.42	2870.42	2870.42	35647.6	2870.42
EZR	P15311	Ezrin OS=Homo sapiens OX=9606 GN=EZR PE=1 SV=4	2	15929.5	44233.5	2870.42	2870.42	2870.42	2870.42	2870.42	83971.3	52360.2	2870.42	2870.42	2870.42	300131	2870.42	95373	2870.42	2870.42	26737.6	2870.42	2870.42	2870.42	2870.42
IGKV6-21	A0A0C4DH24	Immunoglobulin kappa variable 6-21 OS=Homo sapiens OX=9606 GN=IGKV6-21 PE=3 SV=1	1	19304	46746	53901.1	2870.42	116175	2870.42	2870.42	2870.42	2870.42	2870.42	2870.42	2870.42	2870.42	104299	2870.42	290274	2870.42	52793.8	2870.42	2870.42	2870.42	2870.42
CCT6A	P40227	T-complex protein 1 subunit zeta OS=Homo sapiens OX=9606 GN=CCT6A PE=1 SV=3	2	120293	72618	2870.42	740714	2870.42	2870.42	2870.42	2870.42	439256	2870.42	2870.42	2870.42	62365.9	2870.42	2870.42	2870.42	2870.42	2870.42	2870.42	257744	385978	2870.42
SFTPA1	Q8IWL2	Pulmonary surfactant-associated protein A1 OS=Homo sapiens OX=9606 GN=SFTPA1 PE=1 SV=2	1	10995	14748.2	2870.42	28669.2	2870.42	2870.42	2870.42	58316.9	2870.42	2870.42	2870.42	2870.42	2870.42	2870.42	2870.42	2870.42	15268.9	96484.5	2870.42	2870.42	2870.42	15635.3
IGHV3-72	A0A0B4J1Y9	Immunoglobulin heavy variable 3-72 OS=Homo sapiens OX=9606 GN=IGHV3-72 PE=3 SV=1	4	490098	775314	262714	150407	937536	16814.6	1.96575e+06	554816	387690	2870.42	2870.42	619512	2870.42	1.01168e+06	1.24068e+06	2870.42	2870.42	1.251e+06	188010	83382.9	358060	3.61171e+06
TPM1	P09493	Tropomyosin alpha-1 chain OS=Homo sapiens OX=9606 GN=TPM1 PE=1 SV=2	1	140105	144266	46349.5	2870.42	2870.42	288225	85878.7	56652.4	661325	2870.42	123540	130467	106271	134525	106091	2870.42	88484.9	400474	173730	156274	271072	2870.42
FSTL1	Q12841	Follistatin-related protein 1 OS=Homo sapiens OX=9606 GN=FSTL1 PE=1 SV=1	2	199406	264292	257204	2870.42	357136	99044.2	302080	2870.42	298530	325163	2870.42	346288	2870.42	223185	377751	413349	283357	604974	306515	157480	2870.42	270565
PRG3	Q9Y2Y8	Proteoglycan 3 OS=Homo sapiens OX=9606 GN=PRG3 PE=1 SV=2	1	25882.7	41411.2	18227.3	2870.42	45070.6	18909.7	2870.42	2870.42	60223.7	47288.1	41689.6	18806.7	2870.42	45784.9	54557.1	40723.4	40081.8	67472.1	37266.8	2870.42	96368.2	26117
DDI2	Q5TDH0	Protein DDI1 homolog 2 OS=Homo sapiens OX=9606 GN=DDI2 PE=1 SV=1	2	280521	167333	177207	2870.42	971628	403824	68691.6	39749.2	1.00686e+06	96732.6	34780.8	2870.42	2870.42	28794.3	62337.9	42977.8	105688	69907.4	2870.42	301668	1.05334e+06	2870.42
COL1A2	P08123	Collagen alpha-2(I) chain OS=Homo sapiens OX=9606 GN=COL1A2 PE=1 SV=7	1	35716.1	53356.9	25039.6	2870.42	30637	30851.1	59253.9	2870.42	127149	30384.7	30330	17774.9	119226	62623.7	2870.42	57505.8	40856.3	89640.6	2870.42	2870.42	96950.4	58155.1
ADAM10	O14672	Disintegrin and metalloproteinase domain-containing protein 10 OS=Homo sapiens OX=9606 GN=ADAM10 PE=1 SV=1	1	60854.6	71125.5	91892.8	76243	74934.9	91132.5	64295.8	56538.3	2870.42	85068.2	62699.3	2870.42	65492.2	143296	134464	82270.4	77869.9	2870.42	2870.42	90308.6	108942	2870.42
IGHV3-35	A0A0C4DH35	Probable non-functional immunoglobulin heavy variable 3-35 OS=Homo sapiens OX=9606 GN=IGHV3-35 PE=1 SV=1	1	15034.4	43615.6	2870.42	13265.2	2870.42	2870.42	2870.42	2870.42	2870.42	20914.3	96071.3	2870.42	6616.96	2870.42	104373	2870.42	2870.42	2870.42	142521	2870.42	2870.42	165422
S100A9	P06702	Protein S100-A9 OS=Homo sapiens OX=9606 GN=S100A9 PE=1 SV=1	3	642921	183592	19299.5	6.33897e+06	2870.42	39307.2	14411.3	2870.42	2870.42	2870.42	2870.42	2870.42	1.23923e+06	2870.42	2870.42	199246	2870.42	377345	2870.42	2870.42	2870.42	2870.42
PSMB7	Q99436	Proteasome subunit beta type-7 OS=Homo sapiens OX=9606 GN=PSMB7 PE=1 SV=1	1	111370	152827	325178	2870.42	268019	2870.42	234968	2870.42	268311	2870.42	2870.42	2870.42	873469	2870.42	2870.42	2870.42	2870.42	2870.42	2870.42	362818	271891	2870.42
NUTF2	P61970	Nuclear transport factor 2 OS=Homo sapiens OX=9606 GN=NUTF2 PE=1 SV=1	1	55595.4	48099.2	93462.6	2870.42	255284	2870.42	75179	2870.42	2870.42	2870.42	2870.42	114806	2870.42	2870.42	2870.42	2870.42	109449	2870.42	2870.42	93824.1	257627	2870.42
AEBP1	Q8IUX7	Adipocyte enhancer-binding protein 1 OS=Homo sapiens OX=9606 GN=AEBP1 PE=1 SV=1	1	58200.9	26800.1	132164	2870.42	2870.42	2870.42	2870.42	2870.42	125197	236012	2870.42	71413	83841.5	2870.42	2870.42	99153.5	2870.42	2870.42	64912.8	2870.42	2870.42	2870.42
PPM1B	O75688	Protein phosphatase 1B OS=Homo sapiens OX=9606 GN=PPM1B PE=1 SV=1	3	105321	204971	333002	41447.6	166336	2870.42	85725.5	2870.42	233310	2870.42	181906	2870.42	848026	526874	236541	2870.42	116187	22723.9	2870.42	133366	157385	2870.42
PIP4K2A	P48426	Phosphatidylinositol 5-phosphate 4-kinase type-2 alpha OS=Homo sapiens OX=9606 GN=PIP4K2A PE=1 SV=2	2	137782	57689.5	121096	321012	293061	110331	2870.42	2870.42	451160	2870.42	2870.42	69676.4	45088.6	27152.3	2870.42	44502.9	2870.42	54940.8	57557.7	164309	174732	2870.42
WARS1	P23381	Tryptophan--tRNA ligase, cytoplasmic OS=Homo sapiens OX=9606 GN=WARS1 PE=1 SV=2	1	56704.4	116861	58072.7	2870.42	60738.6	2870.42	51652.2	2870.42	76411.3	166091	142596	2870.42	366002	224819	50102.8	79202.3	222884	160394	2870.42	2870.42	56591	2870.42
INSL3	P51460	Insulin-like 3 OS=Homo sapiens OX=9606 GN=INSL3 PE=1 SV=2	1	18116.9	17939.3	2870.42	2870.42	2870.42	40744.5	16106.7	26326.2	40039.9	40517.1	5953.26	2870.42	32471.6	32633.3	14342.3	12263.8	2870.42	39336.8	14571	25162.8	2870.42	2870.42
IGLV9-49	A0A0B4J1Y8	Immunoglobulin lambda variable 9-49 OS=Homo sapiens OX=9606 GN=IGLV9-49 PE=1 SV=1	3	840070	598033	2870.42	2870.42	1.86215e+06	2870.42	219757	1.05813e+06	1.49256e+06	35294.2	578407	3.14579e+06	2870.42	2.07032e+06	77045.2	2870.42	183430	1.00846e+06	2870.42	1.95714e+06	2870.42	672457
PSMA5	P28066	Proteasome subunit alpha type-5 OS=Homo sapiens OX=9606 GN=PSMA5 PE=1 SV=3	1	236879	237367	158958	319742	475223	2870.42	223596	2870.42	489820	451593	241247	2870.42	992332	468996	134190	2870.42	234929	147436	2870.42	2870.42	384301	2870.42
IGHD	P01880	Immunoglobulin heavy constant delta OS=Homo sapiens OX=9606 GN=IGHD PE=1 SV=3	1	169657	203732	2870.42	159491	431397	199886	2870.42	35969.5	2870.42	167814	252683	440718	120758	67935.2	361462	117375	2870.42	1.26974e+06	2870.42	2870.42	2870.42	88568.6
MXRA7	P84157	Matrix-remodeling-associated protein 7 OS=Homo sapiens OX=9606 GN=MXRA7 PE=1 SV=1	1	191948	166903	348430	2870.42	211860	2870.42	290170	2870.42	268805	218896	204852	367858	2870.42	193766	242378	452514	2870.42	213122	2870.42	287231	268537	2870.42
STC2	O76061	Stanniocalcin-2 OS=Homo sapiens OX=9606 GN=STC2 PE=1 SV=1	1	137557	128833	240400	2870.42	174986	105092	282423	2870.42	167635	235063	2870.42	161364	2870.42	174759	292493	297886	2870.42	118727	2870.42	2870.42	141848	251139
LAMB2	P55268	Laminin subunit beta-2 OS=Homo sapiens OX=9606 GN=LAMB2 PE=1 SV=2	3	509733	48130.1	2870.42	2870.42	2870.42	35598.3	2870.42	2870.42	139264	78799.3	66667.8	4.76265e+06	206140	2870.42	73913.3	2870.42	2870.42	2870.42	142261	2870.42	2870.42	41764.8
IGLV6-57	P01721	Immunoglobulin lambda variable 6-57 OS=Homo sapiens OX=9606 GN=IGLV6-57 PE=1 SV=2	1	17117.7	84729	21144.2	2870.42	54991	2870.42	34093.5	2870.42	2870.42	43725.7	2870.42	2870.42	2870.42	2870.42	37746.2	201890	2870.42	470966	2870.42	2870.42	37114.8	85220.9
CGREF1	Q99674	Cell growth regulator with EF hand domain protein 1 OS=Homo sapiens OX=9606 GN=CGREF1 PE=2 SV=3	1	35883.3	51054.9	2870.42	2870.42	2870.42	41299.6	75515.2	2870.42	158217	2870.42	2870.42	66578.6	49733.8	86395.2	138850	2870.42	123718	2870.42	2870.42	2870.42	97500.3	2870.42
SERPINE1	P05121	Plasminogen activator inhibitor 1 OS=Homo sapiens OX=9606 GN=SERPINE1 PE=1 SV=1	1	47752.7	58819.2	2870.42	2870.42	68992.9	2870.42	127293	108703	155315	2870.42	2870.42	2870.42	148492	121300	68164.2	2870.42	2870.42	2870.42	150696	2870.42	2870.42	85186.9
PDGFB	P01127	Platelet-derived growth factor subunit B OS=Homo sapiens OX=9606 GN=PDGFB PE=1 SV=1	1	24906.5	23838.3	36220.3	2870.42	51045.5	63541	2870.42	2870.42	81035.3	2870.42	2870.42	2870.42	2870.42	44348.9	41449.7	2870.42	39460.5	70256.5	2870.42	2870.42	28515.2	2870.42
IGHV2-5	P01817	Immunoglobulin heavy variable 2-5 OS=Homo sapiens OX=9606 GN=IGHV2-5 PE=1 SV=2	1	67761.9	55296.7	2870.42	340394	2870.42	35724.5	2870.42	2870.42	2870.42	2870.42	119266	165012	2870.42	2870.42	100076	2870.42	150031	93849.3	81474.8	2870.42	2870.42	113184
KRT6A	P02538	Keratin, type II cytoskeletal 6A OS=Homo sapiens OX=9606 GN=KRT6A PE=1 SV=3	2	638571	424778	2870.42	4.35765e+06	357025	2870.42	727875	396495	2870.42	2870.42	532308	2870.42	1.23112e+06	247771	2870.42	529191	2870.42	2870.42	1.13958e+06	686715	2870.42	401917
SHBG	P04278	Sex hormone-binding globulin OS=Homo sapiens OX=9606 GN=SHBG PE=1 SV=2	4	151346	210367	526459	200162	2870.42	332607	28554.7	2870.42	2870.42	2870.42	130489	283709	96364.3	194850	649632	263375	2870.42	2870.42	2870.42	885100	2870.42	2870.42
IGKV6D-21	A0A0A0MT36	Immunoglobulin kappa variable 6D-21 OS=Homo sapiens OX=9606 GN=IGKV6D-21 PE=3 SV=1	1	73961.8	183494	133162	98594.2	172000	2870.42	224396	2870.42	97113.9	2870.42	2870.42	2870.42	2870.42	651067	275001	237726	2870.42	197106	2870.42	2870.42	42431.6	420128
SFTPD	P35247	Pulmonary surfactant-associated protein D OS=Homo sapiens OX=9606 GN=SFTPD PE=1 SV=3	2	26155.6	87058.8	50747	2870.42	24824.1	2870.42	25674.6	2870.42	131973	13985.3	2870.42	2870.42	2870.42	219000	18613.4	16931	2870.42	318167	62096.8	2870.42	224299	2870.42
CXCL12	P48061	Stromal cell-derived factor 1 OS=Homo sapiens OX=9606 GN=CXCL12 PE=1 SV=1	1	39152	40648.6	2870.42	2870.42	100346	53493	66766.4	124774	2870.42	31789.1	2870.42	2870.42	108956	2870.42	69589.3	42363.7	2870.42	33026	2870.42	2870.42	55009.7	86060.5
PDGFD	Q9GZP0	Platelet-derived growth factor D OS=Homo sapiens OX=9606 GN=PDGFD PE=1 SV=1	1	54918.4	59341.7	161226	2870.42	154314	2870.42	66504.4	90669.1	2870.42	2870.42	2870.42	62118.9	75226.4	115017	55350.2	65129	39992.7	231220	2870.42	2870.42	2870.42	2870.42
HINT1	P49773	Histidine triad nucleotide-binding protein 1 OS=Homo sapiens OX=9606 GN=HINT1 PE=1 SV=2	1	39958.4	53887.9	22552.1	2870.42	68826.2	2870.42	33443.4	2870.42	211837	48573.2	2870.42	2870.42	34101.9	2870.42	15565.9	2870.42	157483	2870.42	2870.42	53223.2	204880	62142.5
IGLV2-14	P01704	Immunoglobulin lambda variable 2-14 OS=Homo sapiens OX=9606 GN=IGLV2-14 PE=1 SV=2	1	158220	162254	2870.42	2870.42	489567	189047	79702.8	196163	2870.42	289558	2870.42	326679	2870.42	21348.5	460065	659107	2870.42	2870.42	68787.8	2870.42	2870.42	398876
IGFBP6	P24592	Insulin-like growth factor-binding protein 6 OS=Homo sapiens OX=9606 GN=IGFBP6 PE=1 SV=1	1	115129	31434.1	2870.42	820183	63467.7	2870.42	92396.8	2870.42	62967.8	2870.42	97926.4	2870.42	2870.42	24551.3	2870.42	96270.8	43266.2	2870.42	2870.42	30786.2	55083.1	52901.4
TUBB4B	P68371	Tubulin beta-4B chain OS=Homo sapiens OX=9606 GN=TUBB4B PE=1 SV=1	2	17057	6891.62	2870.42	2870.42	144737	2870.42	2870.42	2870.42	2870.42	2870.42	2870.42	2870.42	2870.42	2870.42	2870.42	2870.42	2870.42	43082.4	2870.42	2870.42	2870.42	2870.42
SMOC1	Q9H4F8	SPARC-related modular calcium-binding protein 1 OS=Homo sapiens OX=9606 GN=SMOC1 PE=1 SV=1	1	10610	42274.9	2870.42	2870.42	2870.42	2870.42	2870.42	2870.42	2870.42	2870.42	80266.4	2870.42	2870.42	2870.42	2870.42	2870.42	2870.42	396915	2870.42	2870.42	2870.42	2870.42
PYCR3	Q53H96	Pyrroline-5-carboxylate reductase 3 OS=Homo sapiens OX=9606 GN=PYCR3 PE=1 SV=3	1	6052.42	16647.5	2870.42	2870.42	2870.42	2870.42	2870.42	2870.42	2870.42	2870.42	2870.42	34690.4	2870.42	2870.42	2870.42	2870.42	2870.42	2870.42	2870.42	2870.42	140641	2870.42
HK3	P52790	Hexokinase-3 OS=Homo sapiens OX=9606 GN=HK3 PE=1 SV=2	1	7180.94	33516.2	45975.6	2870.42	2870.42	2870.42	2870.42	2870.42	2870.42	2870.42	2870.42	2870.42	309328	2870.42	2870.42	2870.42	2870.42	2870.42	2870.42	2870.42	2870.42	2870.42
EIF4G1	Q04637	Eukaryotic translation initiation factor 4 gamma 1 OS=Homo sapiens OX=9606 GN=EIF4G1 PE=1 SV=4	1	4660.46	20243.9	20770.8	2870.42	2870.42	2870.42	2870.42	2870.42	2870.42	2870.42	2870.42	2870.42	176605	2870.42	2870.42	2870.42	2870.42	2870.42	2870.42	2870.42	2870.42	2870.42
MTMR1	Q13613	Myotubularin-related protein 1 OS=Homo sapiens OX=9606 GN=MTMR1 PE=1 SV=4	1	5593.5	34203.1	2870.42	2870.42	2870.42	2870.42	30101.2	2870.42	2870.42	2870.42	2870.42	2870.42	2870.42	2870.42	2870.42	316197	2870.42	2870.42	2870.42	2870.42	2870.42	2870.42
CCT7	Q99832	T-complex protein 1 subunit eta OS=Homo sapiens OX=9606 GN=CCT7 PE=1 SV=2	2	44301.8	21781.4	63889.2	2870.42	2870.42	2870.42	2870.42	356166	2870.42	2870.42	2870.42	2870.42	2870.42	2870.42	2870.42	2870.42	2870.42	2870.42	164482	2870.42	30369.3	2870.42
PCBP2	Q15366	Poly(rC)-binding protein 2 OS=Homo sapiens OX=9606 GN=PCBP2 PE=1 SV=1	2	36015.8	36671.5	2870.42	2870.42	109450	2870.42	2870.42	2870.42	227745	2870.42	2870.42	2870.42	214052	2870.42	2870.42	2870.42	2870.42	2870.42	2870.42	2870.42	129700	2870.42
VASP	P50552	Vasodilator-stimulated phosphoprotein OS=Homo sapiens OX=9606 GN=VASP PE=1 SV=3	2	15658.1	55414.3	59483.8	2870.42	2870.42	2870.42	2870.42	2870.42	2870.42	2870.42	2870.42	74134.2	501790	2870.42	29389.6	2870.42	2870.42	2870.42	2870.42	2870.42	2870.42	2870.42
MACROH2A2	Q9P0M6	Core histone macro-H2A.2 OS=Homo sapiens OX=9606 GN=MACROH2A2 PE=1 SV=3	1	14470.3	113642	2870.42	2870.42	2870.42	2870.42	2870.42	36759.8	2870.42	2870.42	2870.42	84980.3	1.04182e+06	2870.42	2870.42	2870.42	2870.42	2870.42	2870.42	2870.42	71632.8	2870.42
UBAC1	Q9BSL1	Ubiquitin-associated domain-containing protein 1 OS=Homo sapiens OX=9606 GN=UBAC1 PE=1 SV=1	1	28601.9	27836.8	2870.42	2870.42	134141	2870.42	2870.42	2870.42	128915	2870.42	2870.42	2870.42	2870.42	2870.42	2870.42	2870.42	2870.42	2870.42	2870.42	55694.3	199711	2870.42
TXNDC15	Q96J42	Thioredoxin domain-containing protein 15 OS=Homo sapiens OX=9606 GN=TXNDC15 PE=1 SV=1	1	9234.1	14542.1	2870.42	2870.42	2870.42	33411.9	2870.42	2870.42	2870.42	35965.8	2870.42	2870.42	2870.42	2870.42	50965.9	71491.7	2870.42	2870.42	2870.42	2870.42	2870.42	2870.42
CHGB	P05060	Secretogranin-1 OS=Homo sapiens OX=9606 GN=CHGB PE=1 SV=2	1	45937.5	25523	2870.42	2870.42	124898	2870.42	166155	2870.42	2870.42	2870.42	2870.42	148229	2870.42	66715.3	2870.42	66188.3	2870.42	2870.42	2870.42	2870.42	102234	2870.42
PRTN3	P24158	Myeloblastin OS=Homo sapiens OX=9606 GN=PRTN3 PE=1 SV=3	1	5600.67	11325.2	2870.42	10459.5	2870.42	11791.8	2870.42	2870.42	2870.42	13662.4	2870.42	2870.42	65469.1	2870.42	2870.42	19442.9	8247.04	2870.42	2870.42	2870.42	2870.42	2870.42
S100A6	P06703	Protein S100-A6 OS=Homo sapiens OX=9606 GN=S100A6 PE=1 SV=1	1	50025.8	19933	2870.42	295284	71197	2870.42	2870.42	2870.42	113684	2870.42	2870.42	2870.42	25205.1	2870.42	2870.42	109498	2870.42	2870.42	2870.42	2870.42	44533.3	2870.42
THPO	P40225	Thrombopoietin OS=Homo sapiens OX=9606 GN=THPO PE=1 SV=1	1	33438.5	25772	2870.42	114973	13932.9	2870.42	5740.84	2870.42	2870.42	2870.42	2870.42	182516	14201.9	2870.42	2870.42	2870.42	2870.42	15349.1	67504.7	143442	2870.42	2870.42
FTCD	O95954	Formimidoyltransferase-cyclodeaminase OS=Homo sapiens OX=9606 GN=FTCD PE=1 SV=2	1	65854.5	100138	77225	2870.42	2870.42	2870.42	2870.42	97853.2	198791	267454	2870.42	2870.42	2870.42	2870.42	412437	2870.42	121400	2870.42	2870.42	235207	215113	2870.42
PSMA4	P25789	Proteasome subunit alpha type-4 OS=Homo sapiens OX=9606 GN=PSMA4 PE=1 SV=1	2	74339.7	155911	170291	17148.7	188894	2870.42	176990	2870.42	2870.42	175722	2870.42	2870.42	643704	274305	2870.42	2870.42	259211	207688	159845	2870.42	2870.42	2870.42
PLXDC2	Q6UX71	Plexin domain-containing protein 2 OS=Homo sapiens OX=9606 GN=PLXDC2 PE=1 SV=1	1	56176.8	65186.5	2870.42	2870.42	76665.5	2870.42	100151	2870.42	104774	179154	86671.1	2870.42	2870.42	68351.8	157397	145654	2870.42	2870.42	2870.42	76573.1	189538	2870.42
GLA	P06280	Alpha-galactosidase A OS=Homo sapiens OX=9606 GN=GLA PE=1 SV=1	1	33433.2	46165.4	2870.42	2870.42	73331.2	41901.3	41526.8	2870.42	91884.5	2870.42	2870.42	71335.9	2870.42	85617.2	2870.42	2870.42	51276.8	116538	61776.7	2870.42	132093	2870.42
CCL16	O15467	C-C motif chemokine 16 OS=Homo sapiens OX=9606 GN=CCL16 PE=1 SV=1	1	70634.7	101794	137937	2870.42	2870.42	2870.42	87926.9	2870.42	132852	102057	231221	2870.42	2870.42	128470	51927.6	2870.42	218437	485535	2870.42	2870.42	119215	2870.42
EEF1A1	P68104	Elongation factor 1-alpha 1 OS=Homo sapiens OX=9606 GN=EEF1A1 PE=1 SV=1	4	296047	357839	607540	268889	723238	2870.42	2870.42	219059	572261	2870.42	2870.42	557999	1.98198e+06	2870.42	327011	2870.42	2870.42	154240	2870.42	403995	651348	48336.3
DCXR	Q7Z4W1	L-xylulose reductase OS=Homo sapiens OX=9606 GN=DCXR PE=1 SV=2	2	108246	101126	2870.42	50687.9	2870.42	2870.42	2870.42	173025	316995	374563	56788.2	98922.3	2870.42	197195	141303	2870.42	79990.5	2870.42	2870.42	223506	268582	89198.5
VCP	P55072	Transitional endoplasmic reticulum ATPase OS=Homo sapiens OX=9606 GN=VCP PE=1 SV=4	1	35093.5	34415	35866.9	2870.42	128336	68336.3	20890.4	2870.42	48174.4	2870.42	2870.42	37849.1	45799.4	2870.42	2870.42	17325.3	13186.3	2870.42	22768.4	82090.9	151498	2870.42
CCDC150	Q8NCX0	Coiled-coil domain-containing protein 150 OS=Homo sapiens OX=9606 GN=CCDC150 PE=1 SV=2	1	238376	125931	240521	2870.42	153459	2870.42	207600	1.08376e+06	2870.42	2870.42	162072	524865	162920	130828	2870.42	2870.42	131968	2870.42	110030	2870.42	409380	302705
SELL	P14151	L-selectin OS=Homo sapiens OX=9606 GN=SELL PE=1 SV=2	1	222478	237215	180743	274096	261864	2870.42	2870.42	80904	2870.42	1.06056e+06	355140	2870.42	313276	2870.42	2870.42	380389	255602	525321	494536	2870.42	391542	2870.42
MYH7	P12883	Myosin-7 OS=Homo sapiens OX=9606 GN=MYH7 PE=1 SV=5	4	286516	214485	406699	2870.42	53215.6	38651.4	1.30247e+06	2870.42	627099	275667	152752	2870.42	2870.42	65064.7	83120.9	774251	2870.42	2870.42	134835	83626.4	896615	98728.5
PLIN1	O60240	Perilipin-1 OS=Homo sapiens OX=9606 GN=PLIN1 PE=1 SV=2	3	524334	253991	896067	2870.42	2870.42	109116	411571	2.12572e+06	77461.3	563652	1.05114e+06	2870.42	2870.42	2870.42	350471	187529	139431	793892	2870.42	613186	359417	87374.3
IGHV1-18	A0A0C4DH31	Immunoglobulin heavy variable 1-18 OS=Homo sapiens OX=9606 GN=IGHV1-18 PE=3 SV=1	1	104893	203418	53679.2	2870.42	2870.42	2870.42	175703	139578	109405	151564	178276	232117	129849	380331	462069	124981	2870.42	485627	2870.42	2870.42	169079	273635
COL6A1	P12109	Collagen alpha-1(VI) chain OS=Homo sapiens OX=9606 GN=COL6A1 PE=1 SV=3	2	76121.1	78323.6	138324	2870.42	156751	2870.42	32725.3	2870.42	46240.6	211060	51058.6	116440	2870.42	175708	49752.2	217085	30529.3	149016	11479.9	2870.42	141054	2870.42
TIMP3	P35625	Metalloproteinase inhibitor 3 OS=Homo sapiens OX=9606 GN=TIMP3 PE=1 SV=2	2	62889.3	59024.5	45869.6	44667.9	85114.2	2870.42	31229.8	2870.42	197323	114766	2870.42	101310	107222	30365.1	2870.42	33671.6	41348.2	339178	2870.42	2870.42	10026.1	19822.8
IGLV3-19	P01714	Immunoglobulin lambda variable 3-19 OS=Homo sapiens OX=9606 GN=IGLV3-19 PE=1 SV=2	2	209800	436197	2870.42	323634	465501	2870.42	379902	126100	87771.4	185341	521139	2870.42	2870.42	230105	675218	1.41118e+06	2870.42	902390	2870.42	228881	311468	594115
CHST14	Q8NCH0	Carbohydrate sulfotransferase 14 OS=Homo sapiens OX=9606 GN=CHST14 PE=1 SV=2	1	54314.1	75145.3	79453.1	42758.1	112134	59883.6	2870.42	2870.42	91754.8	66873.2	2870.42	81674	2870.42	152623	104231	85535	112736	116380	112622	2870.42	58715.7	2870.42
LMNA	P02545	Prelamin-A/C OS=Homo sapiens OX=9606 GN=LMNA PE=1 SV=1	1	77426.4	114472	87687.3	2870.42	102464	72274.7	145796	2870.42	2870.42	134088	91458.2	131884	207809	97596.3	147053	264544	2870.42	135096	2870.42	139391	144617	2870.42
MMRN2	Q9H8L6	Multimerin-2 OS=Homo sapiens OX=9606 GN=MMRN2 PE=1 SV=2	1	164778	173669	264501	2870.42	216332	317550	2870.42	185530	2870.42	247138	261456	146664	73443.3	2870.42	296433	240703	354232	203409	220405	2870.42	339450	2870.42
SNCA	P37840	Alpha-synuclein OS=Homo sapiens OX=9606 GN=SNCA PE=1 SV=1	7	1.41467e+06	1.07624e+06	1.23029e+06	2870.42	4.29241e+06	912482	355144	109632	6.1882e+06	239027	2870.42	813735	354211	2870.42	1.6081e+06	645500	157090	262620	918046	3.02871e+06	3.78243e+06	2870.42
HSP90AB1	P08238	Heat shock protein HSP 90-beta OS=Homo sapiens OX=9606 GN=HSP90AB1 PE=1 SV=4	2	308057	591912	52926.9	267401	2870.42	2870.42	227545	361588	832273	750553	158635	423910	4.2484e+06	319228	202658	2870.42	2870.42	133311	244249	128385	562672	74471.1
NUCB2	P80303	Nucleobindin-2 OS=Homo sapiens OX=9606 GN=NUCB2 PE=1 SV=3	2	124352	178181	202012	2870.42	124179	160143	67436.8	257225	321981	46622	2870.42	58177.7	437227	55234.6	40836.1	358192	2870.42	654230	88337.1	72072.2	2870.42	69940.6
RETN	Q9HD89	Resistin OS=Homo sapiens OX=9606 GN=RETN PE=1 SV=1	1	118625	189080	151175	2870.42	201062	115372	67028.2	2870.42	286768	89244.4	167929	101932	182036	296777	269815	235918	2870.42	539497	168469	2870.42	114673	77877.7
HLA-C	P10321	HLA class I histocompatibility antigen, C alpha chain OS=Homo sapiens OX=9606 GN=HLA-C PE=1 SV=3	3	271580	341307	90211	344195	438098	252089	55403.4	892461	59840	220444	2870.42	360190	244081	344933	2870.42	361522	428758	369022	447976	504714	337189	372003
PRDX2	P32119	Peroxiredoxin-2 OS=Homo sapiens OX=9606 GN=PRDX2 PE=1 SV=5	5	433193	167719	457519	346657	670123	516258	193639	110263	1.51668e+06	237511	2870.42	280408	227247	133585	155700	73438.9	146489	132488	145274	2870.42	631332	28765.1
IGLV8-61	A0A075B6I0	Immunoglobulin lambda variable 8-61 OS=Homo sapiens OX=9606 GN=IGLV8-61 PE=3 SV=7	4	2.4382e+07	3.12053e+07	4.05561e+07	1.73417e+07	8.38724e+07	1.7222e+07	2.86508e+07	2870.42	4.3183e+07	34314.5	1.29504e+07	6112.9	4.65748e+06	6.4744e+07	3.10156e+07	1.86096e+07	2870.42	9.21883e+07	34151.8	1.00371e+07	3.10376e+07	5.97264e+07
IGLV3-10	A0A075B6K4	Immunoglobulin lambda variable 3-10 OS=Homo sapiens OX=9606 GN=IGLV3-10 PE=3 SV=2	4	544317	849989	666853	2870.42	462894	103185	505688	1.09372e+06	781942	446340	633829	745852	325077	1.76505e+06	2870.42	1.72001e+06	309459	585042	1.14144e+06	558308	694965	1.39766e+06
HRNR	Q86YZ3	Hornerin OS=Homo sapiens OX=9606 GN=HRNR PE=1 SV=2	3	197797	393822	14129.4	776667	538737	212220	45763.9	106114	179841	18897	82732.6	2870.42	215573	83705.1	1.29187e+06	429016	172715	181630	205480	736725	2870.42	618632
B2M	P61769	Beta-2-microglobulin OS=Homo sapiens OX=9606 GN=B2M PE=1 SV=1	2	286459	273367	247437	436931	334568	2870.42	477842	186352	305127	638296	51321.4	183848	211276	316942	292673	253820	2870.42	703250	282237	107968	36344	526291
LOXL3	P58215	Lysyl oxidase homolog 3 OS=Homo sapiens OX=9606 GN=LOXL3 PE=1 SV=1	2	401030	656436	250209	2870.42	1.60465e+06	500446	128058	445823	533986	107076	278865	158317	249831	584375	2870.42	1.32482e+06	467347	800781	811878	773718	356428	1.19231e+06
LILRA3	Q8N6C8	Leukocyte immunoglobulin-like receptor subfamily A member 3 OS=Homo sapiens OX=9606 GN=LILRA3 PE=1 SV=3	2	473831	927729	1.25909e+06	532573	700788	2870.42	266228	311169	495694	322039	177234	670619	2.60475e+06	301525	452687	2.02562e+06	14171.1	2870.42	372132	1.09623e+06	1.33029e+06	1.07701e+06
QPCT	Q16769	Glutaminyl-peptide cyclotransferase OS=Homo sapiens OX=9606 GN=QPCT PE=1 SV=1	2	249670	325889	164122	239354	414930	182757	182581	2870.42	601123	332110	109044	267812	417810	630190	364614	550628	128360	421272	142462	2870.42	363559	237125
SERPINA7	P05543	Thyroxine-binding globulin OS=Homo sapiens OX=9606 GN=SERPINA7 PE=1 SV=2	1	205480	309960	225948	196012	195216	153053	247989	2870.42	311297	234107	176852	311456	2870.42	438624	688152	351641	283664	273113	196003	178235	256358	430935
RAC2	P15153	Ras-related C3 botulinum toxin substrate 2 OS=Homo sapiens OX=9606 GN=RAC2 PE=1 SV=1	1	80354.5	135298	83264.3	2870.42	79507.3	99251.4	73855	70563.8	79280.7	70245.1	142319	102388	687257	156161	56946.5	87352.4	70388.8	94367.6	82106.3	2870.42	51971.8	63557.5
SPP1	P10451	Osteopontin OS=Homo sapiens OX=9606 GN=SPP1 PE=1 SV=1	1	469806	590208	474964	613303	610545	406818	651284	2870.42	541795	205939	241386	949157	686326	700944	956844	2870.42	684509	737467	585920	467854	643122	436227
ATRN	O75882	Attractin OS=Homo sapiens OX=9606 GN=ATRN PE=1 SV=2	1	285740	198073	192793	459330	430254	296922	192243	323587	329581	277456	352367	2870.42	215737	210182	297097	281662	293261	183653	84486	194842	216942	2870.42
FGFR1	P11362	Fibroblast growth factor receptor 1 OS=Homo sapiens OX=9606 GN=FGFR1 PE=1 SV=3	1	42299.5	58099.8	39140	34379.8	43300.8	2870.42	58418.2	33492.5	58877	60757.1	37144.5	54614.5	35163.7	47517.2	66112.6	77028	33763.5	111013	30717.8	136369	40442.2	2870.42
CUBN	O60494	Cubilin OS=Homo sapiens OX=9606 GN=CUBN PE=1 SV=5	1	1.08236e+06	1.95747e+06	562062	754458	2870.42	2.0444e+06	2.03305e+06	140583	2.48989e+06	903113	704427	1.18872e+06	949843	7.22183e+06	1.52829e+06	4.41553e+06	1.99563e+06	2.02709e+06	217318	2870.42	319081	897170
FGFBP2	Q9BYJ0	Fibroblast growth factor-binding protein 2 OS=Homo sapiens OX=9606 GN=FGFBP2 PE=1 SV=1	1	164392	143042	196995	124344	181285	93915.4	214296	2870.42	201548	220047	185486	223134	101045	223252	149138	134794	188284	214575	2870.42	106681	156672	153107
APOB	P04114	Apolipoprotein B-100 OS=Homo sapiens OX=9606 GN=APOB PE=1 SV=2	280	2.72596e+09	2.99025e+09	2.41784e+09	3.01802e+09	3.25407e+09	1.91857e+09	2.10178e+09	2.58654e+09	2.3476e+09	3.99202e+09	2.92184e+09	2.70129e+09	2.12814e+09	4.00297e+09	2.44092e+09	2.76665e+09	5.12309e+09	3.18739e+09	2.78425e+09	2.07041e+09	3.17036e+09	2.22838e+09
C3	P01024	Complement C3 OS=Homo sapiens OX=9606 GN=C3 PE=1 SV=2	169	1.23501e+10	1.27153e+10	9.17604e+09	1.37273e+10	1.16092e+10	1.08602e+10	1.17794e+10	1.03526e+10	1.47059e+10	1.50105e+10	1.34155e+10	1.28643e+10	1.62123e+10	1.19335e+10	1.23315e+10	1.29959e+10	1.19155e+10	1.02494e+10	1.12329e+10	1.24772e+10	1.20127e+10	1.57923e+10
C4B	P0C0L5	Complement C4-B OS=Homo sapiens OX=9606 GN=C4B PE=1 SV=2	4	2.46655e+08	2.72168e+08	3.20444e+06	2.6808e+08	3.87064e+08	1.89854e+08	3.61395e+08	1.70563e+08	3.06007e+08	1.5034e+08	3.33632e+08	2.96415e+08	4.28186e+08	2.11225e+08	9.17762e+07	2.54326e+08	5.44907e+08	2.52973e+08	2.21754e+08	1.87054e+08	1.11548e+08	4.17931e+08
C4A	P0C0L4	Complement C4-A OS=Homo sapiens OX=9606 GN=C4A PE=1 SV=2	5	6.47742e+09	5.97554e+09	3.97449e+09	7.20058e+09	5.61409e+09	8.58163e+09	5.82697e+09	5.74621e+09	6.94587e+09	5.31516e+09	6.44129e+09	9.12789e+09	8.38963e+09	5.6955e+09	3.99253e+09	4.4823e+09	5.93873e+09	5.04836e+09	8.26906e+09	4.77293e+09	5.13717e+09	8.02918e+09
FN1	P02751	Fibronectin OS=Homo sapiens OX=9606 GN=FN1 PE=1 SV=5	116	2.04841e+09	2.37653e+09	2.87282e+09	5.9269e+08	1.50937e+09	2.37181e+09	1.85772e+09	1.99752e+09	1.77154e+09	2.47586e+09	2.58791e+09	2.44687e+09	1.86625e+09	2.09156e+09	3.29399e+09	1.51753e+09	3.47327e+09	2.30573e+09	1.95488e+09	2.83032e+09	2.55668e+09	1.87507e+09
APOA1	P02647	Apolipoprotein A-I OS=Homo sapiens OX=9606 GN=APOA1 PE=1 SV=1	72	4.17191e+10	4.29012e+10	4.83531e+10	3.91365e+10	4.22731e+10	4.37858e+10	4.88745e+10	3.13505e+10	3.94227e+10	3.8753e+10	4.13702e+10	4.38713e+10	3.90489e+10	3.86858e+10	4.08124e+10	4.41084e+10	4.17601e+10	3.99389e+10	4.38408e+10	5.14397e+10	4.54979e+10	4.38794e+10
APOA4	P06727	Apolipoprotein A-IV OS=Homo sapiens OX=9606 GN=APOA4 PE=1 SV=4	88	6.15848e+09	5.18935e+09	4.59013e+09	4.38191e+09	6.41157e+09	7.72764e+09	5.74839e+09	7.81353e+09	7.91512e+09	4.30718e+09	8.46831e+09	4.22097e+09	2.3706e+09	3.85529e+09	6.07139e+09	1.01263e+10	4.58215e+09	5.87561e+09	4.88669e+09	2.44399e+09	6.48256e+09	5.19891e+09
FGA	P02671	Fibrinogen alpha chain OS=Homo sapiens OX=9606 GN=FGA PE=1 SV=2	69	9.76975e+08	2.02674e+08	1.26798e+08	8.84939e+09	9.49551e+07	1.56158e+08	1.01099e+08	8.85088e+07	1.02923e+08	4.72086e+07	9.33697e+07	1.09337e+08	4.58124e+08	1.60933e+08	1.90728e+08	1.48039e+08	1.93922e+08	2.21012e+08	1.94457e+08	1.69523e+08	1.20438e+08	1.69563e+08
CFH	P08603	Complement factor H OS=Homo sapiens OX=9606 GN=CFH PE=1 SV=4	73	1.61264e+09	1.50556e+09	1.61296e+09	1.60556e+09	1.53476e+09	1.31528e+09	1.61621e+09	1.24541e+09	1.73867e+09	2.04569e+09	2.08037e+09	1.33145e+09	1.78558e+09	1.62605e+09	1.36342e+09	1.26014e+09	1.67175e+09	1.45193e+09	1.64308e+09	1.4549e+09	1.3607e+09	1.43805e+09
ITIH4	Q14624	Inter-alpha-trypsin inhibitor heavy chain H4 OS=Homo sapiens OX=9606 GN=ITIH4 PE=1 SV=4	57	1.36335e+09	1.46492e+09	1.5455e+09	1.49544e+09	1.41811e+09	1.42792e+09	1.47909e+09	1.1393e+09	1.17208e+09	1.38107e+09	1.03789e+09	1.53705e+09	1.9337e+09	1.73186e+09	9.54826e+08	1.36756e+09	1.29871e+09	1.72462e+09	1.86073e+09	1.07048e+09	1.14816e+09	1.55859e+09
APOE	P02649	Apolipoprotein E OS=Homo sapiens OX=9606 GN=APOE PE=1 SV=1	62	9.87055e+09	9.3503e+09	8.47246e+09	5.69252e+09	1.07507e+10	8.97058e+09	6.38461e+09	2.33147e+10	8.80286e+09	9.89604e+09	8.08204e+09	8.33894e+09	6.5193e+09	1.07908e+10	1.10649e+10	9.62657e+09	9.95271e+09	1.08392e+10	7.07452e+09	1.2275e+10	8.73924e+09	6.62063e+09
GSN	P06396	Gelsolin OS=Homo sapiens OX=9606 GN=GSN PE=1 SV=1	63	7.11651e+08	6.85764e+08	9.2318e+08	8.77271e+08	6.96537e+08	5.31615e+08	7.42662e+08	4.22572e+08	7.84981e+08	8.06048e+08	6.62463e+08	6.6918e+08	3.61115e+08	6.08176e+08	9.64668e+08	1.15877e+09	4.61113e+08	6.38688e+08	6.01837e+08	4.00307e+08	6.68693e+08	9.94272e+08
CLU	P10909	Clusterin OS=Homo sapiens OX=9606 GN=CLU PE=1 SV=1	50	6.9273e+09	6.73003e+09	7.03569e+09	5.57254e+09	6.71601e+09	7.0751e+09	6.8495e+09	7.55078e+09	6.80263e+09	7.68042e+09	7.10359e+09	6.8867e+09	6.2448e+09	7.77347e+09	7.67283e+09	5.81937e+09	6.43141e+09	5.95802e+09	7.58226e+09	6.27523e+09	6.73811e+09	6.80476e+09
ALB	P02768	Albumin OS=Homo sapiens OX=9606 GN=ALB PE=1 SV=2	60	1.72142e+09	1.56641e+09	1.78726e+09	2.39085e+09	1.75983e+09	1.17618e+09	1.72926e+09	1.1707e+09	1.61695e+09	2.14859e+09	2.00517e+09	1.42945e+09	1.53026e+09	2.13503e+09	1.88906e+09	1.51295e+09	1.41621e+09	1.62361e+09	1.52055e+09	6.47069e+08	1.47329e+09	1.91602e+09
F2	P00734	Prothrombin OS=Homo sapiens OX=9606 GN=F2 PE=1 SV=2	44	1.44382e+09	1.66281e+09	1.63027e+09	8.50454e+08	1.62753e+09	1.89122e+09	1.13294e+09	2.02775e+09	1.74664e+09	8.88857e+08	1.1288e+09	1.51376e+09	1.39453e+09	1.74866e+09	1.14077e+09	8.90582e+08	2.15138e+09	1.85042e+09	2.18685e+09	2.26292e+09	1.61077e+09	1.39118e+09
CP	P00450	Ceruloplasmin OS=Homo sapiens OX=9606 GN=CP PE=1 SV=1	41	1.48489e+08	1.80754e+08	1.11714e+08	2.64934e+08	1.13832e+08	1.45133e+08	1.33448e+08	6.10288e+07	1.34115e+08	1.83677e+08	1.57486e+08	1.79522e+08	2.43366e+08	1.64406e+08	1.94383e+08	2.83432e+08	1.15185e+08	1.71933e+08	1.53668e+08	1.40476e+08	1.40948e+08	1.99741e+08
SERPINC1	P01008	Antithrombin-III OS=Homo sapiens OX=9606 GN=SERPINC1 PE=1 SV=1	41	7.63308e+08	9.42653e+08	1.08041e+09	1.57018e+08	1.03779e+09	1.08456e+09	4.80147e+08	8.84573e+08	1.22117e+09	2.18912e+08	6.58246e+08	8.10253e+08	8.65779e+08	1.23313e+09	5.89261e+08	6.59341e+08	1.09779e+09	1.37863e+09	1.21006e+09	8.8336e+08	8.25504e+08	6.83673e+08
ITIH2	P19823	Inter-alpha-trypsin inhibitor heavy chain H2 OS=Homo sapiens OX=9606 GN=ITIH2 PE=1 SV=2	46	8.19201e+08	5.82839e+08	1.52736e+09	5.07489e+08	8.77143e+08	8.44911e+08	7.66992e+08	7.70646e+08	5.60803e+08	6.97269e+08	8.41807e+08	7.97596e+08	3.43686e+08	7.4088e+08	5.15651e+08	3.87782e+08	7.12399e+08	5.83502e+08	7.75628e+08	6.40542e+08	7.00461e+08	4.27863e+08
C5	P01031	Complement C5 OS=Homo sapiens OX=9606 GN=C5 PE=1 SV=4	46	6.51506e+08	6.88964e+08	5.89673e+08	6.33982e+08	5.534e+08	6.82747e+08	6.61789e+08	5.47417e+08	7.21253e+08	7.35304e+08	7.64693e+08	6.24805e+08	9.29099e+08	7.05439e+08	6.64506e+08	6.74369e+08	6.15287e+08	4.80543e+08	8.72134e+08	6.77603e+08	5.87163e+08	6.83497e+08
IGKC	P01834	Immunoglobulin kappa constant OS=Homo sapiens OX=9606 GN=IGKC PE=1 SV=2	14	4.90772e+08	5.40854e+08	2.35856e+08	5.39326e+08	6.27607e+08	3.56068e+08	4.6527e+08	4.95754e+08	5.39479e+08	5.8381e+08	5.31786e+08	5.32763e+08	5.42955e+08	5.13379e+08	5.95254e+08	8.858e+08	2.85017e+08	7.9386e+08	2.91336e+08	3.47414e+08	4.81095e+08	6.72435e+08
F5	P12259	Coagulation factor V OS=Homo sapiens OX=9606 GN=F5 PE=1 SV=4	53	7.90314e+07	7.73406e+07	7.98515e+07	5.37054e+07	7.92144e+07	7.66733e+07	1.1445e+08	5.21731e+07	7.03921e+07	8.35335e+07	9.32735e+07	8.70474e+07	9.15656e+07	9.64077e+07	8.41814e+07	5.16525e+07	9.3239e+07	8.34846e+07	5.67769e+07	5.96491e+07	8.77496e+07	6.86994e+07
APOA2	P02652	Apolipoprotein A-II OS=Homo sapiens OX=9606 GN=APOA2 PE=1 SV=1	16	4.45685e+09	3.8332e+09	5.5095e+09	4.75763e+09	4.02023e+09	4.16591e+09	4.72663e+09	4.70375e+09	4.22867e+09	4.46526e+09	4.05831e+09	3.93262e+09	2.90417e+09	5.02941e+09	4.95332e+09	3.25591e+09	3.9834e+09	3.72178e+09	4.70167e+09	3.51318e+09	2.88848e+09	3.3807e+09
IGHG1	P01857	Immunoglobulin heavy constant gamma 1 OS=Homo sapiens OX=9606 GN=IGHG1 PE=1 SV=1	14	4.87964e+08	4.79792e+08	3.19972e+08	4.78589e+08	5.96131e+08	4.73442e+08	4.14927e+08	3.76136e+08	4.28995e+08	4.59607e+08	4.93211e+08	8.38631e+08	4.59302e+08	5.58147e+08	4.93693e+08	7.53775e+08	3.58787e+08	6.68191e+08	3.92085e+08	2.34065e+08	4.43264e+08	4.36613e+08
IGHM	P01871	Immunoglobulin heavy constant mu OS=Homo sapiens OX=9606 GN=IGHM PE=1 SV=4	28	7.97316e+08	1.10051e+09	1.44243e+09	4.03962e+08	8.17632e+08	4.49191e+08	1.26316e+09	8.65075e+08	6.3748e+08	5.83297e+08	3.08061e+08	1.20288e+09	5.06886e+08	1.1375e+09	1.38602e+09	1.04863e+09	7.79243e+08	1.48812e+09	6.45812e+08	6.5169e+08	1.06517e+09	2.29607e+09
THBS1	P07996	Thrombospondin-1 OS=Homo sapiens OX=9606 GN=THBS1 PE=1 SV=2	39	7.86582e+07	8.68219e+07	7.94481e+07	5.87338e+07	1.43846e+08	8.55193e+07	4.37887e+07	6.99908e+07	1.54024e+08	1.66751e+07	4.45071e+07	9.00493e+07	6.79386e+07	9.60682e+07	4.88586e+07	9.71359e+07	6.59891e+07	1.18439e+08	1.29153e+08	6.5927e+07	1.06168e+08	7.25423e+07
PLG	P00747	Plasminogen OS=Homo sapiens OX=9606 GN=PLG PE=1 SV=2	35	2.78112e+08	1.99829e+08	2.57818e+08	1.14651e+09	1.67029e+08	1.99509e+08	1.6388e+08	1.11397e+08	1.81346e+08	2.09499e+08	1.99238e+08	1.44892e+08	2.31211e+08	2.47642e+08	2.2601e+08	1.8799e+08	1.7993e+08	2.1238e+08	1.96192e+08	1.43787e+08	1.85488e+08	1.87658e+08
VTN	P04004	Vitronectin OS=Homo sapiens OX=9606 GN=VTN PE=1 SV=1	20	2.70314e+09	2.78129e+09	1.87534e+09	2.0062e+09	2.54948e+09	2.21312e+09	2.45944e+09	2.7398e+09	2.85842e+09	4.07771e+09	3.03501e+09	3.21688e+09	3.38712e+09	2.75352e+09	2.70225e+09	2.0338e+09	2.56204e+09	2.8493e+09	3.0557e+09	2.75958e+09	3.57084e+09	2.13872e+09
C6	P13671	Complement component C6 OS=Homo sapiens OX=9606 GN=C6 PE=1 SV=3	35	8.22241e+07	9.27362e+07	7.67436e+07	1.01171e+08	7.04516e+07	7.83447e+07	8.20791e+07	9.1278e+07	7.78311e+07	8.17227e+07	8.98586e+07	7.27607e+07	1.3299e+08	1.19671e+08	5.66967e+07	5.55188e+07	9.89325e+07	7.72316e+07	1.20429e+08	8.06852e+07	9.82528e+07	8.6954e+07
A2M	P01023	Alpha-2-macroglobulin OS=Homo sapiens OX=9606 GN=A2M PE=1 SV=3	31	8.65815e+07	8.64941e+07	7.03631e+07	1.06107e+08	6.81318e+07	5.90171e+07	1.03994e+08	3.58869e+07	5.26802e+07	1.39013e+08	1.11631e+08	1.18991e+08	7.29183e+07	9.28394e+07	9.21692e+07	1.52229e+08	7.67646e+07	8.6812e+07	7.71332e+07	5.03286e+07	6.56997e+07	9.80475e+07
PROS1	P07225	Vitamin K-dependent protein S OS=Homo sapiens OX=9606 GN=PROS1 PE=1 SV=1	26	2.26664e+08	2.00635e+08	2.78392e+08	2.35814e+08	2.22234e+08	2.02252e+08	2.43687e+08	1.8825e+08	2.02057e+08	2.30289e+08	2.20111e+08	2.43551e+08	2.2817e+08	2.11661e+08	1.61943e+08	1.99266e+08	2.62442e+08	1.98881e+08	2.57234e+08	1.14389e+08	1.63861e+08	2.08503e+08
SAA1	P0DJI8	Serum amyloid A-1 protein OS=Homo sapiens OX=9606 GN=SAA1 PE=1 SV=1	8	4.7572e+07	2.87639e+08	2.8976e+07	8.57027e+07	2.95725e+07	1.05113e+07	7.04634e+06	3.12185e+07	8.48704e+07	1.8551e+07	8.99953e+06	1.70272e+08	2.56628e+09	1.19223e+07	8.95476e+06	1.83639e+07	3.04797e+06	2.9915e+07	1.53708e+08	2.7229e+07	3.04446e+07	2.65284e+07
IGHG3	P01860	Immunoglobulin heavy constant gamma 3 OS=Homo sapiens OX=9606 GN=IGHG3 PE=1 SV=2	6	2.87205e+07	3.01418e+07	1.88613e+07	2.90741e+07	2.57327e+07	2.31942e+07	1.51881e+07	3.70534e+07	3.37789e+07	2.55857e+07	2.85978e+07	5.0139e+07	1.60059e+07	2.63671e+07	2.87162e+07	3.41107e+07	3.48711e+07	4.08072e+07	1.8109e+07	1.34535e+07	6.36053e+07	2.53717e+07
HP	P00738	Haptoglobin OS=Homo sapiens OX=9606 GN=HP PE=1 SV=1	14	1.75006e+08	1.91187e+08	2.45546e+08	3.72607e+08	1.29581e+08	2.13966e+08	1.68769e+08	1.30368e+08	1.00249e+08	1.21799e+08	1.32721e+08	1.34453e+08	2.99018e+08	1.02574e+08	6.29272e+07	2.55944e+08	1.93346e+08	2.81842e+08	2.84405e+08	1.2155e+08	1.03006e+08	2.07258e+08
VWF	P04275	von Willebrand factor OS=Homo sapiens OX=9606 GN=VWF PE=1 SV=4	30	5.0503e+07	5.10277e+07	6.4805e+07	2.4724e+07	4.00285e+07	3.30098e+07	7.81736e+07	5.16884e+07	4.57649e+07	5.662e+07	8.04155e+07	2.98006e+07	4.24995e+07	3.85084e+07	5.64827e+07	4.06678e+07	3.96009e+07	5.29333e+07	8.0629e+07	5.22025e+07	4.3295e+07	6.34579e+07
SAA2	P0DJI9	Serum amyloid A-2 protein OS=Homo sapiens OX=9606 GN=SAA2 PE=1 SV=1	9	2.86336e+07	1.84328e+08	2.41976e+07	4.96281e+07	1.10215e+07	9.66864e+06	8.49604e+06	3.03702e+07	3.3235e+07	1.05705e+07	1.084e+07	9.83087e+07	1.63037e+09	8.20851e+06	7.50092e+06	1.04703e+07	5.56701e+06	4.36822e+07	9.88499e+07	1.61715e+07	1.00134e+07	1.24424e+07
APOL1	O14791	Apolipoprotein L1 OS=Homo sapiens OX=9606 GN=APOL1 PE=1 SV=5	26	2.50596e+08	2.34518e+08	2.52502e+08	2.67709e+08	3.26325e+08	1.69281e+08	1.91763e+08	2.55838e+08	2.84934e+08	3.45011e+08	2.10729e+08	2.0187e+08	2.48977e+08	2.06158e+08	2.92541e+08	1.70409e+08	2.28431e+08	2.29606e+08	1.7241e+08	2.05169e+08	2.96464e+08	2.95011e+08
ITIH1	P19827	Inter-alpha-trypsin inhibitor heavy chain H1 OS=Homo sapiens OX=9606 GN=ITIH1 PE=1 SV=3	27	2.98648e+08	1.7965e+08	5.20877e+08	2.25895e+08	3.03131e+08	2.73912e+08	2.74223e+08	2.75295e+08	1.71861e+08	2.99755e+08	3.39143e+08	3.02387e+08	1.07773e+08	2.64828e+08	1.0323e+08	1.36675e+08	2.25008e+08	1.85499e+08	2.30368e+08	2.10245e+08	2.11285e+08	1.21588e+08
HSP90B1	P14625	Endoplasmin OS=Homo sapiens OX=9606 GN=HSP90B1 PE=1 SV=1	28	3.42201e+07	3.83928e+07	3.24721e+07	2.76686e+07	3.07898e+07	4.10779e+07	3.15327e+07	2.88161e+07	4.35538e+07	3.54909e+07	4.22076e+07	2.85913e+07	3.94451e+07	4.01114e+07	3.50808e+07	4.02446e+07	3.7324e+07	4.35773e+07	2.63025e+07	3.64617e+07	4.55104e+07	3.98698e+07
C1S	P09871	Complement C1s subcomponent OS=Homo sapiens OX=9606 GN=C1S PE=1 SV=1	27	3.71382e+08	4.0125e+08	4.4399e+08	3.98155e+08	3.9537e+08	2.68838e+08	4.07362e+08	3.68733e+08	4.1284e+08	4.63969e+08	3.42234e+08	2.1233e+08	4.78409e+08	4.52718e+08	3.46067e+08	3.74224e+08	3.61971e+08	4.21045e+08	4.52173e+08	3.27949e+08	4.52727e+08	3.45217e+08
SERPINA1	P01009	Alpha-1-antitrypsin OS=Homo sapiens OX=9606 GN=SERPINA1 PE=1 SV=3	22	6.64826e+07	8.37677e+07	6.93811e+07	1.6777e+08	4.86303e+07	5.73725e+07	6.25629e+07	3.79892e+07	5.42673e+07	6.50764e+07	4.98159e+07	5.19612e+07	1.22853e+08	9.7559e+07	9.21925e+07	9.50923e+07	4.85096e+07	1.32945e+08	8.18841e+07	5.29976e+07	6.21035e+07	5.15403e+07
FGB	P02675	Fibrinogen beta chain OS=Homo sapiens OX=9606 GN=FGB PE=1 SV=2	24	1.56054e+08	6.10681e+06	1.91082e+06	1.53175e+09	3.43484e+06	3.94675e+06	2.24114e+06	2.02885e+06	2.44036e+06	3.43923e+06	4.29713e+06	5.05214e+06	1.22747e+07	5.26464e+06	6.04014e+06	7.14261e+06	9.53623e+06	6.3807e+06	3.56379e+06	5.38826e+06	2.71176e+06	2.76519e+06
SAA4	P35542	Serum amyloid A-4 protein OS=Homo sapiens OX=9606 GN=SAA4 PE=1 SV=2	15	8.32849e+08	1.03032e+09	1.00388e+09	1.01225e+09	8.05771e+08	8.58263e+08	9.03001e+08	4.91243e+08	9.02966e+08	8.14878e+08	8.20718e+08	7.15524e+08	2.17211e+09	9.0234e+08	7.41683e+08	7.82891e+08	7.74486e+08	1.70202e+09	9.27534e+08	5.70407e+08	6.49719e+08	1.08004e+09
C9	P02748	Complement component C9 OS=Homo sapiens OX=9606 GN=C9 PE=1 SV=2	25	3.71586e+08	4.11893e+08	2.56094e+08	5.42534e+08	3.17165e+08	3.91075e+08	4.3983e+08	2.61724e+08	3.29175e+08	3.99084e+08	3.70147e+08	4.09034e+08	5.7481e+08	4.25007e+08	2.37593e+08	4.28891e+08	3.65848e+08	4.71535e+08	5.07149e+08	3.21177e+08	4.17913e+08	3.69003e+08
HRG	P04196	Histidine-rich glycoprotein OS=Homo sapiens OX=9606 GN=HRG PE=1 SV=1	24	1.31548e+08	1.36455e+08	1.18367e+08	2.1814e+08	1.28202e+08	9.47626e+07	1.43694e+08	4.40109e+07	1.52337e+08	2.09394e+08	1.31445e+08	7.51247e+07	1.27302e+08	1.40335e+08	1.72342e+08	2.13011e+08	4.94605e+07	8.44507e+07	1.287e+08	1.82023e+08	1.05071e+08	1.61859e+08
ITIH3	Q06033	Inter-alpha-trypsin inhibitor heavy chain H3 OS=Homo sapiens OX=9606 GN=ITIH3 PE=1 SV=2	22	7.12492e+07	1.03517e+08	7.96252e+07	6.55741e+07	4.75551e+07	7.88258e+07	6.83888e+07	4.94121e+07	7.33486e+07	7.23914e+07	1.04579e+08	7.27913e+07	1.46448e+08	1.24974e+08	7.53178e+07	5.10155e+07	1.01545e+08	2.21076e+08	8.07166e+07	7.62337e+07	7.47661e+07	8.30731e+07
CFB	P00751	Complement factor B OS=Homo sapiens OX=9606 GN=CFB PE=1 SV=2	29	1.7181e+08	1.67771e+08	1.83059e+08	1.63355e+08	2.08679e+08	1.40326e+08	1.97969e+08	1.77333e+08	1.73729e+08	2.0691e+08	1.59825e+08	1.06911e+08	2.54549e+08	1.98229e+08	1.31156e+08	1.26384e+08	1.43488e+08	1.60455e+08	1.77791e+08	1.46882e+08	1.43341e+08	1.95431e+08
ACTB	P60709	Actin, cytoplasmic 1 OS=Homo sapiens OX=9606 GN=ACTB PE=1 SV=1	5	4.34258e+07	6.5285e+07	4.66951e+07	4.62055e+07	3.64521e+07	3.21259e+07	4.17544e+07	3.90823e+07	6.41713e+07	3.27297e+07	3.83066e+07	5.67348e+07	1.9581e+08	5.3737e+07	3.81183e+07	7.08924e+07	4.04122e+07	6.56906e+07	4.89048e+07	3.83035e+07	5.08719e+07	5.01096e+07
HSPA5	P11021	Endoplasmic reticulum chaperone BiP OS=Homo sapiens OX=9606 GN=HSPA5 PE=1 SV=2	28	1.32668e+07	1.4285e+07	1.43046e+07	1.38133e+07	1.38915e+07	1.16367e+07	1.21278e+07	1.04092e+07	1.46661e+07	1.67514e+07	1.4409e+07	1.06582e+07	1.51235e+07	1.59183e+07	1.27754e+07	1.26545e+07	1.55229e+07	1.78061e+07	1.71618e+07	1.01605e+07	1.33692e+07	1.23573e+07
APOC1	P02654	Apolipoprotein C-I OS=Homo sapiens OX=9606 GN=APOC1 PE=1 SV=1	15	2.00463e+09	1.90279e+09	1.87648e+09	1.90975e+09	1.44966e+09	2.96693e+09	1.56911e+09	2.20451e+09	2.07044e+09	2.05761e+09	2.49669e+09	1.44517e+09	1.41092e+09	2.74126e+09	2.12949e+09	1.76046e+09	2.28529e+09	1.99078e+09	1.69736e+09	1.66416e+09	1.62418e+09	1.72398e+09
IGLC3	P0DOY3	Immunoglobulin lambda constant 3 OS=Homo sapiens OX=9606 GN=IGLC3 PE=1 SV=1	7	8.22316e+07	9.16986e+07	7.1714e+07	5.81948e+07	1.16075e+08	5.84186e+07	8.78474e+07	9.24805e+07	8.39083e+07	7.82692e+07	8.56167e+07	8.97917e+07	6.46567e+07	9.91989e+07	1.42388e+08	1.00225e+08	3.86154e+07	1.70695e+08	4.00028e+07	6.0189e+07	1.06927e+08	9.4088e+07
QSOX1	O00391	Sulfhydryl oxidase 1 OS=Homo sapiens OX=9606 GN=QSOX1 PE=1 SV=3	23	2.85176e+07	2.93293e+07	2.46043e+07	1.78136e+07	2.98348e+07	2.2418e+07	2.77125e+07	2.00571e+07	3.29703e+07	4.70753e+07	3.09465e+07	3.17437e+07	2.69809e+07	3.62649e+07	4.82596e+07	2.76715e+07	2.56112e+07	4.19493e+07	2.40293e+07	1.68776e+07	2.71666e+07	1.84819e+07
TTR	P02766	Transthyretin OS=Homo sapiens OX=9606 GN=TTR PE=1 SV=1	10	1.93161e+08	1.71827e+08	1.56121e+08	2.46694e+08	2.12407e+08	1.28016e+08	1.43081e+08	1.20176e+08	2.23045e+08	2.99972e+08	1.64788e+08	2.37309e+08	9.68693e+07	2.16508e+08	2.23645e+08	2.47332e+08	1.52308e+08	1.48953e+08	1.55287e+08	2.38212e+08	1.30204e+08	1.08956e+08
SPARCL1	Q14515	SPARC-like protein 1 OS=Homo sapiens OX=9606 GN=SPARCL1 PE=1 SV=2	20	5.36592e+06	5.57239e+06	3.31626e+06	3.63269e+06	7.09115e+06	6.2023e+06	7.89211e+06	3.01667e+06	6.55732e+06	5.50444e+06	6.52165e+06	3.92463e+06	3.18152e+06	4.73083e+06	8.41048e+06	5.72949e+06	5.24133e+06	6.39187e+06	5.84849e+06	4.78084e+06	4.63006e+06	6.77894e+06
C8A	P07357	Complement component C8 alpha chain OS=Homo sapiens OX=9606 GN=C8A PE=1 SV=2	17	2.68263e+08	3.09377e+08	2.60249e+08	2.51287e+08	2.69711e+08	3.14523e+08	3.5579e+08	2.46281e+08	2.43301e+08	2.67675e+08	2.61346e+08	2.12465e+08	3.40269e+08	3.46079e+08	2.77317e+08	2.56572e+08	3.3336e+08	2.37146e+08	3.88859e+08	2.89491e+08	3.38648e+08	2.86031e+08
APOD	P05090	Apolipoprotein D OS=Homo sapiens OX=9606 GN=APOD PE=1 SV=1	14	5.09308e+08	5.03043e+08	7.14056e+08	4.75206e+08	6.10559e+08	4.80065e+08	6.88727e+08	5.40082e+08	3.61164e+08	3.79872e+08	3.32551e+08	5.10797e+08	3.00188e+08	4.34786e+08	5.20909e+08	7.48041e+08	3.76574e+08	5.05152e+08	6.98424e+08	4.17345e+08	4.36646e+08	5.92361e+08
C7	P10643	Complement component C7 OS=Homo sapiens OX=9606 GN=C7 PE=1 SV=2	25	7.64601e+07	5.46686e+07	3.88355e+07	2.96944e+08	4.74923e+07	5.86273e+07	4.35634e+07	6.45283e+07	5.47006e+07	4.93311e+07	7.04103e+07	4.01679e+07	6.88384e+07	7.41301e+07	5.28996e+07	3.45397e+07	4.61055e+07	6.90348e+07	6.34854e+07	3.14358e+07	6.72606e+07	3.89558e+07
HPR	P00739	Haptoglobin-related protein OS=Homo sapiens OX=9606 GN=HPR PE=2 SV=2	4	2.864e+06	2.81384e+06	3.1147e+06	2.1245e+06	3.78503e+06	1.96873e+06	3.58992e+06	1.39251e+06	2.37504e+06	4.12483e+06	2.62111e+06	3.54364e+06	2.9267e+06	3.75067e+06	1.20095e+06	1.93504e+06	3.14379e+06	3.68508e+06	4.56999e+06	1.32326e+06	2.1585e+06	3.44446e+06
CFHR1	Q03591	Complement factor H-related protein 1 OS=Homo sapiens OX=9606 GN=CFHR1 PE=1 SV=2	3	2.34891e+07	2.61421e+07	2.99385e+07	1.80378e+07	3.24517e+07	2.00581e+07	2.93729e+07	2.1508e+07	2.53388e+07	1.79005e+07	2.42941e+07	1.59906e+07	4.35201e+07	2.54803e+07	1.69261e+07	1.38827e+07	2.61248e+07	1.96992e+07	1.99905e+07	4.61859e+07	2.77406e+07	2.18706e+07
AHSG	P02765	Alpha-2-HS-glycoprotein OS=Homo sapiens OX=9606 GN=AHSG PE=1 SV=2	8	3.96522e+07	7.08105e+07	2.57897e+07	8.62587e+07	3.00313e+07	2.07567e+07	2.78263e+07	9.59413e+06	4.57801e+07	5.73575e+07	3.72075e+07	5.59206e+07	3.45246e+08	3.05601e+07	4.66485e+07	5.92205e+07	1.39517e+07	3.7907e+07	5.76201e+07	3.59441e+07	3.01027e+07	5.09042e+07
GPLD1	P80108	Phosphatidylinositol-glycan-specific phospholipase D OS=Homo sapiens OX=9606 GN=GPLD1 PE=1 SV=3	19	7.63246e+08	7.30585e+08	7.25943e+08	7.2093e+08	6.8339e+08	9.36693e+08	7.45952e+08	7.85724e+08	8.81579e+08	9.26789e+08	7.82029e+08	4.43432e+08	5.25558e+08	1.0028e+09	1.00416e+09	8.36692e+08	6.77506e+08	7.14366e+08	7.45526e+08	5.87251e+08	5.7057e+08	6.41426e+08
FCN2	Q15485	Ficolin-2 OS=Homo sapiens OX=9606 GN=FCN2 PE=1 SV=2	7	5.59809e+07	3.9259e+07	1.18416e+08	4.17732e+07	9.61587e+07	7.69781e+07	1.97953e+07	6.47264e+07	2.43261e+07	5.82658e+07	3.46945e+07	2.46753e+07	1.06977e+08	3.08205e+07	1.2556e+07	2.41862e+07	6.05115e+07	3.26169e+07	4.21065e+07	2.20452e+07	3.1451e+07	2.93194e+07
KNG1	P01042	Kininogen-1 OS=Homo sapiens OX=9606 GN=KNG1 PE=1 SV=2	20	1.10379e+08	1.09155e+08	1.84871e+08	1.38922e+08	9.56789e+07	1.28448e+08	1.0725e+08	6.67315e+07	1.10259e+08	8.57492e+07	9.35089e+07	9.23697e+07	1.22353e+08	1.02956e+08	9.73446e+07	1.18887e+08	9.39325e+07	1.29085e+08	1.34128e+08	8.87091e+07	8.81669e+07	1.15991e+08
CFHR5	Q9BXR6	Complement factor H-related protein 5 OS=Homo sapiens OX=9606 GN=CFHR5 PE=1 SV=1	22	7.18748e+07	7.82433e+07	6.62782e+07	7.0092e+07	8.16856e+07	1.17747e+08	6.60868e+07	6.05644e+07	8.11867e+07	5.43802e+07	6.17829e+07	5.89441e+07	1.05515e+08	6.8471e+07	5.99958e+07	3.06506e+07	1.08815e+08	7.43571e+07	1.18437e+08	8.40427e+07	6.51462e+07	6.70024e+07
SOD3	P08294	Extracellular superoxide dismutase [Cu-Zn] OS=Homo sapiens OX=9606 GN=SOD3 PE=1 SV=2	11	2.11273e+07	1.29863e+07	1.66536e+07	1.135e+07	1.06051e+07	1.55911e+07	1.30161e+07	8.88624e+06	1.96659e+07	2.16951e+07	8.50741e+07	8.73615e+06	8.16212e+06	1.55328e+07	1.85355e+07	1.52085e+07	7.23303e+06	1.68663e+07	9.55855e+06	1.03866e+07	1.24449e+07	1.59349e+07
LUM	P51884	Lumican OS=Homo sapiens OX=9606 GN=LUM PE=1 SV=2	14	8.7761e+07	8.83211e+07	6.09877e+07	5.87428e+07	6.41924e+07	4.87273e+07	8.69119e+07	4.72424e+07	1.13563e+08	1.93198e+08	1.07555e+08	9.64906e+07	7.76937e+07	9.46716e+07	1.347e+08	9.36579e+07	6.2166e+07	1.00419e+08	6.33397e+07	4.18645e+07	9.82894e+07	1.16409e+08
CHGA	P10645	Chromogranin-A OS=Homo sapiens OX=9606 GN=CHGA PE=1 SV=7	19	5.00429e+06	6.16264e+06	3.63783e+06	3.91905e+06	1.03457e+07	5.81359e+06	5.53125e+06	2.17952e+06	4.71561e+06	4.11629e+06	3.00269e+06	6.78137e+06	5.52781e+06	4.2446e+06	6.16438e+06	6.00472e+06	6.40606e+06	6.22198e+06	1.18191e+07	2.71945e+06	9.2823e+06	3.23594e+06
C1QB	P02746	Complement C1q subcomponent subunit B OS=Homo sapiens OX=9606 GN=C1QB PE=1 SV=3	9	2.283e+09	2.57277e+09	2.36846e+09	2.16975e+09	2.56326e+09	2.2123e+09	2.52059e+09	2.64695e+09	2.06385e+09	2.17163e+09	1.97146e+09	2.14169e+09	3.53326e+09	2.01485e+09	3.3319e+09	2.85574e+09	2.1295e+09	2.12247e+09	2.1034e+09	2.76424e+09	2.62979e+09	2.2426e+09
IGFBP3	P17936	Insulin-like growth factor-binding protein 3 OS=Homo sapiens OX=9606 GN=IGFBP3 PE=1 SV=2	11	1.33335e+07	9.87728e+06	1.69773e+07	1.52999e+07	1.26644e+07	8.34759e+06	1.70531e+07	1.09848e+07	1.71499e+07	1.57625e+07	1.26865e+07	6.40931e+06	9.13776e+06	1.39271e+07	1.46465e+07	8.35979e+06	7.8775e+06	8.74533e+06	7.85914e+06	2.30767e+06	1.35309e+07	1.23811e+07
APCS	P02743	Serum amyloid P-component OS=Homo sapiens OX=9606 GN=APCS PE=1 SV=2	14	5.85217e+08	4.97025e+08	5.99784e+08	8.82502e+08	4.78606e+08	6.37791e+08	5.93625e+08	4.38832e+08	6.15328e+08	6.36439e+08	4.30304e+08	5.3896e+08	5.56182e+08	5.11857e+08	3.52682e+08	4.46687e+08	7.80388e+08	4.67032e+08	5.33885e+08	4.34831e+08	4.63783e+08	4.22928e+08
KRT1	P04264	Keratin, type II cytoskeletal 1 OS=Homo sapiens OX=9606 GN=KRT1 PE=1 SV=6	17	9.2575e+06	1.0353e+07	5.00488e+06	1.26844e+07	1.40863e+07	7.09675e+06	8.59412e+06	1.13553e+07	7.21272e+06	2.67786e+06	7.9322e+06	1.59305e+07	4.93918e+06	6.37825e+06	1.71909e+07	1.11388e+07	7.58057e+06	1.12402e+07	9.45787e+06	1.112e+07	8.62867e+06	1.58551e+07
C1R	P00736	Complement C1r subcomponent OS=Homo sapiens OX=9606 GN=C1R PE=1 SV=2	12	8.36678e+07	9.1055e+07	1.02688e+08	1.12991e+08	7.68783e+07	7.30595e+07	1.02744e+08	4.95966e+07	9.55707e+07	1.00846e+08	7.21362e+07	5.0169e+07	1.50448e+08	1.07695e+08	9.77748e+07	8.50431e+07	8.93107e+07	6.42884e+07	9.25779e+07	5.56893e+07	7.96263e+07	8.80976e+07
IGHG2	P01859	Immunoglobulin heavy constant gamma 2 OS=Homo sapiens OX=9606 GN=IGHG2 PE=1 SV=2	5	6.91572e+07	5.9558e+07	3.6005e+07	1.24067e+08	1.07751e+08	5.58088e+07	4.81079e+07	6.02063e+07	7.57861e+07	4.28638e+07	3.35776e+07	1.07399e+08	5.25663e+07	8.94163e+07	4.70499e+07	7.47442e+07	6.73178e+07	4.65703e+07	4.37298e+07	2.10177e+07	8.07393e+07	7.24285e+07
SERPINF2	P08697	Alpha-2-antiplasmin OS=Homo sapiens OX=9606 GN=SERPINF2 PE=1 SV=3	16	1.52671e+07	1.89463e+07	2.70835e+07	1.70627e+07	1.09645e+07	9.60654e+06	1.80769e+07	1.27772e+07	9.35553e+06	1.68023e+07	1.6951e+07	1.39907e+07	2.36436e+07	1.5235e+07	1.92653e+07	1.95041e+07	1.82064e+07	2.20554e+07	2.11283e+07	1.23359e+07	1.43995e+07	2.36892e+07
SERPINA10	Q9UK55	Protein Z-dependent protease inhibitor OS=Homo sapiens OX=9606 GN=SERPINA10 PE=1 SV=1	14	1.74165e+07	1.49834e+07	1.87602e+07	2.2379e+07	1.05401e+07	1.77233e+07	1.03112e+07	1.18143e+07	2.80708e+07	2.47314e+07	1.39722e+07	1.58626e+07	2.44568e+07	2.40873e+07	1.58701e+07	1.09296e+07	9.69128e+06	2.18513e+07	1.83494e+07	8.03578e+06	9.14337e+06	7.41912e+06
TF	P02787	Serotransferrin OS=Homo sapiens OX=9606 GN=TF PE=1 SV=3	18	1.03211e+07	9.56787e+06	7.69441e+06	2.1315e+07	7.65739e+06	7.58224e+06	6.29767e+06	4.53303e+06	1.1322e+07	1.83697e+07	1.19973e+07	6.44225e+06	5.20019e+06	1.30803e+07	1.29496e+07	8.8101e+06	1.08154e+07	1.68697e+07	5.14715e+06	3.70532e+06	1.16168e+07	7.48404e+06
HSPG2	P98160	Basement membrane-specific heparan sulfate proteoglycan core protein OS=Homo sapiens OX=9606 GN=HSPG2 PE=1 SV=4	18	8.82572e+06	1.06806e+07	1.14372e+07	5.94974e+06	1.04836e+07	7.29976e+06	1.23693e+07	4.93457e+06	1.04593e+07	9.65502e+06	6.95747e+06	8.71116e+06	7.44013e+06	8.18045e+06	1.1641e+07	1.31337e+07	8.94851e+06	1.17195e+07	9.04937e+06	1.13957e+07	1.12305e+07	1.40673e+07
SERPINF1	P36955	Pigment epithelium-derived factor OS=Homo sapiens OX=9606 GN=SERPINF1 PE=1 SV=4	17	4.47881e+07	4.3289e+07	5.55505e+07	4.52627e+07	5.65117e+07	3.31025e+07	4.82269e+07	3.51685e+07	6.41878e+07	4.21927e+07	4.24427e+07	2.52349e+07	2.7673e+07	5.4344e+07	7.51686e+07	7.59167e+07	3.06015e+07	3.66314e+07	3.51781e+07	2.75787e+07	3.53143e+07	3.44842e+07
IGLL5	B9A064	Immunoglobulin lambda-like polypeptide 5 OS=Homo sapiens OX=9606 GN=IGLL5 PE=2 SV=2	6	1.25606e+07	1.52121e+07	9.48336e+06	5.61025e+06	1.26334e+07	8.86047e+06	1.23235e+07	9.7076e+06	1.7115e+07	1.20987e+07	1.97213e+07	1.80529e+07	1.21221e+07	1.77954e+07	1.40082e+07	1.94553e+07	7.65635e+06	2.34095e+07	9.81943e+06	1.21967e+07	1.88236e+07	1.68341e+07
APOC3	P02656	Apolipoprotein C-III OS=Homo sapiens OX=9606 GN=APOC3 PE=1 SV=1	6	1.37486e+09	1.33779e+09	1.46629e+09	7.57899e+08	1.84196e+09	9.3274e+08	1.28712e+09	2.01623e+09	1.50168e+09	1.70544e+09	1.54912e+09	6.90164e+08	6.77077e+08	1.74788e+09	1.52599e+09	8.31587e+08	1.96377e+09	1.46672e+09	1.23417e+09	9.2524e+08	1.75219e+09	1.25326e+09
IGHA1	P01876	Immunoglobulin heavy constant alpha 1 OS=Homo sapiens OX=9606 GN=IGHA1 PE=1 SV=2	6	5.68671e+08	7.52782e+08	3.89993e+08	6.04426e+08	7.54053e+08	5.02605e+08	8.68608e+08	3.93511e+08	5.50879e+08	5.17395e+08	3.25938e+08	7.793e+08	2.48737e+08	7.34932e+08	1.14171e+09	7.36612e+08	2.37243e+08	2.25856e+09	4.23839e+08	4.32369e+08	9.1321e+08	4.00609e+08
ECM1	Q16610	Extracellular matrix protein 1 OS=Homo sapiens OX=9606 GN=ECM1 PE=1 SV=2	18	6.82919e+07	6.91596e+07	1.12521e+08	5.50089e+07	5.4335e+07	4.78993e+07	6.74538e+07	6.13558e+07	3.44894e+07	8.57766e+07	7.6125e+07	8.79538e+07	6.80256e+07	6.26649e+07	1.17565e+08	6.4864e+07	5.79049e+07	6.87729e+07	4.79789e+07	2.61787e+07	9.45383e+07	8.3103e+07
PF4	P02776	Platelet factor 4 OS=Homo sapiens OX=9606 GN=PF4 PE=1 SV=2	9	2.04166e+08	2.32173e+08	1.91886e+08	2.02853e+07	4.41727e+08	2.22964e+08	2.10768e+08	3.18708e+08	2.90961e+08	3.06513e+07	1.67311e+08	1.46401e+08	3.26245e+08	2.46814e+08	4.60958e+07	1.73026e+08	1.29385e+08	5.50196e+08	2.67603e+08	6.37139e+07	2.23008e+08	2.9564e+08
TNXB	P22105	Tenascin-X OS=Homo sapiens OX=9606 GN=TNXB PE=1 SV=5	25	9.50582e+06	9.67301e+06	8.25707e+06	8.37177e+06	9.36305e+06	8.36694e+06	8.03593e+06	6.94106e+06	1.05294e+07	1.85268e+07	7.23465e+06	9.43153e+06	6.20087e+06	9.81699e+06	1.0979e+07	1.46447e+07	1.0065e+07	8.59779e+06	7.8529e+06	7.38617e+06	9.54835e+06	1.16383e+07
GC	P02774	Vitamin D-binding protein OS=Homo sapiens OX=9606 GN=GC PE=1 SV=2	13	1.7865e+07	2.10116e+07	3.05848e+07	1.13995e+07	1.27483e+07	1.62425e+07	1.36535e+07	1.63593e+07	2.79435e+07	9.5917e+06	2.26477e+07	1.74791e+07	4.11037e+07	2.04661e+07	1.98598e+07	1.96388e+07	8.63307e+06	1.64039e+07	3.18144e+07	1.22844e+07	1.98498e+07	2.00618e+07
C4BPA	P04003	C4b-binding protein alpha chain OS=Homo sapiens OX=9606 GN=C4BPA PE=1 SV=2	16	6.3408e+08	6.24728e+08	6.66932e+08	5.44071e+08	7.82645e+08	6.77855e+08	6.76087e+08	6.2702e+08	7.68267e+08	4.30978e+08	3.97959e+08	7.68987e+08	6.30716e+08	6.84302e+08	4.00954e+08	6.05932e+08	9.14233e+08	5.24822e+08	7.19268e+08	5.69548e+08	5.99642e+08	5.97862e+08
C1QC	P02747	Complement C1q subcomponent subunit C OS=Homo sapiens OX=9606 GN=C1QC PE=1 SV=3	9	1.13112e+09	1.07089e+09	1.10312e+09	9.92391e+08	1.109e+09	9.71841e+08	1.01477e+09	1.11132e+09	1.35097e+09	1.43988e+09	1.00792e+09	1.21003e+09	1.20422e+09	1.07247e+09	1.35759e+09	1.23014e+09	9.43229e+08	1.17816e+09	1.00439e+09	6.70759e+08	1.19206e+09	8.55843e+08
TLN1	Q9Y490	Talin-1 OS=Homo sapiens OX=9606 GN=TLN1 PE=1 SV=3	19	2.08554e+06	3.00558e+06	2.03124e+06	1.75071e+06	2.7648e+06	2.20233e+06	323229	1.86206e+06	5.76341e+06	206359	1.40898e+06	2.54229e+06	2.54951e+06	2.905e+06	469938	4.31448e+06	1.99334e+06	5.02029e+06	6.08633e+06	1.46963e+06	2.18043e+06	3.06686e+06
FBLN1	P23142	Fibulin-1 OS=Homo sapiens OX=9606 GN=FBLN1 PE=1 SV=4	12	1.15097e+08	1.51994e+08	9.56619e+07	1.13717e+08	7.80677e+07	1.33932e+08	1.5416e+08	3.75026e+07	1.51906e+08	1.41949e+08	8.47727e+07	1.59305e+08	6.67304e+07	1.17834e+08	1.3672e+08	7.69273e+07	1.42668e+08	3.94134e+08	7.41355e+07	1.38452e+08	2.20122e+08	1.52217e+08
SELENOP	P49908	Selenoprotein P OS=Homo sapiens OX=9606 GN=SELENOP PE=1 SV=3	11	7.27785e+07	7.13514e+07	6.68592e+07	5.97937e+07	8.5954e+07	7.10547e+07	8.76768e+07	5.19345e+07	9.59211e+07	9.76761e+07	6.00483e+07	5.08661e+07	4.90801e+07	5.81029e+07	7.2964e+07	7.35222e+07	9.14062e+07	6.11174e+07	6.61606e+07	7.20992e+07	8.83724e+07	8.06891e+07
CPN1	P15169	Carboxypeptidase N catalytic chain OS=Homo sapiens OX=9606 GN=CPN1 PE=1 SV=1	14	2.0948e+07	2.20604e+07	1.95025e+07	3.44684e+07	2.16443e+07	2.11609e+07	2.41695e+07	1.08655e+07	1.90758e+07	2.69075e+07	1.83039e+07	1.33822e+07	1.93216e+07	3.39287e+07	2.18161e+07	3.7215e+07	1.93351e+07	2.71514e+07	1.57591e+07	1.33335e+07	1.20067e+07	2.0737e+07
FLNA	P21333	Filamin-A OS=Homo sapiens OX=9606 GN=FLNA PE=1 SV=4	16	2.60469e+06	3.74601e+06	3.8547e+06	1.94996e+06	1.99137e+06	3.77071e+06	1.10037e+06	2.75014e+06	5.18986e+06	472982	919587	4.04724e+06	4.04729e+06	2.80947e+06	2.87603e+06	5.01125e+06	2.31603e+06	4.3206e+06	5.78089e+06	2.68967e+06	3.13467e+06	4.47414e+06
C8B	P07358	Complement component C8 beta chain OS=Homo sapiens OX=9606 GN=C8B PE=1 SV=3	12	9.63975e+07	1.04549e+08	9.18159e+07	1.14192e+08	9.82789e+07	9.95474e+07	9.31155e+07	7.40353e+07	1.01124e+08	9.34389e+07	9.97214e+07	9.87063e+07	1.1011e+08	1.32972e+08	1.15534e+08	1.03885e+08	7.92116e+07	1.13014e+08	1.33827e+08	6.62592e+07	1.19042e+08	7.16368e+07
PROC	P04070	Vitamin K-dependent protein C OS=Homo sapiens OX=9606 GN=PROC PE=1 SV=1	11	7.76994e+07	8.23847e+07	1.06273e+08	3.93032e+07	1.35263e+08	3.71233e+07	6.65771e+07	4.74007e+07	8.26123e+07	9.9066e+07	1.08742e+08	5.46346e+07	5.74347e+07	7.66625e+07	6.14014e+07	9.43305e+07	1.04944e+08	7.93673e+07	7.43831e+07	1.12295e+08	8.08696e+07	8.21598e+07
CFHR2	P36980	Complement factor H-related protein 2 OS=Homo sapiens OX=9606 GN=CFHR2 PE=1 SV=1	8	5.29091e+06	3.40182e+06	5.33898e+06	4.85234e+06	1.18433e+07	2.0748e+06	4.897e+06	1.656e+06	1.196e+07	2.87464e+06	3.46409e+06	3.94794e+06	4.27623e+06	2.94408e+06	1.38278e+06	2.03905e+06	3.17922e+06	1.88148e+06	6.12274e+06	7.27021e+06	2.69805e+06	2.22435e+06
KLKB1	P03952	Plasma kallikrein OS=Homo sapiens OX=9606 GN=KLKB1 PE=1 SV=1	18	1.92367e+07	1.88661e+07	4.50842e+07	2.90403e+07	8.41813e+06	1.97516e+07	2.20054e+07	9.6427e+06	2.07953e+07	1.41544e+07	1.35152e+07	9.95999e+06	1.00458e+07	2.38662e+07	2.48687e+07	2.45155e+07	1.97074e+07	2.03981e+07	1.7856e+07	1.23079e+07	1.67762e+07	1.83195e+07
PZP	P20742	Pregnancy zone protein OS=Homo sapiens OX=9606 GN=PZP PE=1 SV=4	15	6.62551e+06	5.48162e+06	2.19096e+06	2.81408e+06	1.0575e+07	1.48064e+07	3.20332e+06	3.84373e+06	2.98853e+06	3.10473e+06	2.024e+07	2.4884e+06	5.37958e+06	1.30552e+06	928812	3.99709e+06	5.47579e+06	1.27893e+07	1.34275e+07	4.78765e+06	2.85311e+06	3.87186e+06
VCAM1	P19320	Vascular cell adhesion protein 1 OS=Homo sapiens OX=9606 GN=VCAM1 PE=1 SV=1	18	6.17701e+06	9.65362e+06	7.80919e+06	5.63763e+06	5.12618e+06	2.60808e+06	7.88622e+06	3.34067e+06	6.43583e+06	1.00791e+07	7.43943e+06	5.40776e+06	1.00159e+07	9.70029e+06	1.26505e+07	1.43921e+07	5.28112e+06	1.33858e+07	5.79615e+06	9.6259e+06	8.51252e+06	7.17597e+06
SERPING1	P05155	Plasma protease C1 inhibitor OS=Homo sapiens OX=9606 GN=SERPING1 PE=1 SV=2	11	2.78504e+07	2.4902e+07	4.43709e+07	2.75078e+07	2.44903e+07	1.56664e+07	2.96997e+07	2.10863e+07	1.7357e+07	4.50503e+07	2.4838e+07	2.84373e+07	1.85772e+07	3.20476e+07	2.86665e+07	2.75359e+07	2.55875e+07	3.25385e+07	1.88712e+07	1.99605e+07	2.43183e+07	2.0917e+07
CPB2	Q96IY4	Carboxypeptidase B2 OS=Homo sapiens OX=9606 GN=CPB2 PE=1 SV=2	8	2.38762e+07	2.35696e+07	2.89947e+07	2.44566e+07	2.53694e+07	1.96523e+07	2.32619e+07	2.2239e+07	2.88436e+07	2.79253e+07	1.96437e+07	1.83753e+07	2.44475e+07	2.29433e+07	2.24723e+07	2.20346e+07	2.30431e+07	1.81886e+07	2.52173e+07	2.45767e+07	2.30548e+07	2.97176e+07
HABP2	Q14520	Hyaluronan-binding protein 2 OS=Homo sapiens OX=9606 GN=HABP2 PE=1 SV=1	14	1.28659e+07	1.18072e+07	1.40803e+07	1.59867e+07	1.82341e+07	7.19476e+06	4.61228e+06	1.55839e+07	1.17533e+07	1.72765e+07	1.53595e+07	8.57803e+06	1.08419e+07	1.5196e+07	7.24588e+06	4.81609e+06	1.34326e+07	1.56271e+07	1.08633e+07	1.42388e+07	1.43608e+07	1.14495e+07
LGALS3BP	Q08380	Galectin-3-binding protein OS=Homo sapiens OX=9606 GN=LGALS3BP PE=1 SV=1	12	3.28133e+07	3.15367e+07	1.54697e+07	1.78558e+07	1.72655e+07	1.31095e+07	3.82502e+07	3.80218e+07	4.72195e+07	9.1241e+07	3.41091e+07	1.55914e+07	3.71808e+07	2.48542e+07	2.51203e+07	1.33036e+07	4.43238e+07	3.16583e+07	3.16405e+07	3.66898e+07	5.06593e+07	1.99367e+07
IGHA2	P01877	Immunoglobulin heavy constant alpha 2 OS=Homo sapiens OX=9606 GN=IGHA2 PE=1 SV=4	3	1.20561e+07	1.32971e+07	4.15319e+06	8.03253e+06	1.27193e+07	3.66711e+06	7.46769e+06	8.99982e+06	4.85471e+06	1.13835e+07	5.99729e+06	5.32862e+07	2.671e+06	3.61114e+07	2.22192e+07	8.76497e+06	8.0146e+06	1.8548e+07	1.03157e+07	5.5857e+06	9.47017e+06	1.12706e+07
VCL	P18206	Vinculin OS=Homo sapiens OX=9606 GN=VCL PE=1 SV=4	15	4.04677e+06	5.7342e+06	5.5807e+06	3.37192e+06	4.53128e+06	3.06778e+06	6.4241e+06	1.64084e+06	5.10838e+06	4.22138e+06	3.7888e+06	2.73251e+06	1.32293e+07	4.75226e+06	3.49033e+06	7.658e+06	3.04241e+06	6.53847e+06	3.59946e+06	4.30065e+06	4.0715e+06	6.65968e+06
LTF	P02788	Lactotransferrin OS=Homo sapiens OX=9606 GN=LTF PE=1 SV=6	14	3.56271e+06	4.20089e+06	3.09551e+06	1.29424e+06	3.4127e+06	4.94103e+06	1.03863e+06	4.47958e+06	3.72799e+06	4.05677e+06	5.35403e+06	4.22666e+06	1.00338e+07	1.09819e+07	1.57563e+06	3.60761e+06	1.36165e+06	7.08481e+06	2.22253e+06	1.09e+06	2.85131e+06	1.19961e+06
RBP4	P02753	Retinol-binding protein 4 OS=Homo sapiens OX=9606 GN=RBP4 PE=1 SV=3	10	1.17866e+08	1.25405e+08	1.27242e+08	1.826e+08	1.01055e+08	1.39611e+08	1.15684e+08	6.6366e+07	1.18933e+08	1.19575e+08	7.82843e+07	1.29309e+08	1.39562e+08	1.31441e+08	1.44201e+08	1.76789e+08	9.23958e+07	1.14141e+08	1.31511e+08	1.06671e+08	1.18057e+08	9.92782e+07
SERPIND1	P05546	Heparin cofactor 2 OS=Homo sapiens OX=9606 GN=SERPIND1 PE=1 SV=3	15	1.04395e+08	1.02206e+08	1.50988e+08	8.01813e+07	1.18319e+08	1.08138e+08	1.179e+08	8.42006e+07	8.61507e+07	7.7992e+07	1.09798e+08	1.10277e+08	5.88538e+07	1.01236e+08	1.08005e+08	1.45699e+08	1.02188e+08	9.16541e+07	1.10339e+08	8.66936e+07	9.42811e+07	1.23108e+08
SPARC	P09486	SPARC OS=Homo sapiens OX=9606 GN=SPARC PE=1 SV=1	6	3.56913e+07	3.88259e+07	4.25937e+07	5.43799e+06	6.30956e+07	3.48931e+07	2.73802e+07	4.79251e+07	5.85179e+07	1.25855e+07	2.717e+07	3.73139e+07	5.5332e+07	3.688e+07	1.30827e+07	4.26474e+07	3.08414e+07	6.31227e+07	4.25439e+07	2.83462e+07	3.0614e+07	4.48492e+07
LTBP1	Q14766	Latent-transforming growth factor beta-binding protein 1 OS=Homo sapiens OX=9606 GN=LTBP1 PE=1 SV=4	10	1.57544e+08	1.7581e+08	1.63984e+08	1.43078e+08	1.69488e+08	1.09416e+08	1.55996e+08	1.70549e+08	1.99207e+08	2.30552e+08	1.26796e+08	1.06379e+08	2.21778e+08	1.84692e+08	1.59716e+08	1.55736e+08	1.54754e+08	1.85217e+08	2.36211e+08	1.31699e+08	1.92754e+08	1.35543e+08
TNC	P24821	Tenascin OS=Homo sapiens OX=9606 GN=TNC PE=1 SV=3	11	1.64412e+06	2.52358e+06	1.52403e+06	1.21941e+06	2.10116e+06	1.53895e+06	2.76989e+06	409812	1.72149e+06	1.79688e+06	938458	2.42113e+06	2.96454e+06	2.28642e+06	3.26361e+06	2.93436e+06	2.82572e+06	3.39467e+06	984947	1.52606e+06	3.19982e+06	1.85568e+06
APOC2	P02655	Apolipoprotein C-II OS=Homo sapiens OX=9606 GN=APOC2 PE=1 SV=1	8	5.58245e+08	7.19782e+08	4.1943e+08	3.97811e+08	8.07454e+08	4.41918e+08	4.28998e+08	5.84912e+08	4.21088e+08	8.57989e+08	6.76956e+08	5.45894e+08	6.04625e+08	8.30781e+08	9.23354e+08	3.39674e+08	1.33189e+09	1.29131e+09	4.99864e+08	3.93302e+08	6.35927e+08	3.47095e+08
NUCB1	Q02818	Nucleobindin-1 OS=Homo sapiens OX=9606 GN=NUCB1 PE=1 SV=4	11	9.99268e+06	1.32425e+07	7.99122e+06	6.44096e+06	1.26108e+07	1.07054e+07	1.24603e+07	9.94874e+06	1.26532e+07	8.96864e+06	8.48668e+06	9.66092e+06	1.8254e+07	1.09086e+07	1.01732e+07	1.38001e+07	1.23902e+07	1.37778e+07	1.07931e+07	9.50184e+06	1.65948e+07	1.62318e+07
JCHAIN	P01591	Immunoglobulin J chain OS=Homo sapiens OX=9606 GN=JCHAIN PE=1 SV=4	9	8.09894e+07	1.03547e+08	1.43518e+08	4.55808e+07	1.083e+08	4.49614e+07	1.17965e+08	5.90188e+07	6.04789e+07	7.96595e+07	3.03766e+07	1.20035e+08	3.11108e+07	1.34385e+08	1.72531e+08	1.23529e+08	7.73601e+07	1.52152e+08	4.19796e+07	5.18907e+07	1.18682e+08	1.31847e+08
GOLM1	Q8NBJ4	Golgi membrane protein 1 OS=Homo sapiens OX=9606 GN=GOLM1 PE=1 SV=1	9	1.84632e+06	5.87793e+06	1.27138e+06	439788	1.08674e+06	1.3059e+06	1.13299e+06	681146	2.92309e+06	7.351e+06	1.06876e+06	1.20239e+06	9.01992e+06	2.87493e+07	4.65629e+06	2.37912e+06	1.7114e+06	3.81938e+06	1.15971e+06	3.47194e+06	2.36657e+06	1.44568e+06
MASP2	O00187	Mannan-binding lectin serine protease 2 OS=Homo sapiens OX=9606 GN=MASP2 PE=1 SV=4	9	1.54295e+07	1.56309e+07	1.85924e+07	1.35629e+07	2.10113e+07	1.24437e+07	1.26838e+07	1.71593e+07	5.71763e+06	1.65451e+07	1.69679e+07	1.96115e+07	1.77269e+07	1.99053e+07	4.4244e+06	1.25249e+07	2.01962e+07	1.70344e+07	1.58646e+07	2.47656e+07	1.48962e+07	8.97032e+06
ADAMTS13	Q76LX8	A disintegrin and metalloproteinase with thrombospondin motifs 13 OS=Homo sapiens OX=9606 GN=ADAMTS13 PE=1 SV=1	14	9.62866e+06	9.45881e+06	1.61875e+07	5.96319e+06	9.73382e+06	8.07065e+06	1.01664e+07	7.90572e+06	9.90649e+06	1.22198e+07	1.06943e+07	5.43868e+06	8.41797e+06	1.17011e+07	1.31781e+07	1.0404e+07	7.56951e+06	9.16093e+06	7.47318e+06	5.13424e+06	9.22019e+06	1.23288e+07
FETUB	Q9UGM5	Fetuin-B OS=Homo sapiens OX=9606 GN=FETUB PE=1 SV=2	9	7.4836e+06	6.62145e+06	6.63754e+06	9.07696e+06	7.98685e+06	3.59161e+06	7.66986e+06	9.37921e+06	8.55182e+06	8.69668e+06	9.26947e+06	3.97605e+06	7.59136e+06	5.94893e+06	5.76353e+06	7.26078e+06	5.62881e+06	7.59833e+06	4.90285e+06	7.27083e+06	8.10766e+06	6.14137e+06
C8G	P07360	Complement component C8 gamma chain OS=Homo sapiens OX=9606 GN=C8G PE=1 SV=3	7	5.55212e+07	6.04611e+07	5.34699e+07	5.98542e+07	6.26445e+07	4.57187e+07	5.77141e+07	6.88384e+07	5.37636e+07	5.88082e+07	5.13592e+07	4.30415e+07	8.89105e+07	5.40752e+07	5.05693e+07	6.60026e+07	4.82192e+07	4.53307e+07	7.18984e+07	6.15929e+07	6.62084e+07	5.18041e+07
APOH	P02749	Beta-2-glycoprotein 1 OS=Homo sapiens OX=9606 GN=APOH PE=1 SV=3	11	1.22571e+08	1.20973e+08	1.28906e+08	1.78406e+08	1.16173e+08	1.5527e+08	1.39082e+08	6.51153e+07	1.14544e+08	1.39634e+08	9.71777e+07	9.14053e+07	1.19793e+08	1.14232e+08	8.82397e+07	1.39647e+08	4.64116e+07	1.723e+08	1.58155e+08	1.26126e+08	1.45535e+08	9.92906e+07
MASP1	P48740	Mannan-binding lectin serine protease 1 OS=Homo sapiens OX=9606 GN=MASP1 PE=1 SV=3	8	8.36789e+06	7.30203e+06	1.1665e+07	1.01506e+07	1.15121e+07	5.58495e+06	6.34216e+06	7.33448e+06	3.037e+06	6.4214e+06	7.71742e+06	1.39137e+07	9.30521e+06	8.93993e+06	2.04412e+06	4.01057e+06	9.99919e+06	8.32525e+06	7.10564e+06	7.03872e+06	9.01198e+06	7.23968e+06
IGHV3-15	A0A0B4J1V0	Immunoglobulin heavy variable 3-15 OS=Homo sapiens OX=9606 GN=IGHV3-15 PE=3 SV=1	4	1.04717e+07	8.88264e+06	6.1829e+06	8.73875e+06	1.24807e+07	9.1708e+06	1.17478e+07	8.11921e+06	1.40167e+07	4.97289e+06	1.63215e+07	1.29656e+07	3.14516e+06	8.53177e+06	1.07761e+07	1.15994e+07	6.63866e+06	1.14071e+07	5.09567e+06	4.50475e+06	1.09173e+07	1.62104e+07
SERPINA5	P05154	Plasma serine protease inhibitor OS=Homo sapiens OX=9606 GN=SERPINA5 PE=1 SV=3	12	1.94809e+07	1.56178e+07	2.7441e+07	9.56276e+06	3.23523e+07	1.47472e+07	1.98027e+07	2.1538e+07	1.82994e+07	1.26517e+07	2.39099e+07	1.45038e+07	5.47263e+06	2.65975e+07	1.80921e+07	1.61677e+07	2.12805e+07	1.79862e+07	1.86495e+07	6.08965e+06	1.25774e+07	1.32644e+07
APOC4	P55056	Apolipoprotein C-IV OS=Homo sapiens OX=9606 GN=APOC4 PE=1 SV=1	7	4.20742e+07	3.46561e+07	2.74097e+07	2.18725e+07	6.29918e+07	1.01787e+07	1.96872e+07	8.55329e+07	5.32661e+07	6.5297e+07	5.10557e+07	2.345e+07	2.84228e+07	3.74955e+07	1.69683e+07	2.14406e+07	8.79639e+07	3.61833e+07	2.47549e+07	2.40767e+07	4.40435e+07	2.52118e+07
H2BC18	Q5QNW6	Histone H2B type 2-F OS=Homo sapiens OX=9606 GN=H2BC18 PE=1 SV=3	8	1.90352e+06	4.82133e+06	1.89952e+06	2.20246e+06	2.84788e+06	1.7278e+06	1.45809e+06	1.40178e+06	2.41449e+06	1.46807e+06	1.77058e+06	1.84456e+06	3.20797e+07	2.35994e+06	1.32477e+06	1.1885e+06	2.53229e+06	2.39707e+06	1.06886e+06	2.07006e+06	2.05839e+06	1.13364e+06
FCGBP	Q9Y6R7	IgGFc-binding protein OS=Homo sapiens OX=9606 GN=FCGBP PE=1 SV=3	14	3.28257e+06	4.38521e+06	2.8322e+06	3.62655e+06	2.34503e+06	2.57065e+06	4.26658e+06	412487	3.29491e+06	7.74781e+06	2.67791e+06	3.05159e+06	8.24177e+06	4.10912e+06	5.41599e+06	6.80211e+06	3.48788e+06	2.29032e+06	2.36523e+06	1.28682e+06	7.01872e+06	2.83409e+06
F12	P00748	Coagulation factor XII OS=Homo sapiens OX=9606 GN=F12 PE=1 SV=3	15	5.73118e+07	4.77337e+07	8.72229e+07	3.95577e+07	3.02116e+07	7.82915e+07	8.0999e+07	3.46603e+07	6.98892e+07	5.97621e+07	6.67096e+07	2.58143e+07	3.34847e+07	5.67777e+07	5.61134e+07	5.73884e+07	3.04925e+07	4.92162e+07	4.2382e+07	6.17238e+07	3.49729e+07	5.47861e+07
PRG4	Q92954	Proteoglycan 4 OS=Homo sapiens OX=9606 GN=PRG4 PE=1 SV=3	7	2.19217e+07	2.1924e+07	2.57523e+07	1.71585e+07	2.43803e+07	6.1949e+06	2.68252e+07	2.67228e+07	1.52212e+07	1.53052e+07	4.56419e+07	1.60144e+07	1.3093e+07	1.34519e+07	1.20019e+07	1.58037e+07	2.18859e+07	1.20523e+07	2.65659e+07	3.91347e+07	2.23365e+07	4.29144e+07
IGKV2-40	A0A087WW87	Immunoglobulin kappa variable 2-40 OS=Homo sapiens OX=9606 GN=IGKV2-40 PE=3 SV=2	2	4.02282e+06	3.31205e+06	1.86137e+06	4.24002e+06	3.07006e+06	3.29132e+06	1.47768e+06	1.29849e+06	2.05441e+06	3.77691e+06	1.69544e+07	2.20355e+06	1.91132e+06	3.39722e+06	3.96853e+06	3.85015e+06	1.84354e+06	6.63628e+06	2.21609e+06	2.43076e+06	1.61161e+06	5.25502e+06
MST1	P26927	Hepatocyte growth factor-like protein OS=Homo sapiens OX=9606 GN=MST1 PE=1 SV=2	11	1.42597e+07	1.16095e+07	1.92577e+07	1.96169e+07	1.26938e+07	1.22197e+07	1.41565e+07	1.28199e+07	1.10171e+07	1.93918e+07	1.1659e+07	9.76464e+06	7.94821e+06	1.453e+07	9.35732e+06	1.18065e+07	1.33043e+07	2.0252e+07	1.10029e+07	6.67899e+06	1.27427e+07	8.47152e+06
KRT10	P13645	Keratin, type I cytoskeletal 10 OS=Homo sapiens OX=9606 GN=KRT10 PE=1 SV=6	9	1.18847e+07	1.13639e+07	8.49255e+06	1.76559e+07	1.26257e+07	1.47147e+07	9.28768e+06	1.01573e+07	1.23779e+07	9.02982e+06	1.0512e+07	1.39936e+07	1.14986e+07	1.45822e+07	8.55221e+06	8.12441e+06	1.12769e+07	1.14773e+07	1.81753e+07	6.19372e+06	9.06709e+06	1.46917e+07
PON1	P27169	Serum paraoxonase/arylesterase 1 OS=Homo sapiens OX=9606 GN=PON1 PE=1 SV=3	8	4.62247e+07	3.36375e+07	4.50683e+07	5.35911e+07	5.28603e+07	2.79876e+07	3.52575e+07	3.05353e+07	4.99041e+07	6.18137e+07	4.08996e+07	6.43296e+07	3.04633e+07	3.3441e+07	2.60911e+07	4.45124e+07	2.94631e+07	3.39601e+07	4.37456e+07	1.77711e+07	4.08623e+07	3.60653e+07
MMRN1	Q13201	Multimerin-1 OS=Homo sapiens OX=9606 GN=MMRN1 PE=1 SV=3	13	4.47477e+06	3.20342e+06	5.51384e+06	3.56083e+06	3.87279e+06	1.20568e+06	3.3412e+06	6.2581e+06	5.0372e+06	281312	9.81077e+06	5.866e+06	5.27563e+06	2.58799e+06	531330	2.57417e+06	3.92274e+06	5.39771e+06	1.4817e+06	1.16887e+06	4.71719e+06	4.37682e+06
IGKV2-30	P06310	Immunoglobulin kappa variable 2-30 OS=Homo sapiens OX=9606 GN=IGKV2-30 PE=3 SV=2	5	1.05524e+07	1.13571e+07	1.18974e+07	1.04122e+07	7.45221e+06	9.52293e+06	8.16283e+06	1.50424e+07	8.50167e+06	7.65095e+06	1.56053e+07	1.12757e+07	7.30418e+06	1.37787e+07	1.95096e+07	8.70289e+06	5.69525e+06	1.94685e+07	8.75551e+06	7.061e+06	7.48665e+06	1.58082e+07
KRT2	P35908	Keratin, type II cytoskeletal 2 epidermal OS=Homo sapiens OX=9606 GN=KRT2 PE=1 SV=2	7	1.98275e+06	1.55758e+06	828982	2.99891e+06	2.63569e+06	2.26933e+06	398654	1.4778e+06	1.39e+06	117256	2.33955e+06	5.37136e+06	1.16261e+06	695421	3.07856e+06	3.17256e+06	1.57335e+06	781522	788753	1.61442e+06	1.12922e+06	1.57934e+06
KRT9	P35527	Keratin, type I cytoskeletal 9 OS=Homo sapiens OX=9606 GN=KRT9 PE=1 SV=3	7	1.33706e+07	1.45976e+07	1.67809e+07	1.39235e+07	1.62387e+07	8.86066e+06	1.49148e+07	1.04234e+07	1.0668e+07	1.23598e+07	1.93078e+07	1.02287e+07	6.22937e+06	1.86649e+07	1.05419e+07	1.18429e+07	1.56033e+07	1.5794e+07	2.59537e+07	1.61337e+07	1.11083e+07	1.41043e+07
FCN3	O75636	Ficolin-3 OS=Homo sapiens OX=9606 GN=FCN3 PE=1 SV=2	8	1.23368e+07	1.14559e+07	1.90095e+07	8.58283e+06	1.81853e+07	3.73205e+06	1.04209e+07	1.76793e+07	2.18958e+06	1.00993e+07	1.64151e+07	1.70544e+07	1.18515e+07	1.41956e+07	1.59364e+06	9.73287e+06	8.56885e+06	1.03741e+07	1.65043e+07	1.03463e+07	1.62018e+07	1.51899e+07
F13A1	P00488	Coagulation factor XIII A chain OS=Homo sapiens OX=9606 GN=F13A1 PE=1 SV=4	10	9.64774e+06	6.82108e+06	8.0273e+06	3.57016e+07	7.87571e+06	7.0589e+06	9.90561e+06	5.76511e+06	5.01546e+06	5560721	2.62094e+06	8.94607e+06	1.90212e+06	8.36157e+06	6.94306e+06	7.34725e+06	8.45667e+06	8.49732e+06	5.41666e+06	5.89298e+06	6.30986e+06	9.08328e+06
PCOLCE	Q15113	Procollagen C-endopeptidase enhancer 1 OS=Homo sapiens OX=9606 GN=PCOLCE PE=1 SV=2	8	1.28415e+06	1.47394e+06	845300	795052	2.06536e+06	1.55646e+06	1.34567e+06	384341	2.86968e+06	679127	1.33454e+06	966003	450967	1.72824e+06	2.86145e+06	1.2943e+06	850576	2.49327e+06	1.42175e+06	1.36185e+06	1.65263e+06	624309
LCAT	P04180	Phosphatidylcholine-sterol acyltransferase OS=Homo sapiens OX=9606 GN=LCAT PE=1 SV=1	8	1.42052e+07	1.16197e+07	1.21973e+07	2.12448e+07	6.84437e+06	1.50166e+07	7.69768e+06	2.33093e+07	6.67488e+06	9.38369e+06	2.07043e+07	1.89793e+07	8.94514e+06	8.11488e+06	7.85898e+06	4.89948e+06	2.61431e+07	6.86239e+06	2.14361e+07	1.33913e+07	7.82897e+06	1.0717e+07
SERPINA4	P29622	Kallistatin OS=Homo sapiens OX=9606 GN=SERPINA4 PE=1 SV=3	7	3.94306e+06	3.41837e+06	4.84339e+06	6.35695e+06	3.7579e+06	2.6031e+06	3.57364e+06	1.66204e+06	3.14775e+06	6.63376e+06	4.72161e+06	2.13049e+06	730128	5.05469e+06	3.54676e+06	3.91172e+06	2.08808e+06	5.62438e+06	3.83873e+06	3.94292e+06	2.5318e+06	2.91449e+06
CPN2	P22792	Carboxypeptidase N subunit 2 OS=Homo sapiens OX=9606 GN=CPN2 PE=1 SV=3	9	3.27409e+07	2.98567e+07	2.5129e+07	3.86604e+07	3.87375e+07	2.66344e+07	3.86775e+07	2.73433e+07	2.82676e+07	4.7446e+07	2.63324e+07	3.01804e+07	2.20327e+07	3.97972e+07	3.76592e+07	3.28448e+07	4.08857e+07	3.077e+07	2.3435e+07	2.50829e+07	1.67489e+07	2.931e+07
APOA5	Q6Q788	Apolipoprotein A-V OS=Homo sapiens OX=9606 GN=APOA5 PE=1 SV=1	9	1.46428e+07	9.50438e+06	2.52571e+07	2.08708e+07	8.27136e+06	9.58434e+06	1.0039e+07	3.24465e+07	9.19746e+06	7.09895e+06	1.13702e+07	1.2292e+07	2.76512e+06	1.15135e+07	2.90068e+06	1.18096e+07	1.30355e+07	1.01181e+07	1.92503e+07	7.65173e+06	1.08232e+07	5.17593e+06
IGHV3-7	P01780	Immunoglobulin heavy variable 3-7 OS=Homo sapiens OX=9606 GN=IGHV3-7 PE=1 SV=2	3	5.52067e+06	5.26562e+06	5.41694e+06	4.19099e+06	3.98328e+06	4.90677e+06	5.01916e+06	3.9113e+06	5.47945e+06	2.70851e+06	6.35726e+06	1.3233e+07	1.65786e+06	4.48153e+06	7.0432e+06	1.07073e+07	3.54409e+06	1.11571e+07	1.42992e+06	2.90327e+06	4.0094e+06	5.72243e+06
IGHV3-74	A0A0B4J1X5	Immunoglobulin heavy variable 3-74 OS=Homo sapiens OX=9606 GN=IGHV3-74 PE=3 SV=1	3	859567	1.60163e+06	958695	691959	671308	642605	938415	1.03802e+06	1.20674e+06	538058	827973	1.08189e+06	473964	2.44175e+06	2.56151e+06	808570	533882	1.02546e+06	446611	1.27048e+06	4.13683e+06	2.31725e+06
PCSK9	Q8NBP7	Proprotein convertase subtilisin/kexin type 9 OS=Homo sapiens OX=9606 GN=PCSK9 PE=1 SV=3	8	8.16261e+06	5.65895e+06	1.41968e+07	5.48314e+06	5.27902e+06	7.74364e+06	1.50263e+07	1.52858e+06	2.8504e+06	2.28901e+06	1.12537e+07	1.59755e+07	3.58555e+06	1.02627e+07	4.2879e+06	2.98924e+06	1.09662e+07	3.83537e+06	3.22337e+06	6.60992e+06	5.93125e+06	4.89802e+06
HBA1	P69905	Hemoglobin subunit alpha OS=Homo sapiens OX=9606 GN=HBA1 PE=1 SV=2	6	8.69244e+06	7.22935e+06	6.50173e+06	3.45638e+06	1.73923e+07	6.37861e+06	2.0396e+07	4.37358e+06	1.46838e+07	5.08362e+06	3.1107e+06	5.54762e+06	2.0381e+07	3.79059e+06	5.55031e+06	7.58863e+06	2.1586e+06	2.52539e+06	2.42615e+06	7.60067e+06	1.78955e+07	2.37661e+06
PSMA1	P25786	Proteasome subunit alpha type-1 OS=Homo sapiens OX=9606 GN=PSMA1 PE=1 SV=1	6	1.94464e+06	2.15644e+06	1.06545e+06	694962	2.001e+06	663897	1.7709e+06	288770	6.72943e+06	1.28534e+06	3.81037e+06	1.13629e+06	8.56638e+06	1.78062e+06	1.17237e+06	599274	1.06881e+06	710526	1.37606e+06	752026	2.14876e+06	3.38957e+06
HGFAC	Q04756	Hepatocyte growth factor activator OS=Homo sapiens OX=9606 GN=HGFAC PE=1 SV=1	5	8.43962e+06	8.56499e+06	8.39289e+06	7.63831e+06	7.13568e+06	5.19813e+06	7.56832e+06	4.33286e+06	9.33009e+06	1.27454e+07	1.44512e+07	7.60332e+06	1.22549e+06	1.03321e+07	1.51429e+07	1.31541e+07	1.22338e+07	1.27226e+07	2.45426e+06	3.7787e+06	8.54746e+06	6.0585e+06
ANGPTL6	Q8NI99	Angiopoietin-related protein 6 OS=Homo sapiens OX=9606 GN=ANGPTL6 PE=1 SV=1	9	3.49397e+06	3.94218e+06	7.63499e+06	3.789e+06	3.72119e+06	2.08409e+06	3.13264e+06	1.85888e+06	1.48547e+06	4.3502e+06	5.34172e+06	1.54151e+06	3.38404e+06	2.82281e+06	8.05593e+06	4.56038e+06	2.68087e+06	4.23834e+06	2.4979e+06	806873	3.82897e+06	6.54571e+06
PPBP	P02775	Platelet basic protein OS=Homo sapiens OX=9606 GN=PPBP PE=1 SV=3	6	7.96371e+06	1.20683e+07	8.95313e+06	1.87432e+06	1.56776e+07	9.44263e+06	8.38617e+06	8.82133e+06	1.09778e+07	4.3085e+06	6.35432e+06	4.84123e+06	2.9431e+07	1.14234e+07	5.76806e+06	9.17906e+06	5.70825e+06	2.62767e+07	1.459e+07	6.55386e+06	4.83323e+06	6.91956e+06
CFP	P27918	Properdin OS=Homo sapiens OX=9606 GN=CFP PE=1 SV=2	8	2.7461e+07	2.42095e+07	2.61217e+07	1.89055e+07	4.19001e+07	1.0884e+07	2.75183e+07	5.47296e+07	3.95963e+07	1.71236e+07	2.44157e+07	1.3415e+07	2.34938e+07	1.19168e+07	1.88364e+07	1.68334e+07	3.65385e+07	9.77824e+06	3.58134e+07	3.34381e+07	1.83988e+07	3.7047e+07
TUBA1A	Q71U36	Tubulin alpha-1A chain OS=Homo sapiens OX=9606 GN=TUBA1A PE=1 SV=1	6	5.21773e+06	6.00791e+06	100592	9.95096e+06	1.45401e+06	1.17673e+07	3.33144e+06	8.35325e+06	4.76868e+06	2.86642e+06	4.65024e+06	4.93437e+06	4.84245e+06	661362	3.83321e+06	2.62741e+06	3.58442e+06	2.62086e+07	3.3454e+06	1.84515e+06	6.43562e+06	6.69542e+06
GPX3	P22352	Glutathione peroxidase 3 OS=Homo sapiens OX=9606 GN=GPX3 PE=1 SV=2	9	1.36115e+07	1.29143e+07	1.24031e+07	1.8359e+07	1.30136e+07	1.27657e+07	1.15691e+07	1.00164e+07	1.07097e+07	1.939e+07	9.35573e+06	1.8533e+07	9.75794e+06	1.41475e+07	1.27466e+07	1.26513e+07	1.17608e+07	2.16714e+07	1.64064e+07	1.01633e+07	9.96932e+06	9.86846e+06
YWHAZ	P63104	14-3-3 protein zeta/delta OS=Homo sapiens OX=9606 GN=YWHAZ PE=1 SV=1	6	1.33328e+07	1.65013e+07	1.20297e+07	1.28147e+07	1.18645e+07	1.94628e+07	1.1029e+07	6.35781e+06	2.15468e+07	9.29731e+06	9.58478e+06	1.93404e+07	4.01467e+07	1.34082e+07	1.27067e+07	1.19729e+07	1.06812e+07	2.19999e+07	9.86796e+06	1.1735e+07	1.72027e+07	1.52915e+07
ANG	P03950	Angiogenin OS=Homo sapiens OX=9606 GN=ANG PE=1 SV=1	4	2.79227e+06	2.57985e+06	1.73401e+06	6.57898e+06	2.31338e+06	2.14699e+06	2.13811e+06	2.32788e+06	3.20963e+06	2.60032e+06	2.66865e+06	2.20477e+06	3.54171e+06	3.29621e+06	2.20645e+06	1.53121e+06	2.67059e+06	3.02102e+06	1.9869e+06	2.70268e+06	3.22899e+06	1.61278e+06
CFI	P05156	Complement factor I OS=Homo sapiens OX=9606 GN=CFI PE=1 SV=2	7	1.91061e+06	2.96121e+06	482992	4.57513e+06	2.88379e+06	594229	1.45905e+06	1.99218e+06	765325	1.91763e+06	3.75592e+06	679839	5.60948e+06	2.51232e+06	495811	328024	2.78606e+06	2.12187e+06	5.60604e+06	2.86762e+06	2.74565e+06	4.53917e+06
LPA	P08519	Apolipoprotein(a) OS=Homo sapiens OX=9606 GN=LPA PE=1 SV=1	10	1.38824e+07	6.61013e+06	1.21211e+06	5.82532e+07	4.25609e+06	1.8928e+07	7.36859e+06	2.48488e+06	1.4142e+07	1.87542e+06	1.41093e+07	1.61942e+07	9.18788e+06	7.67253e+06	1.02545e+06	1.15914e+07	7.95017e+06	3.7888e+06	1.5759e+07	2.08177e+06	865720	6.1786e+06
H4C1	P62805	Histone H4 OS=Homo sapiens OX=9606 GN=H4C1 PE=1 SV=2	6	870014	3.03671e+06	660686	339862	1.57778e+06	856501	884216	374394	1.11503e+06	891085	1.16819e+06	832395	2.2075e+07	1.69549e+06	757415	574330	989925	1.5451e+06	491654	525631	1.0607e+06	651860
IGFBP5	P24593	Insulin-like growth factor-binding protein 5 OS=Homo sapiens OX=9606 GN=IGFBP5 PE=1 SV=1	7	1.01847e+07	9.52675e+06	9.7219e+06	1.54236e+07	9.77668e+06	9.59621e+06	1.03208e+07	6.39858e+06	1.25141e+07	1.02147e+07	7.51112e+06	1.0369e+07	5.38021e+06	9.22208e+06	1.02548e+07	9.24926e+06	1.02065e+07	1.80674e+07	7.73737e+06	4.25451e+06	9.55244e+06	1.1343e+07
HBB	P68871	Hemoglobin subunit beta OS=Homo sapiens OX=9606 GN=HBB PE=1 SV=2	4	2.78604e+06	2.25228e+06	2.12827e+06	897865	5.20676e+06	2.66156e+06	6.73738e+06	642325	5.80884e+06	1.2707e+06	919552	1.58719e+06	6.87306e+06	1.39454e+06	1.55114e+06	1.75761e+06	464680	816002	287014	1.91579e+06	7.10336e+06	359573
APOM	O95445	Apolipoprotein M OS=Homo sapiens OX=9606 GN=APOM PE=1 SV=2	9	7.64382e+07	7.76283e+07	8.45135e+07	6.30781e+07	6.67924e+07	7.24447e+07	8.56619e+07	8.68835e+07	9.2192e+07	6.21407e+07	8.12468e+07	6.94281e+07	4.4361e+07	7.00509e+07	7.93465e+07	8.95512e+07	8.81649e+07	7.31605e+07	1.04503e+08	5.86995e+07	7.79113e+07	9.05341e+07
CTSG	P08311	Cathepsin G OS=Homo sapiens OX=9606 GN=CTSG PE=1 SV=2	8	2.03276e+06	3.13589e+06	3.12662e+06	1.47916e+06	645616	4.09208e+06	1.88298e+06	5.20688e+06	1.08585e+06	506365	1.07014e+06	1.23192e+06	1.00649e+07	4.39353e+06	2.53513e+06	1.18454e+06	2.32857e+06	2.20463e+06	5.88147e+06	276983	1.70261e+06	786540
TGFBI	Q15582	Transforming growth factor-beta-induced protein ig-h3 OS=Homo sapiens OX=9606 GN=TGFBI PE=1 SV=1	10	5.39976e+06	5.73839e+06	6.81418e+06	6.77869e+06	3.07907e+06	4.61992e+06	4.6421e+06	5.65224e+06	7.21872e+06	6.83978e+06	3.34875e+06	5.00413e+06	1.1473e+07	4.29494e+06	6.92467e+06	5.05782e+06	4.12577e+06	9.98986e+06	3.77042e+06	2.73467e+06	6.05247e+06	2.96032e+06
F11	P03951	Coagulation factor XI OS=Homo sapiens OX=9606 GN=F11 PE=1 SV=1	11	1.55417e+07	1.61032e+07	2.92834e+07	2.31135e+07	1.30689e+07	1.1149e+07	2.32111e+07	7.86678e+06	8.39059e+06	1.25774e+07	1.23214e+07	1.44349e+07	1.46276e+07	2.4182e+07	2.15544e+07	1.60743e+07	1.98609e+07	9.72927e+06	1.1201e+07	1.12299e+07	1.35724e+07	1.89999e+07
MPO	P05164	Myeloperoxidase OS=Homo sapiens OX=9606 GN=MPO PE=1 SV=1	9	3.15662e+06	6.12863e+06	2.86742e+06	2.79955e+06	4.55657e+06	2.69791e+06	1.8757e+06	2.98565e+06	3.85996e+06	2.42373e+06	2.54214e+06	4.95759e+06	3.07494e+07	6.56595e+06	2.38182e+06	3.16423e+06	2.6313e+06	6.14066e+06	2.2207e+06	1.8385e+06	3.00451e+06	2.58932e+06
CFHR4	Q92496	Complement factor H-related protein 4 OS=Homo sapiens OX=9606 GN=CFHR4 PE=1 SV=3	4	1.325e+08	1.26031e+08	9.73854e+07	1.33804e+08	1.52535e+08	1.58842e+08	9.37386e+07	1.20448e+08	1.31324e+08	9.77637e+07	1.88716e+08	1.50444e+08	2.96865e+08	1.57369e+08	9.75455e+07	7.59142e+07	1.42609e+08	7.23436e+07	5.36427e+07	1.40611e+08	1.58923e+08	6.44843e+07
MYH9	P35579	Myosin-9 OS=Homo sapiens OX=9606 GN=MYH9 PE=1 SV=4	9	286974	556107	212492	368118	251613	347194	66137.4	172851	491932	93744.5	275552	590105	1.32637e+06	609928	36375.3	660361	171255	1.35741e+06	435858	137569	732629	93312.3
YWHAG	P61981	14-3-3 protein gamma OS=Homo sapiens OX=9606 GN=YWHAG PE=1 SV=2	3	1.8955e+06	2.38742e+06	2.15327e+06	501573	2.52179e+06	1.48849e+06	1.93235e+06	1.66385e+06	3.80627e+06	1.29815e+06	1.89738e+06	1.69192e+06	7.19149e+06	813431	1.49289e+06	2.22338e+06	1.37974e+06	3.34432e+06	1.50142e+06	940911	3.38882e+06	1.59777e+06
SERPINE2	P07093	Glia-derived nexin OS=Homo sapiens OX=9606 GN=SERPINE2 PE=1 SV=1	8	1.02934e+07	8.14406e+06	1.9353e+07	3.22884e+06	1.40879e+07	9.23244e+06	9.50573e+06	1.59233e+07	1.01567e+07	6.96882e+06	7.49329e+06	6.98356e+06	1.15443e+07	8.49263e+06	5.35846e+06	6.31484e+06	1.01037e+07	7.00736e+06	8.1877e+06	1.07069e+07	6.73065e+06	6.99401e+06
PDIA3	P30101	Protein disulfide-isomerase A3 OS=Homo sapiens OX=9606 GN=PDIA3 PE=1 SV=4	7	6.84868e+06	7.50188e+06	1.13951e+07	8.37382e+06	7.6544e+06	6.66037e+06	5.34908e+06	3.57668e+06	4.34484e+06	6.12051e+06	7.30841e+06	7.70364e+06	5.85966e+06	7.34677e+06	6.78957e+06	8.0825e+06	8.9579e+06	5.28355e+06	8.89627e+06	8.22737e+06	7.23879e+06	8.33639e+06
C2	P06681	Complement C2 OS=Homo sapiens OX=9606 GN=C2 PE=1 SV=2	8	7.05382e+06	8.17732e+06	8.65595e+06	1.09406e+07	7.2571e+06	4.55016e+06	9.13214e+06	3.98296e+06	6.30632e+06	7.45817e+06	6.54826e+06	5.70654e+06	1.69465e+07	5.35909e+06	9.71498e+06	8.51027e+06	8.64131e+06	5.07073e+06	7.66027e+06	4.94556e+06	5.33168e+06	9.59275e+06
CST3	P01034	Cystatin-C OS=Homo sapiens OX=9606 GN=CST3 PE=1 SV=1	5	2.80961e+06	2.65968e+06	2.70726e+06	3.39794e+06	2.76103e+06	2.60288e+06	4.23941e+06	1.01975e+06	2.34793e+06	2.84111e+06	3.36135e+06	2.81747e+06	2.23403e+06	3.10167e+06	2.72498e+06	4.89018e+06	1.51693e+06	3.65087e+06	2.12538e+06	2.46362e+06	2.17691e+06	1.71219e+06
LRP1	Q07954	Prolow-density lipoprotein receptor-related protein 1 OS=Homo sapiens OX=9606 GN=LRP1 PE=1 SV=2	7	3.6479e+06	3.18476e+06	4.47408e+06	2.9142e+06	1.72436e+06	2.7041e+06	2.69893e+06	6.98836e+06	3.9574e+06	3.02458e+06	3.06372e+06	4.92929e+06	4.28725e+06	2.53742e+06	2.21213e+06	3.4203e+06	1.93619e+06	3.91362e+06	5.65131e+06	1.59469e+06	4.01571e+06	2.27894e+06
HYOU1	Q9Y4L1	Hypoxia up-regulated protein 1 OS=Homo sapiens OX=9606 GN=HYOU1 PE=1 SV=1	5	1.51589e+06	1.91516e+06	1.60548e+06	357734	1.46341e+06	1.46961e+06	2.48655e+06	1.2281e+06	2.17155e+06	1.92738e+06	999282	1.44981e+06	1.12573e+06	1.21515e+06	2.07002e+06	1.074e+06	3.40485e+06	1.75946e+06	2.84698e+06	2.88996e+06	1.13803e+06	1.62741e+06
NID1	P14543	Nidogen-1 OS=Homo sapiens OX=9606 GN=NID1 PE=1 SV=3	8	1.6507e+06	2.55572e+06	2.29953e+06	1.14923e+06	1.61231e+06	1.47214e+06	1.64077e+06	1.16979e+06	2.56424e+06	1.39822e+06	1.43899e+06	1.76181e+06	3.38189e+06	2.5032e+06	1.68732e+06	2.33547e+06	2.19381e+06	4.80317e+06	1.81912e+06	1.55862e+06	3.54225e+06	1.73239e+06
CNDP1	Q96KN2	Beta-Ala-His dipeptidase OS=Homo sapiens OX=9606 GN=CNDP1 PE=1 SV=4	9	7.7275e+06	7.29666e+06	8.43816e+06	4.41887e+06	9.80315e+06	6.2565e+06	8.12674e+06	5.30449e+06	1.15929e+07	1.21936e+07	6.51286e+06	4.62772e+06	5.19232e+06	7.32169e+06	7.75845e+06	8.04792e+06	1.26449e+07	5.42313e+06	4.558e+06	6.34321e+06	9.16985e+06	6.50707e+06
DMKN	Q6E0U4	Dermokine OS=Homo sapiens OX=9606 GN=DMKN PE=1 SV=3	6	2.21839e+06	2.6904e+06	3.07763e+06	977428	877107	1.3334e+06	1.99588e+06	2.86779e+06	4.15794e+06	2.0559e+06	3.01408e+06	1.8268e+06	2.00895e+06	2.99751e+06	3.31192e+06	3.12725e+06	3.01754e+06	3.21178e+06	1.52041e+06	1.97271e+06	4.17168e+06	1.56423e+06
BPIFB1	Q8TDL5	BPI fold-containing family B member 1 OS=Homo sapiens OX=9606 GN=BPIFB1 PE=1 SV=1	6	2.92486e+06	5.25755e+06	456625	3.37614e+06	1.45348e+06	3.03601e+06	6.52335e+06	3.11534e+06	1.35292e+06	1.98764e+06	951964	6.99515e+06	263644	5.29063e+06	1.20835e+07	2.56853e+06	2.18645e+06	1.49688e+07	5.45103e+06	5.21833e+06	4.29367e+06	250866
TPM4	P67936	Tropomyosin alpha-4 chain OS=Homo sapiens OX=9606 GN=TPM4 PE=1 SV=3	4	714797	967312	627955	641322	778549	640252	490297	250992	2.03994e+06	124762	259837	1.29406e+06	636186	1.00889e+06	511665	929297	839598	2.47893e+06	934584	816172	1.13075e+06	387039
CETP	P11597	Cholesteryl ester transfer protein OS=Homo sapiens OX=9606 GN=CETP PE=1 SV=2	4	1.67091e+07	1.56826e+07	1.08672e+07	1.02532e+07	1.96215e+07	1.70159e+07	1.40283e+07	1.96983e+07	2.04233e+07	2.5205e+07	1.63034e+07	1.36753e+07	2.12281e+07	2.09644e+07	2.17189e+07	1.77074e+07	1.34995e+07	1.4924e+07	1.20553e+07	1.15904e+07	1.3067e+07	1.00708e+07
ADIPOQ	Q15848	Adiponectin OS=Homo sapiens OX=9606 GN=ADIPOQ PE=1 SV=1	5	1.96169e+06	1.96852e+06	1.17781e+06	1.39128e+06	2.13307e+06	6.23817e+06	2.67728e+06	396152	1.0698e+06	1.95265e+06	260502	2.32024e+06	1.10731e+06	2.00916e+06	526006	5.9352e+06	1.5993e+06	1.96496e+06	2.15374e+06	716109	791154	2.88226e+06
COL18A1	P39060	Collagen alpha-1(XVIII) chain OS=Homo sapiens OX=9606 GN=COL18A1 PE=1 SV=5	6	5.10857e+06	4.81336e+06	6.79552e+06	4.09978e+06	5.86166e+06	4.53596e+06	6.04329e+06	3.57719e+06	5.57598e+06	4.82159e+06	6.97738e+06	2.79738e+06	3.59937e+06	9.27329e+06	4.70047e+06	3.83847e+06	4.86799e+06	7.40535e+06	4.59339e+06	2.11645e+06	4.58406e+06	3.15473e+06
ANTXR2	P58335	Anthrax toxin receptor 2 OS=Homo sapiens OX=9606 GN=ANTXR2 PE=1 SV=5	3	1.98489e+06	1.57512e+06	2.65552e+06	1.83439e+06	3.32735e+06	1.19279e+06	2.00605e+06	585463	2.39119e+06	1345870	2.79942e+06	1.71086e+06	470305	1.87529e+06	1.21824e+06	1.20985e+06	2.9697e+06	1.15355e+06	1.90323e+06	266663	3.20143e+06	1.48294e+06
IGLV1-51	P01701	Immunoglobulin lambda variable 1-51 OS=Homo sapiens OX=9606 GN=IGLV1-51 PE=1 SV=2	4	1.85757e+06	1.43724e+06	2.94235e+06	737171	1.22349e+06	755455	2.91889e+06	1.35501e+06	841640	1.87667e+06	3.37415e+06	2.55082e+06	956647	989654	1.46021e+06	938835	461663	3.59483e+06	2.53819e+06	1.00101e+06	688498	1.74288e+06
PGLYRP2	Q96PD5	N-acetylmuramoyl-L-alanine amidase OS=Homo sapiens OX=9606 GN=PGLYRP2 PE=1 SV=1	6	3.8037e+06	3.86329e+06	6.27016e+06	5.41503e+06	5.10137e+06	723435	2.21761e+06	1.87537e+06	3.02597e+06	3.2593e+06	5.46239e+06	4.68639e+06	3.95457e+06	4.27413e+06	3.58652e+06	2.12672e+06	4.14296e+06	3.12583e+06	3.96475e+06	3.55075e+06	4.09014e+06	5.81652e+06
IGKV3-20	P01619	Immunoglobulin kappa variable 3-20 OS=Homo sapiens OX=9606 GN=IGKV3-20 PE=1 SV=2	2	8.34078e+07	1.02698e+08	5.51249e+07	1.43093e+08	7.78639e+07	5.22004e+07	7.23975e+07	1.29191e+08	8.26137e+07	4.1922e+07	1.02566e+08	7.7106e+07	6.54566e+07	1.08388e+08	1.02768e+08	8.61209e+07	1.02073e+08	2.22418e+08	7.35084e+07	8.38997e+07	5.74432e+07	1.24908e+08
APOF	Q13790	Apolipoprotein F OS=Homo sapiens OX=9606 GN=APOF PE=1 SV=2	5	3.34308e+06	3.60597e+06	2.72129e+06	3.96791e+06	3.83408e+06	3.34438e+06	2.80875e+06	916743	3.96511e+06	2.53702e+06	4.31393e+06	5.02155e+06	4.75382e+06	3.58108e+06	1.82472e+06	4.13459e+06	1.85192e+06	6.00039e+06	6.79898e+06	3.43663e+06	2.08646e+06	1.59109e+06
COMP	P49747	Cartilage oligomeric matrix protein OS=Homo sapiens OX=9606 GN=COMP PE=1 SV=2	5	2.99634e+06	3.15872e+06	3.35607e+06	2.07879e+06	2.19701e+06	1.39103e+06	3.46356e+06	576682	4.69664e+06	5.46369e+06	3.59675e+06	3.14313e+06	782761	2.71125e+06	6.13345e+06	6.0738e+06	2.74743e+06	3.63129e+06	726827	1.75417e+06	2.93275e+06	4.09347e+06
F10	P00742	Coagulation factor X OS=Homo sapiens OX=9606 GN=F10 PE=1 SV=2	8	5.31361e+07	4.33976e+07	8.36199e+07	5.0494e+07	4.8427e+07	5.45882e+07	5.48506e+07	5.43117e+07	4.7006e+07	4.61455e+07	4.56085e+07	4.63095e+07	2.18592e+07	4.41455e+07	4.12371e+07	3.60331e+07	5.93651e+07	5.51536e+07	5.36059e+07	4.62343e+07	3.95768e+07	3.67656e+07
ACTBL2	Q562R1	Beta-actin-like protein 2 OS=Homo sapiens OX=9606 GN=ACTBL2 PE=1 SV=2	1	3.35244e+06	4.92153e+06	2.38995e+06	2.20498e+06	2.69434e+06	2.51814e+06	4.88595e+06	4.36461e+06	4.37354e+06	3.69695e+06	3.75048e+06	2.64544e+06	1.47082e+07	4.22297e+06	3.11831e+06	5.25396e+06	2.40749e+06	4.31502e+06	5.07231e+06	3.31573e+06	3.74212e+06	3.05922e+06
TGFB1	P01137	Transforming growth factor beta-1 proprotein OS=Homo sapiens OX=9606 GN=TGFB1 PE=1 SV=2	6	7.21896e+06	8.1696e+06	1.01819e+07	161219	1.07132e+07	1.02453e+07	5.32579e+06	9.02561e+06	1.20243e+07	2.35638e+06	7.38797e+06	4.76798e+06	1.26402e+07	6.41277e+06	4.16458e+06	5.54989e+06	5.1262e+06	1.35011e+07	1.20048e+07	6.02873e+06	9.17614e+06	7.09147e+06
PRKCSH	P14314	Glucosidase 2 subunit beta OS=Homo sapiens OX=9606 GN=PRKCSH PE=1 SV=2	6	6.40703e+06	5.8829e+06	5.06659e+06	4.94816e+06	5.67984e+06	7.00372e+06	8.33234e+06	5.61767e+06	7.27799e+06	4.8276e+06	5.75501e+06	9.56136e+06	4.36996e+06	6.05791e+06	9.3093e+06	5.71692e+06	4.64661e+06	6.17828e+06	4.04466e+06	5.86472e+06	9.27036e+06	3.37026e+06
LBP	P18428	Lipopolysaccharide-binding protein OS=Homo sapiens OX=9606 GN=LBP PE=1 SV=3	8	1.06334e+07	1.26626e+07	1.00189e+07	2.05155e+07	3.61582e+06	1.11472e+07	7.12501e+06	1.1212e+07	6.81079e+06	1.08573e+07	8.68955e+06	1.63414e+07	3.36591e+07	6.67902e+06	6.72587e+06	5.97876e+06	4.87749e+06	1.35325e+07	2.6e+07	1.42551e+07	8.93774e+06	5.98042e+06
TPM3	P06753	Tropomyosin alpha-3 chain OS=Homo sapiens OX=9606 GN=TPM3 PE=1 SV=2	3	3.32939e+06	4.60947e+06	3.09937e+06	2.50082e+06	3.26699e+06	4.02981e+06	1.90972e+06	3.08539e+06	7.80209e+06	1.43548e+06	2.16852e+06	3.9957e+06	5.3721e+06	4.86118e+06	2.29396e+06	3.83626e+06	3.70749e+06	8.04671e+06	5.60597e+06	4.95831e+06	5.09595e+06	2.31679e+06
THBS4	P35443	Thrombospondin-4 OS=Homo sapiens OX=9606 GN=THBS4 PE=1 SV=2	3	2.24348e+06	3.85638e+06	2.21929e+06	3.30652e+06	2.85135e+06	1.00749e+06	2.04794e+06	662837	1.46692e+06	3.16057e+06	2.81617e+06	2.89573e+06	2.8922e+06	2.4713e+06	2.87446e+06	3.16605e+06	8.41627e+06	3.71382e+06	4.31529e+06	1.59573e+06	4.79689e+06	4.32181e+06
VIM	P08670	Vimentin OS=Homo sapiens OX=9606 GN=VIM PE=1 SV=4	6	1.11308e+06	544970	2.64874e+06	251545	325724	237982	3.3253e+06	3.31854e+06	421243	168690	346337	86713.5	1.64103e+06	979144	159665	144586	331702	827371	466228	307982	521923	70065.3
CORO1A	P31146	Coronin-1A OS=Homo sapiens OX=9606 GN=CORO1A PE=1 SV=4	5	117185	703612	51766	270491	50178.7	28967.8	269933	39687.6	336783	49794.7	58697.4	15546.5	5.22497e+06	365643	31020.4	536811	25295.7	300859	158459	90009.3	139006	164054
A1BG	P04217	Alpha-1B-glycoprotein OS=Homo sapiens OX=9606 GN=A1BG PE=1 SV=4	6	1.45327e+07	1.7441e+07	1.61432e+07	2.02942e+07	1.3198e+07	1.32986e+07	1.30733e+07	1.17653e+07	1.22459e+07	1.79757e+07	1.68306e+07	1.05018e+07	2.58793e+07	2.11667e+07	1.55956e+07	1.75574e+07	1.43196e+07	2.25302e+07	1.45205e+07	1.00181e+07	1.5962e+07	1.68603e+07
IGLV1-47	P01700	Immunoglobulin lambda variable 1-47 OS=Homo sapiens OX=9606 GN=IGLV1-47 PE=1 SV=2	3	2.73096e+07	2.9208e+07	1.66455e+07	1.43498e+07	3.07611e+07	2.50597e+07	2.58395e+07	5.16443e+07	1.48931e+07	2.43286e+07	3.76325e+07	3.19416e+07	1.86422e+07	2.48583e+07	3.39669e+07	4.40642e+07	1.65532e+07	4.59404e+07	2.34888e+07	2.13124e+07	4.69124e+07	1.63411e+07
SERPINA3	P01011	Alpha-1-antichymotrypsin OS=Homo sapiens OX=9606 GN=SERPINA3 PE=1 SV=2	8	8.00924e+06	8.49263e+06	1.16378e+07	9.38449e+06	5.80237e+06	9.8037e+06	8.05761e+06	4.94018e+06	9.32821e+06	7.54478e+06	8.11942e+06	5.47382e+06	7.09209e+06	1.05498e+07	6.99811e+06	1.31865e+07	4.38458e+06	1.12109e+07	8.76324e+06	7.94166e+06	8.73634e+06	6.0631e+06
CRP	P02741	C-reactive protein OS=Homo sapiens OX=9606 GN=CRP PE=1 SV=1	4	1.22796e+08	2.58845e+08	1.12635e+08	1.2706e+08	4.14935e+07	6.33576e+07	6.64379e+07	1.22495e+08	6.69283e+07	1.48867e+08	1.27272e+08	3.51416e+08	1.11623e+09	5.71205e+07	5.01492e+07	4.42013e+07	1.69968e+07	2.48795e+08	3.02803e+08	5.95255e+08	1.17297e+08	3.96053e+07
KRT5	P13647	Keratin, type II cytoskeletal 5 OS=Homo sapiens OX=9606 GN=KRT5 PE=1 SV=3	5	2.35858e+06	1.0478e+06	3.19354e+06	6.75585e+06	1.45599e+06	895015	406855	602994	787355	127163	8.35295e+06	1.00806e+06	1.02137e+06	294825	2.88838e+06	1.21798e+06	2.16075e+06	346692	245518	523705	293362	1.48538e+06
ANGPTL3	Q9Y5C1	Angiopoietin-related protein 3 OS=Homo sapiens OX=9606 GN=ANGPTL3 PE=1 SV=1	7	4.72228e+06	6.12692e+06	3.94203e+06	1.94184e+06	4.94439e+06	6.31911e+06	3.14421e+06	6.3618e+06	8.38202e+06	4.07118e+06	4.87604e+06	3.24016e+06	5.90883e+06	4.97655e+06	7.68552e+06	5.48709e+06	5.67648e+06	5.2525e+06	5.54172e+06	1.112e+07	6.3088e+06	3.31168e+06
KHSRP	Q92945	Far upstream element-binding protein 2 OS=Homo sapiens OX=9606 GN=KHSRP PE=1 SV=4	7	145441	474076	157511	16651.1	248869	56058.4	136189	44844	270368	226701	141096	156122	3.61896e+06	152343	160851	142683	118843	215711	201871	78124.7	32324.2	19047.5
POSTN	Q15063	Periostin OS=Homo sapiens OX=9606 GN=POSTN PE=1 SV=2	4	1.24488e+06	1.1978e+06	1.97311e+06	1.43707e+06	1.26107e+06	734113	1.06758e+06	428887	883331	1.62807e+06	1.50585e+06	1.52971e+06	1.00946e+06	1.67212e+06	2.11686e+06	1.96752e+06	965404	1.30982e+06	592526	450676	1.43843e+06	455150
AFM	P43652	Afamin OS=Homo sapiens OX=9606 GN=AFM PE=1 SV=1	7	9.94194e+06	7.03097e+06	9.41303e+06	1.08757e+07	1.02806e+07	5.48194e+06	9.18939e+06	5.05114e+06	7.23173e+06	1.71407e+07	1.08218e+07	1.39334e+07	4.36619e+06	9.8363e+06	7.13547e+06	7.37098e+06	8.38864e+06	7.48929e+06	4.41693e+06	5.02586e+06	6.09273e+06	1.01873e+07
P4HB	P07237	Protein disulfide-isomerase OS=Homo sapiens OX=9606 GN=P4HB PE=1 SV=3	5	2.15833e+06	2.15947e+06	1.83223e+06	1.97149e+06	2.65216e+06	2.39182e+06	2.1944e+06	1.47249e+06	1.86114e+06	2.42176e+06	2.49649e+06	2.28936e+06	1.5712e+06	2.46437e+06	1.5211e+06	2.00535e+06	2.97275e+06	2.88049e+06	2.52207e+06	2.05526e+06	2.25626e+06	1.34587e+06
IGKV3D-20	A0A0C4DH25	Immunoglobulin kappa variable 3D-20 OS=Homo sapiens OX=9606 GN=IGKV3D-20 PE=3 SV=1	2	1.15399e+07	9.72871e+06	5.25805e+06	1.23467e+07	8.91389e+06	2.94399e+06	6.18618e+06	3.91137e+07	1.38211e+07	4.32115e+06	4.91451e+06	1.75794e+07	6.43573e+06	8.34942e+06	1.41072e+07	1.38683e+07	8.71615e+06	1.87256e+07	4.17923e+06	1.13626e+07	5.53375e+06	6.0091e+06
C1QA	P02745	Complement C1q subcomponent subunit A OS=Homo sapiens OX=9606 GN=C1QA PE=1 SV=2	3	3.062e+07	2.6658e+07	2.51679e+07	3.73757e+07	3.32018e+07	2.41748e+07	3.11786e+07	1.61833e+07	3.16729e+07	38103055	3.33181e+07	3.58235e+07	2.14157e+07	3.655e+07	3.0211e+07	4.0144e+07	1.95621e+07	2.48195e+07	2.14397e+07	2.63081e+07	2.1994e+07	2.41356e+07
OIT3	Q8WWZ8	Oncoprotein-induced transcript 3 protein OS=Homo sapiens OX=9606 GN=OIT3 PE=1 SV=2	5	1.40237e+06	1.64844e+06	2.80158e+06	563033	961764	1.08578e+06	1.48276e+06	550446	2.16797e+06	1.38279e+06	1.61446e+06	1.41311e+06	2.1484e+06	1.73475e+06	1.5065e+06	523489	2.30657e+06	3.78327e+06	1.8866e+06	251169	1.59732e+06	746372
INHBE	P58166	Inhibin beta E chain OS=Homo sapiens OX=9606 GN=INHBE PE=1 SV=1	4	2.30568e+06	1.52741e+06	952905	1.64449e+06	1.66969e+06	389619	3.92731e+06	3.14076e+06	4.05428e+06	4.0718e+06	1.81428e+06	1.39165e+06	1.51558e+06	1.07255e+06	1.22589e+06	637077	993360	2.01441e+06	1.26747e+06	1.15362e+06	4.65387e+06	740282
MSN	P26038	Moesin OS=Homo sapiens OX=9606 GN=MSN PE=1 SV=3	7	2.02514e+06	2.80867e+06	4.37361e+06	1.02751e+06	1.74047e+06	1.04352e+06	2.4532e+06	1.13976e+06	2.16791e+06	2.46633e+06	2.47954e+06	1.35956e+06	6.94478e+06	2.59994e+06	2.60175e+06	3.98469e+06	2.57342e+06	2.4953e+06	1.46459e+06	917444	1.50077e+06	3.00405e+06
PLTP	P55058	Phospholipid transfer protein OS=Homo sapiens OX=9606 GN=PLTP PE=1 SV=1	5	1.31003e+07	1.40495e+07	1.0073e+07	1.14662e+07	1.72627e+07	1.24878e+07	1.46415e+07	5.77011e+06	1.72541e+07	1.73251e+07	1.24778e+07	1.22441e+07	1.19535e+07	1.44281e+07	1.43127e+07	1.92198e+07	8.23482e+06	1.98222e+07	1.44848e+07	1.26038e+07	1.48032e+07	1.06322e+07
AGT	P01019	Angiotensinogen OS=Homo sapiens OX=9606 GN=AGT PE=1 SV=1	4	6.01176e+06	6.60287e+06	4.75681e+06	8.09122e+06	6.28378e+06	6.34606e+06	6.20085e+06	6.86134e+06	6.57399e+06	5.0321e+06	6.03689e+06	3.93452e+06	7.04078e+06	7.96081e+06	9.8725e+06	5.85929e+06	4.00013e+06	8.76088e+06	8.85826e+06	2.60153e+06	4.07518e+06	6.99938e+06
IGFBP4	P22692	Insulin-like growth factor-binding protein 4 OS=Homo sapiens OX=9606 GN=IGFBP4 PE=1 SV=2	4	4.70876e+06	3.19832e+06	3.63013e+06	7.3027e+06	2.96284e+06	2.18149e+06	4.78908e+06	4.44833e+06	4.18685e+06	8.77022e+06	5.77731e+06	3.03866e+06	5.13996e+06	3.19469e+06	2.66145e+06	3.50751e+06	1.44363e+06	3.66768e+06	3.22494e+06	1.50233e+06	4.65394e+06	2.9871e+06
GAPDH	P04406	Glyceraldehyde-3-phosphate dehydrogenase OS=Homo sapiens OX=9606 GN=GAPDH PE=1 SV=3	4	6.30707e+06	8.00785e+06	3.53361e+06	4.1101e+06	9.73436e+06	6.97434e+06	7.83507e+06	2.9528e+06	1.32134e+07	2.74846e+06	5.17904e+06	6.78951e+06	2.00241e+07	5.45161e+06	3.50631e+06	3.34002e+06	2.86138e+06	3.20796e+06	4.485e+06	2.19634e+07	1.21933e+07	3.04542e+06
MAN1A1	P33908	Mannosyl-oligosaccharide 1,2-alpha-mannosidase IA OS=Homo sapiens OX=9606 GN=MAN1A1 PE=1 SV=3	4	2.75407e+06	2.99067e+06	3.76638e+06	1.40649e+06	2.09428e+06	2.12314e+06	3.14278e+06	3.09661e+06	2.71675e+06	2.42868e+06	4.47311e+06	2.29248e+06	5.99519e+06	2.58483e+06	2.14144e+06	3.21711e+06	3.20106e+06	3.45395e+06	1.01797e+06	1.64223e+06	3.27549e+06	3.37742e+06
BTD	P43251	Biotinidase OS=Homo sapiens OX=9606 GN=BTD PE=1 SV=2	4	2.0893e+06	1.75986e+06	2.8584e+06	1.4194e+06	2.29489e+06	1.07849e+06	2.19178e+06	1.68606e+06	2.84097e+06	3.74409e+06	2.11419e+06	664763	1.17686e+06	2.76117e+06	2.34876e+06	1.19544e+06	2.61081e+06	2.06022e+06	1.03415e+06	1.46417e+06	1.66571e+06	1.28131e+06
MINPP1	Q9UNW1	Multiple inositol polyphosphate phosphatase 1 OS=Homo sapiens OX=9606 GN=MINPP1 PE=1 SV=1	5	1.82504e+06	2.09306e+06	1.81534e+06	1.55911e+06	1.65834e+06	1.47494e+06	1.91128e+06	868370	2.92095e+06	2.84935e+06	1.67986e+06	1.51287e+06	1.7545e+06	2.79546e+06	2.77278e+06	1.88016e+06	1.08518e+06	3.47487e+06	2.0252e+06	1.4529e+06	1.93913e+06	1.75046e+06
TSKU	Q8WUA8	Tsukushin OS=Homo sapiens OX=9606 GN=TSKU PE=2 SV=3	2	1.29203e+07	1.64035e+07	1.73409e+07	1.27045e+07	1.12269e+07	8.65029e+06	1.34422e+07	5.24772e+06	1.65646e+07	1.72873e+07	1.36419e+07	1.30971e+07	1.7184e+07	1.32769e+07	1.50249e+07	1.20834e+07	1.50418e+07	2.23296e+07	1.85519e+07	1.80281e+07	1.48475e+07	1.76671e+07
EFEMP1	Q12805	EGF-containing fibulin-like extracellular matrix protein 1 OS=Homo sapiens OX=9606 GN=EFEMP1 PE=1 SV=2	3	1.47536e+06	1.85442e+06	3.55169e+06	2.35974e+06	1.34038e+06	1.05108e+06	1.11252e+06	394439	1.62356e+06	1.30188e+06	1.30758e+06	710691	2.41002e+06	1.55437e+06	1.41429e+06	2.03538e+06	2.10449e+06	2.84678e+06	1.81457e+06	988153	1.79234e+06	1.58382e+06
NAGLU	P54802	Alpha-N-acetylglucosaminidase OS=Homo sapiens OX=9606 GN=NAGLU PE=1 SV=2	2	1.29109e+06	990027	912631	673492	962955	877656	1.45792e+06	962770	1.67083e+06	2.73733e+06	1.76731e+06	888062	846250	876223	665587	1.27963e+06	903728	1.0843e+06	1.23367e+06	914223	1.20822e+06	888443
PAPLN	O95428	Papilin OS=Homo sapiens OX=9606 GN=PAPLN PE=2 SV=4	5	1.0374e+06	1.48669e+06	1.36023e+06	850455	812685	1.96084e+06	1.11104e+06	1.09159e+06	532818	942732	732209	979419	1.21395e+06	1.80757e+06	2.0721e+06	915398	2.28528e+06	1.65361e+06	1.45701e+06	839064	1.65285e+06	970052
APLP1	P51693	Amyloid-like protein 1 OS=Homo sapiens OX=9606 GN=APLP1 PE=1 SV=3	5	1.26514e+06	1.72176e+06	2.10394e+06	590923	1.3413e+06	1.10432e+06	2.32442e+06	595085	1.08845e+06	1255818	815562	1.43156e+06	1.30175e+06	1.9168e+06	1.7648e+06	1.86081e+06	1.63336e+06	1.69611e+06	1.2259e+06	1.73112e+06	1.92904e+06	2.15795e+06
IGKV2-24	A0A0C4DH68	Immunoglobulin kappa variable 2-24 OS=Homo sapiens OX=9606 GN=IGKV2-24 PE=3 SV=1	4	1.14925e+06	1.01904e+06	1.19608e+06	1.152e+06	1.15554e+06	943756	1.03847e+06	488814	932437	3.43697e+06	376543	771933	378281	1.81618e+06	1.26825e+06	692041	1.25355e+06	1.42377e+06	532441	649856	779389	1.39665e+06
COLEC11	Q9BWP8	Collectin-11 OS=Homo sapiens OX=9606 GN=COLEC11 PE=1 SV=1	3	1.4349e+06	1.20936e+06	1.80389e+06	1.8534e+06	1.36837e+06	937151	1.31873e+06	677136	1.87751e+06	1.62816e+06	1.86165e+06	1.02305e+06	1.03894e+06	1.3429e+06	2.35403e+06	1.19645e+06	1.4053e+06	1.02836e+06	908105	381019	1.04481e+06	1.39369e+06
CFD	P00746	Complement factor D OS=Homo sapiens OX=9606 GN=CFD PE=1 SV=5	5	575037	494052	294502	1.07585e+06	534605	630903	670711	194886	393278	848671	589750	517217	125953	868138	322286	1.01489e+06	291380	643003	247388	546662	319541	561276
FLT4	P35916	Vascular endothelial growth factor receptor 3 OS=Homo sapiens OX=9606 GN=FLT4 PE=1 SV=3	4	1.25713e+06	2.17261e+06	699329	1.05965e+06	1.06628e+06	1.5824e+06	1.0698e+06	799218	381791	1.54103e+06	1.07675e+06	3.29509e+06	3.49388e+06	2.12932e+06	1.03696e+06	1.57549e+06	799157	3.16522e+06	2.21355e+06	480417	5.7389e+06	1.09326e+06
IGFALS	P35858	Insulin-like growth factor-binding protein complex acid labile subunit OS=Homo sapiens OX=9606 GN=IGFALS PE=1 SV=1	5	2.77843e+06	2.68004e+06	6.08768e+06	4.97806e+06	3.20015e+06	1.91634e+06	2.60116e+06	1.76439e+06	2.5307e+06	1.45453e+06	1.60755e+06	1.64377e+06	1.00424e+06	5.14167e+06	1.98151e+06	3.43375e+06	2.57617e+06	3.51941e+06	2.28163e+06	1.34883e+06	2.0965e+06	3.41665e+06
RARRES2	Q99969	Retinoic acid receptor responder protein 2 OS=Homo sapiens OX=9606 GN=RARRES2 PE=1 SV=1	3	1.37489e+06	1.25292e+06	932595	2.39646e+06	1.12502e+06	1.47961e+06	1.50295e+06	698465	911020	1.5272e+06	2.4013e+06	774299	1.95638e+06	1.60462e+06	1.09279e+06	1.2618e+06	960524	1.50061e+06	878082	534439	1.54458e+06	1.19539e+06
PRAP1	Q96NZ9	Proline-rich acidic protein 1 OS=Homo sapiens OX=9606 GN=PRAP1 PE=1 SV=2	2	3.24402e+06	3.21146e+06	1.89887e+06	3.64078e+06	4.93175e+06	1.67293e+06	4.62876e+06	2.55676e+06	6.28356e+06	4.46657e+06	557589	1.8026e+06	4.44306e+06	3.04049e+06	5.64752e+06	3.03259e+06	1.46964e+06	2.46502e+06	1.76311e+06	4.12334e+06	4.23582e+06	1.89401e+06
LSR	Q86X29	Lipolysis-stimulated lipoprotein receptor OS=Homo sapiens OX=9606 GN=LSR PE=1 SV=4	3	889975	900158	946177	574531	1.15007e+06	785753	1.16447e+06	285020	1.27698e+06	1.49821e+06	860106	358432	1.19595e+06	1.07379e+06	921944	870647	840056	1.02249e+06	432554	361195	1.57917e+06	703779
SERPINA11	Q86U17	Serpin A11 OS=Homo sapiens OX=9606 GN=SERPINA11 PE=2 SV=2	4	1.18057e+06	1.05808e+06	1.0917e+06	1.21761e+06	1.22234e+06	1.5009e+06	1.84932e+06	178028	1.26661e+06	612828	1.40247e+06	1.46393e+06	651290	1.22528e+06	1.23202e+06	1.31138e+06	1.00933e+06	1.41695e+06	693323	851240	1.32315e+06	866862
H2AW	Q7L7L0	Histone H2A type 3 OS=Homo sapiens OX=9606 GN=H2AW PE=1 SV=3	1	1.93504e+06	4.4661e+06	1.7565e+06	2.04822e+06	3.25661e+06	1.50836e+06	1.1882e+06	1.57224e+06	2.32597e+06	1513332	1.43549e+06	2.74552e+06	2.78127e+07	2.45989e+06	1.5959e+06	1.40676e+06	1.89692e+06	2.39249e+06	1.48352e+06	1.67814e+06	2.12789e+06	1.80676e+06
ADAMTSL4	Q6UY14	ADAMTS-like protein 4 OS=Homo sapiens OX=9606 GN=ADAMTSL4 PE=1 SV=2	5	749998	868655	1.02254e+06	564449	501238	504053	889946	483673	908870	1.06758e+06	428230	1.1294e+06	1.11725e+06	543650	776736	1.1434e+06	681300	1.65375e+06	452634	933632	1.1937e+06	190504
PON3	Q15166	Serum paraoxonase/lactonase 3 OS=Homo sapiens OX=9606 GN=PON3 PE=1 SV=3	2	3.2623e+06	3.25467e+06	3.14432e+06	7.98301e+06	2.75082e+06	3.68417e+06	2.68386e+06	2.11044e+06	1.99845e+06	2.92992e+06	1.807e+06	3.53107e+06	2.84243e+06	4.58344e+06	2.43248e+06	6.87926e+06	2.33372e+06	1.26431e+06	4.37929e+06	1.54083e+06	1.77466e+06	4.51633e+06
MBL2	P11226	Mannose-binding protein C OS=Homo sapiens OX=9606 GN=MBL2 PE=1 SV=2	4	2.48598e+06	4.08518e+06	743742	5.39805e+06	310648	899131	1.43561e+06	579042	6.36971e+06	4.58684e+06	3.00995e+06	1.52706e+06	3.90587e+06	749020	4.39817e+06	1.27933e+06	7.6499e+06	5.49818e+06	3.8297e+06	843637	1.9505e+06	1.07475e+07
F8	P00451	Coagulation factor VIII OS=Homo sapiens OX=9606 GN=F8 PE=1 SV=1	5	285153	312111	299284	286113	85197.4	311291	154347	634131	295195	501811	147491	136665	687674	123501	250480	105747	173339	987102	66785.7	172887	413500	140094
IGLV2-8	P01709	Immunoglobulin lambda variable 2-8 OS=Homo sapiens OX=9606 GN=IGLV2-8 PE=1 SV=2	2	3.51018e+06	5.92275e+06	5.77369e+06	2.05357e+06	3.91487e+06	2.49093e+06	6.18743e+06	3.42265e+06	2.55384e+06	2.24347e+06	1.51179e+06	4.94958e+06	2.58221e+06	1.18305e+07	3.93762e+06	2.7633e+06	5.51253e+06	7.25454e+06	3.55698e+06	3.40209e+06	5.383e+06	1.30047e+07
COL6A3	P12111	Collagen alpha-3(VI) chain OS=Homo sapiens OX=9606 GN=COL6A3 PE=1 SV=5	5	470494	423350	671233	394303	459781	304724	770749	217679	455793	433848	481697	515131	45546.1	533530	502947	923150	338758	609077	294933	35751.2	607717	342086
C4BPB	P20851	C4b-binding protein beta chain OS=Homo sapiens OX=9606 GN=C4BPB PE=1 SV=1	5	7.84642e+06	7.23589e+06	9.4869e+06	7.39154e+06	9.17974e+06	7.1295e+06	8.13838e+06	6.55962e+06	4.29156e+06	5.40681e+06	8.73242e+06	1.21477e+07	5.9675e+06	7.8642e+06	4.70004e+06	5.80164e+06	1.04568e+07	5.94843e+06	1.11439e+07	5.7893e+06	6.89893e+06	7.7882e+06
YWHAE	P62258	14-3-3 protein epsilon OS=Homo sapiens OX=9606 GN=YWHAE PE=1 SV=1	4	1.41766e+06	1.72731e+06	1.93121e+06	1.13819e+06	1.98978e+06	1.46981e+06	1.10055e+06	801659	3.14004e+06	1.26445e+06	572356	768564	3.60639e+06	2.1752e+06	1.53864e+06	772151	2.05513e+06	1.38014e+06	666151	728249	3.31906e+06	1.03202e+06
IGKV1-17	P01599	Immunoglobulin kappa variable 1-17 OS=Homo sapiens OX=9606 GN=IGKV1-17 PE=1 SV=2	2	889074	954046	738482	515465	1.25311e+06	1.76634e+06	1.00649e+06	761550	501058	935660	707703	704885	647242	1.17896e+06	1.31016e+06	421473	173889	707707	295034	412381	2.09266e+06	2.30095e+06
VAT1	Q99536	Synaptic vesicle membrane protein VAT-1 homolog OS=Homo sapiens OX=9606 GN=VAT1 PE=1 SV=2	5	1.61783e+06	1.66482e+06	2.11483e+06	1.36344e+06	1.62316e+06	815540	1.50621e+06	1.14477e+06	982457	3.19738e+06	1.59527e+06	1.83519e+06	4.8297e+06	1.83819e+06	508702	1.53236e+06	935823	1.73124e+06	1.12228e+06	384636	2.59327e+06	1.17199e+06
TFPI	P10646	Tissue factor pathway inhibitor OS=Homo sapiens OX=9606 GN=TFPI PE=1 SV=1	4	1.22644e+06	1.15858e+06	937837	702682	1.07863e+06	1.54971e+06	1.55175e+06	1.79888e+06	834681	1.72015e+06	1.39136e+06	698696	1.5452e+06	1.25382e+06	1.71876e+06	830409	1.36895e+06	1.64443e+06	799422	844849	874161	705805
IGKV1-8	A0A0C4DH67	Immunoglobulin kappa variable 1-8 OS=Homo sapiens OX=9606 GN=IGKV1-8 PE=3 SV=1	2	545887	561134	212427	701693	914418	581735	260553	622446	314318	699292	759599	392389	400654	636241	351936	1.22413e+06	320871	571933	196192	1.0036e+06	530537	375245
BMP1	P13497	Bone morphogenetic protein 1 OS=Homo sapiens OX=9606 GN=BMP1 PE=1 SV=2	5	4.58172e+06	4.45308e+06	5.28501e+06	3.50506e+06	4.12557e+06	4.67487e+06	4.89193e+06	5.33273e+06	4.28593e+06	4.19427e+06	4.60901e+06	4.91283e+06	3.80796e+06	3.91165e+06	4.49681e+06	3.61683e+06	5.71805e+06	3.74426e+06	4.54166e+06	5.39633e+06	4.33057e+06	4.96662e+06
IGLV3-21	P80748	Immunoglobulin lambda variable 3-21 OS=Homo sapiens OX=9606 GN=IGLV3-21 PE=1 SV=2	2	6.01448e+06	4.40855e+06	1.8585e+06	3.24741e+06	8.41125e+06	5.6613e+06	4.98721e+06	1.76645e+06	1.4729e+07	1.37261e+07	3.60978e+06	2.14783e+06	2.46523e+06	5.15118e+06	7.37277e+06	6.54404e+06	3.01507e+06	5.4464e+06	3.3685e+06	3.15447e+06	2.43175e+06	5.13614e+06
CAMP	P49913	Cathelicidin antimicrobial peptide OS=Homo sapiens OX=9606 GN=CAMP PE=1 SV=1	4	6.04972e+06	6.5459e+06	5.42628e+06	3.76908e+06	8.87055e+06	2.7307e+06	2.95028e+06	1.21667e+07	9.33976e+06	8.53719e+06	4.1218e+06	2.58495e+06	9.75098e+06	4.81469e+06	1.02698e+07	6.92315e+06	7.1788e+06	8.50772e+06	6.14402e+06	5.21811e+06	3.97637e+06	2.67539e+06
NCAM1	P13591	Neural cell adhesion molecule 1 OS=Homo sapiens OX=9606 GN=NCAM1 PE=1 SV=3	3	548716	781669	655343	809765	412322	460715	1.06649e+06	64553.1	411132	809877	348214	448758	83325.8	762883	1.42618e+06	1.76389e+06	757780	1.06858e+06	456283	393360	473448	630961
ITGB1	P05556	Integrin beta-1 OS=Homo sapiens OX=9606 GN=ITGB1 PE=1 SV=2	5	378659	267183	282485	222137	358722	322677	399224	291492	205075	845419	427615	431746	61112.6	474757	223776	600700	284023	552496	142946	84032.5	92867.6	155119
IGKV3D-15	A0A087WSY6	Immunoglobulin kappa variable 3D-15 OS=Homo sapiens OX=9606 GN=IGKV3D-15 PE=3 SV=6	2	2.34681e+06	2.14197e+06	1.11886e+06	1.79151e+06	3.65223e+06	1.30369e+06	1.59964e+06	2.78512e+06	3.21887e+06	1133031	3.69715e+06	3.16801e+06	2.69289e+06	1.54543e+06	1.94706e+06	3.37683e+06	623987	5.19149e+06	1.214e+06	1.10654e+06	1.23758e+06	2.48388e+06
IGFBP7	Q16270	Insulin-like growth factor-binding protein 7 OS=Homo sapiens OX=9606 GN=IGFBP7 PE=1 SV=1	4	681206	599982	691126	508296	695933	722043	625863	352874	896554	1.1903e+06	677085	451988	859150	483622	957227	753550	464274	608125	484361	75571	742236	571701
GANAB	Q14697	Neutral alpha-glucosidase AB OS=Homo sapiens OX=9606 GN=GANAB PE=1 SV=3	4	432237	414117	372282	400112	408212	348221	363076	256039	766752	614786	384178	408713	654229	343031	340001	456086	377843	483654	291423	356946	600337	237623
HSPB1	P04792	Heat shock protein beta-1 OS=Homo sapiens OX=9606 GN=HSPB1 PE=1 SV=2	4	407525	400958	305877	1.24099e+06	413158	593777	167943	267184	521622	249562	39123.2	276016	327373	344881	215544	627968	329029	647150	183724	466271	700293	167344
IGKV3D-11	A0A0A0MRZ8	Immunoglobulin kappa variable 3D-11 OS=Homo sapiens OX=9606 GN=IGKV3D-11 PE=3 SV=6	3	1.46353e+07	1.48919e+07	1.40156e+07	8.44691e+06	1.55169e+07	5.01593e+06	1.01576e+07	9.8112e+06	1.69164e+07	6.85348e+06	1.13404e+07	4.82782e+07	1.02701e+07	1.4838e+07	1.32446e+07	2.53201e+07	1.4775e+07	2.12334e+07	7.09728e+06	8.0852e+06	9.63564e+06	2.44197e+07
GNPTG	Q9UJJ9	N-acetylglucosamine-1-phosphotransferase subunit gamma OS=Homo sapiens OX=9606 GN=GNPTG PE=1 SV=1	3	398030	503714	305898	175194	447891	394914	447554	258845	420789	412670	578966	537575	968230	446255	296413	552589	409088	666351	626047	335836	469252	267078
F9	P00740	Coagulation factor IX OS=Homo sapiens OX=9606 GN=F9 PE=1 SV=2	5	698606	693660	995513	578696	463459	1.73791e+06	557927	444768	357189	911601	647823	291182	272067	1.10915e+06	1.00226e+06	505314	633254	931341	675544	961285	341228	505153
IGKV1-6	A0A0C4DH72	Immunoglobulin kappa variable 1-6 OS=Homo sapiens OX=9606 GN=IGKV1-6 PE=3 SV=1	1	976307	1.42036e+06	1.19766e+06	1.29404e+06	1.47704e+06	941581	804190	652096	711759	588689	1.22841e+06	867607	805239	1.24871e+06	1.1208e+06	1.90092e+06	1.19727e+06	2.02736e+06	1.16808e+06	1.06361e+06	1.20501e+06	2.46657e+06
CD5L	O43866	CD5 antigen-like OS=Homo sapiens OX=9606 GN=CD5L PE=1 SV=1	3	1.99447e+06	1.86671e+06	3.55348e+06	1.32349e+06	2.16983e+06	820626	3.49263e+06	1.71729e+06	1.85959e+06	1.46302e+06	1.79348e+06	1.7513e+06	1.17791e+06	1.89159e+06	2.00377e+06	2.00767e+06	1.76741e+06	1.72639e+06	1.22973e+06	1.3653e+06	1.45638e+06	4.04092e+06
HTRA1	Q92743	Serine protease HTRA1 OS=Homo sapiens OX=9606 GN=HTRA1 PE=1 SV=1	4	952297	948985	883423	727896	725746	716235	802404	751558	1.53488e+06	1.28777e+06	1.33534e+06	757725	1.1173e+06	984948	712738	873046	703838	1.27664e+06	545247	1.06237e+06	1.62459e+06	589131
PCSK6	P29122	Proprotein convertase subtilisin/kexin type 6 OS=Homo sapiens OX=9606 GN=PCSK6 PE=1 SV=1	4	667523	694852	776518	291267	700541	785086	418049	518896	1.57907e+06	499418	695223	411155	1.11956e+06	279607	137898	514697	950940	466340	1.1682e+06	831038	883582	596656
IGHV1-46	P01743	Immunoglobulin heavy variable 1-46 OS=Homo sapiens OX=9606 GN=IGHV1-46 PE=1 SV=2	2	180528	336007	344544	156056	229734	116990	179266	151784	114666	125710	242662	143865	276128	314988	251942	613273	100907	963312	158778	172000	295407	213333
PIGR	P01833	Polymeric immunoglobulin receptor OS=Homo sapiens OX=9606 GN=PIGR PE=1 SV=4	4	783417	1.90334e+06	711546	262393	342876	682532	385679	2.48922e+06	707937	1.18255e+06	735613	333827	904360	859564	2.47222e+06	2.07701e+06	921469	4.73696e+06	3.4156e+06	2.12426e+06	1.0245e+06	497447
IGKV1-5	P01602	Immunoglobulin kappa variable 1-5 OS=Homo sapiens OX=9606 GN=IGKV1-5 PE=1 SV=2	2	1.5879e+06	2.38679e+06	1.04601e+06	1.42331e+06	3.378e+06	636352	2.6566e+06	1.59938e+06	1.34938e+06	1.26029e+06	1.2653e+06	1.26435e+06	425397	1.66702e+06	2.06213e+06	8.46948e+06	2.17788e+06	2.21465e+06	965472	1.01111e+06	790242	4.08456e+06
PAMR1	Q6UXH9	Inactive serine protease PAMR1 OS=Homo sapiens OX=9606 GN=PAMR1 PE=1 SV=1	3	1.34521e+06	1.36519e+06	1.11301e+06	1.19652e+06	796990	1.70514e+06	1.23121e+06	1.6123e+06	1.7063e+06	2.09347e+06	1.25158e+06	745524	1.79432e+06	1.41677e+06	1.10075e+06	887695	1.8885e+06	644296	906813	1.98968e+06	1.53372e+06	1.48936e+06
IGLV7-43	P04211	Immunoglobulin lambda variable 7-43 OS=Homo sapiens OX=9606 GN=IGLV7-43 PE=3 SV=2	2	8.71746e+06	1.13261e+07	8.70513e+06	5.176e+06	8.21477e+06	1.1714e+07	1.3122e+07	6.30336e+06	1.1211e+07	4.97899e+06	9.20239e+06	8.54699e+06	2.60808e+06	2.04386e+07	2.19807e+07	7.96828e+06	6.92423e+06	1.74225e+07	9.88863e+06	3.2686e+06	8.01088e+06	1.47506e+07
TYMP	P19971	Thymidine phosphorylase OS=Homo sapiens OX=9606 GN=TYMP PE=1 SV=2	3	261124	456880	534684	167698	175055	120596	517928	93921	320361	280199	153227	247571	970315	431244	430055	300852	419804	806139	112925	411134	337817	348519
IGLV2-11	P01706	Immunoglobulin lambda variable 2-11 OS=Homo sapiens OX=9606 GN=IGLV2-11 PE=1 SV=2	3	1.33393e+06	2.22525e+06	1.70407e+06	2.097e+06	353388	1.33928e+06	3.05194e+06	1.12341e+06	771603	329022	698130	1.87144e+06	1.67825e+06	5.67883e+06	828393	1.72629e+06	777966	2.98263e+06	1.48618e+06	757796	3.87246e+06	2.4637e+06
PAM	P19021	Peptidyl-glycine alpha-amidating monooxygenase OS=Homo sapiens OX=9606 GN=PAM PE=1 SV=2	4	538910	605106	305933	702609	363876	631335	387002	197920	710142	785834	543944	760509	471831	489611	737923	707179	247647	823583	608867	868974	569196	526251
CALU	O43852	Calumenin OS=Homo sapiens OX=9606 GN=CALU PE=1 SV=2	3	4.15212e+06	4.96584e+06	6.38509e+06	303926	8.05355e+06	3.50707e+06	4.17135e+06	5.96385e+06	5.86652e+06	1.33997e+06	3.01969e+06	2.91015e+06	6.20837e+06	4.07809e+06	1.20729e+06	3.55583e+06	4.76047e+06	9.21465e+06	7.5466e+06	3.46268e+06	4.44275e+06	5.1817e+06
COLEC10	Q9Y6Z7	Collectin-10 OS=Homo sapiens OX=9606 GN=COLEC10 PE=1 SV=2	3	419906	342540	651907	460379	288435	227345	386283	455187	387891	447311	519794	374523	264287	433763	396051	417828	362698	410364	380393	100052	305508	354455
MARCO	Q9UEW3	Macrophage receptor MARCO OS=Homo sapiens OX=9606 GN=MARCO PE=1 SV=1	2	238847	441022	13242.3	58406.8	214901	41793.9	23378.9	14923.8	327623	567495	440430	686275	1.6655e+06	352477	429303	332460	381703	341258	41084.9	274378	343430	248629
MGAT1	P26572	Alpha-1,3-mannosyl-glycoprotein 2-beta-N-acetylglucosaminyltransferase OS=Homo sapiens OX=9606 GN=MGAT1 PE=1 SV=2	4	351201	585267	407103	486141	378535	331980	299499	150876	567716	308945	309763	271457	1.50229e+06	406962	398938	498081	548239	826409	381274	383961	423530	482993
AZGP1	P25311	Zinc-alpha-2-glycoprotein OS=Homo sapiens OX=9606 GN=AZGP1 PE=1 SV=2	3	1.50985e+06	1.40233e+06	1.5945e+06	2.88251e+06	1.67087e+06	1.80686e+06	1.85695e+06	794482	1.0179e+06	1.38728e+06	1.29048e+06	796707	1.79566e+06	2.02249e+06	1.35852e+06	1.5888e+06	959250	1.2239e+06	1.52998e+06	1.54418e+06	1.14896e+06	851553
CD99	P14209	CD99 antigen OS=Homo sapiens OX=9606 GN=CD99 PE=1 SV=1	2	2.5367e+06	3.08485e+06	1.95002e+06	1.33209e+06	2.76692e+06	2.2981e+06	2.63719e+06	2.03462e+06	2.15545e+06	5.51367e+06	2.61322e+06	2.06571e+06	945021	4.31122e+06	2.51453e+06	4.32045e+06	4.42108e+06	2.45945e+06	2.51322e+06	2.83569e+06	2.46848e+06	4.05939e+06
RNASE4	P34096	Ribonuclease 4 OS=Homo sapiens OX=9606 GN=RNASE4 PE=1 SV=3	3	525559	617976	100641	391985	461137	542734	1.02454e+06	367375	484290	336902	819464	726515	1.17843e+06	482088	346236	928388	327619	652443	677889	389401	465832	731442
AMBP	P02760	Protein AMBP OS=Homo sapiens OX=9606 GN=AMBP PE=1 SV=1	3	8.62618e+06	7.69418e+06	6.54406e+06	1.45635e+07	8.17553e+06	1.2661e+07	9.96132e+06	5.29193e+06	7.91607e+06	5.1875e+06	7.94987e+06	8.011e+06	7.28249e+06	5.11238e+06	5.00971e+06	1.38826e+07	4.28217e+06	7.47198e+06	9.23978e+06	8.05262e+06	1.02353e+07	6.37269e+06
FBLN7	Q53RD9	Fibulin-7 OS=Homo sapiens OX=9606 GN=FBLN7 PE=2 SV=1	4	2.12439e+06	1.96367e+06	1.87563e+06	1.64616e+06	3.39746e+06	1.84787e+06	1.91694e+06	1.69297e+06	2.84331e+06	2.32082e+06	1.93189e+06	1.77089e+06	1.08811e+06	2.14191e+06	2.19127e+06	2.26188e+06	2.65014e+06	2.65407e+06	2.07215e+06	1.23122e+06	1.28626e+06	2.0597e+06
MENT	Q9BUN1	Protein MENT OS=Homo sapiens OX=9606 GN=MENT PE=1 SV=1	2	738561	748756	1.48181e+06	757694	726658	200963	857510	419057	653426	700601	512491	1.07541e+06	362728	897724	648123	885454	807907	1.22155e+06	804529	83939	491680	1.28393e+06
INHBC	P55103	Inhibin beta C chain OS=Homo sapiens OX=9606 GN=INHBC PE=2 SV=1	2	7.71444e+06	6.2417e+06	5.00449e+06	7.64982e+06	5.19266e+06	7.46593e+06	7.68798e+06	6.24545e+06	1.25679e+07	11024653	9.11147e+06	5.19408e+06	9.03759e+06	6.14891e+06	6.1719e+06	4.71912e+06	4.7164e+06	5.89266e+06	5.12464e+06	5.86293e+06	9.44136e+06	5.30151e+06
ANGPTL8	Q6UXH0	Angiopoietin-like protein 8 OS=Homo sapiens OX=9606 GN=ANGPTL8 PE=1 SV=1	3	574548	340368	1.08896e+06	169034	771640	455615	682447	288407	450182	862494	398000	578703	12461.1	311755	534369	328347	488454	438593	356335	38050.9	482827	412483
F7	P08709	Coagulation factor VII OS=Homo sapiens OX=9606 GN=F7 PE=1 SV=1	4	411438	326264	313485	921777	338736	344251	372666	105515	277798	513976	583649	342525	152876	444110	329063	481184	246335	397366	142413	511870	362534	194892
PSMA7	O14818	Proteasome subunit alpha type-7 OS=Homo sapiens OX=9606 GN=PSMA7 PE=1 SV=1	4	1.33528e+06	1.3133e+06	1.79949e+06	375038	1.7363e+06	812407	2.00147e+06	2.1942e+06	1.52031e+06	503122	1.34223e+06	1.06823e+06	2.72189e+06	545341	896752	888477	1.16085e+06	332640	2.07838e+06	1.19028e+06	1.85727e+06	1.46111e+06
PTPRF	P10586	Receptor-type tyrosine-protein phosphatase F OS=Homo sapiens OX=9606 GN=PTPRF PE=1 SV=2	2	287379	229228	334774	240636	469515	165313	299909	202559	263122	419303	88982.6	389677	181446	266453	300305	415518	165342	305561	190619	150906	141428	174707
MGP	P08493	Matrix Gla protein OS=Homo sapiens OX=9606 GN=MGP PE=1 SV=2	2	5.62496e+06	5.04779e+06	4.8385e+06	3.79962e+06	6.49691e+06	3.81213e+06	8.65231e+06	2.92185e+06	6.84889e+06	7.44404e+06	7.13024e+06	4.30512e+06	3.41652e+06	4.06874e+06	5.60623e+06	4.93932e+06	8.39923e+06	6.26647e+06	3.82313e+06	2.90349e+06	6.73718e+06	4.31759e+06
AXL	P30530	Tyrosine-protein kinase receptor UFO OS=Homo sapiens OX=9606 GN=AXL PE=1 SV=4	2	2.06525e+06	2.4688e+06	1.19057e+06	1.28682e+06	2.14799e+06	1.5228e+06	2.16637e+06	1.6283e+06	3.54637e+06	3.1269e+06	1.7809e+06	2.25542e+06	2.41415e+06	3.37911e+06	3.67685e+06	3.54138e+06	2.56617e+06	1.27462e+06	1.64982e+06	2.51564e+06	1.5968e+06	2.07349e+06
CANX	P27824	Calnexin OS=Homo sapiens OX=9606 GN=CANX PE=1 SV=2	3	391177	540916	137990	244797	611052	584141	341519	69998.7	529938	371991	575164	445184	473630	226241	827599	476518	226109	751363	549971	892194	779048	206490
IGKV3-7	A0A075B6H7	Probable non-functional immunoglobulin kappa variable 3-7 OS=Homo sapiens OX=9606 GN=IGKV3-7 PE=1 SV=1	1	5.89762e+07	5.85556e+07	6.91741e+07	4.38879e+07	8.41121e+07	3.3403e+07	4.47895e+07	9.44914e+07	5.67248e+07	5.38414e+07	3.68063e+07	7.25318e+07	4.96112e+07	5.37701e+07	6.42597e+07	8.70481e+07	4.38023e+07	9.62936e+07	2.96086e+07	3.11103e+07	4.28483e+07	8.7204e+07
OLFML3	Q9NRN5	Olfactomedin-like protein 3 OS=Homo sapiens OX=9606 GN=OLFML3 PE=2 SV=1	4	824519	870215	789135	622842	885298	659346	847335	562451	1.2775e+06	1.31938e+06	527683	754214	748182	838738	1.27554e+06	750997	737198	1.16748e+06	484973	612923	1.17886e+06	907258
APMAP	Q9HDC9	Adipocyte plasma membrane-associated protein OS=Homo sapiens OX=9606 GN=APMAP PE=1 SV=2	2	1.16547e+06	1.19228e+06	1.47471e+06	1.67322e+06	579335	1.10561e+06	1.414e+06	593233	512379	1.20536e+06	1.17212e+06	1.92471e+06	1.21953e+06	1.39328e+06	494522	1.73933e+06	2.12316e+06	2.06331e+06	997649	499085	185078	1.20789e+06
CA6	P23280	Carbonic anhydrase 6 OS=Homo sapiens OX=9606 GN=CA6 PE=1 SV=3	2	1.5179e+07	1.69663e+07	1.55842e+07	7.88931e+06	2.09967e+07	9.3571e+06	2.31023e+07	1.06696e+07	1.50802e+07	9.08605e+06	2.20264e+07	1.79983e+07	2.70269e+07	2.02184e+07	1.05776e+07	2.12951e+07	1.11051e+07	6.61073e+06	1.37977e+07	1.68981e+07	1.89122e+07	2.32212e+07
RCN1	Q15293	Reticulocalbin-1 OS=Homo sapiens OX=9606 GN=RCN1 PE=1 SV=1	2	499339	522278	572027	395188	650943	370501	728926	306617	389367	714817	429592	435415	209279	541944	434425	414406	1.12256e+06	474848	314878	541411	542002	627031
IGLV3-27	P01718	Immunoglobulin lambda variable 3-27 OS=Homo sapiens OX=9606 GN=IGLV3-27 PE=1 SV=2	2	1.11545e+06	2.32295e+06	57516.3	1.99212e+06	1.14618e+06	287853	454098	779910	2.46764e+06	1.38047e+06	2.0056e+06	583085	754911	1.43479e+06	4.09187e+06	3.26177e+06	1.32554e+06	5.82612e+06	1.85188e+06	2.60963e+06	1.45522e+06	617729
CLEC11A	Q9Y240	C-type lectin domain family 11 member A OS=Homo sapiens OX=9606 GN=CLEC11A PE=1 SV=1	3	754735	892627	672050	1.01429e+06	898844	399171	591272	580156	805074	1.34946e+06	957142	279898	616950	1.14495e+06	871181	828610	864349	764241	1.10186e+06	674342	1.22731e+06	832476
PRSS1	P07477	Trypsin-1 OS=Homo sapiens OX=9606 GN=PRSS1 PE=1 SV=1	1	475071	485850	288493	406268	609907	526897	456253	566269	278325	589493	604626	424177	754713	346733	605626	537733	281301	538394	427330	501887	388340	476445
CFL1	P23528	Cofilin-1 OS=Homo sapiens OX=9606 GN=CFL1 PE=1 SV=3	2	144377	258827	118178	60746.7	223851	227595	41657.7	170882	277644	46652	100220	176346	576284	105845	107613	267255	155522	361961	287862	332541	276208	117181
HYAL1	Q12794	Hyaluronidase-1 OS=Homo sapiens OX=9606 GN=HYAL1 PE=1 SV=2	2	681849	563494	655502	469447	762630	466496	676756	517400	564824	951947	831928	921562	261966	665882	292058	746977	392728	1.02158e+06	980255	542303	470274	260919
IGKV1D-33	P01593	Immunoglobulin kappa variable 1D-33 OS=Homo sapiens OX=9606 GN=IGKV1D-33 PE=1 SV=2	1	164434	406864	58609.8	203079	175721	190210	183535	216755	174414	143634	183659	114719	600704	712827	342902	609912	157321	208465	342768	236126	194856	662761
EHD1	Q9H4M9	EH domain-containing protein 1 OS=Homo sapiens OX=9606 GN=EHD1 PE=1 SV=2	3	123168	259566	217566	107537	94577.3	87130.1	120594	141821	189412	74492.7	90078.1	108472	1.56789e+06	99125.8	91948.5	113573	100380	113624	156924	138512	94895.3	118779
AKAP12	Q02952	A-kinase anchor protein 12 OS=Homo sapiens OX=9606 GN=AKAP12 PE=1 SV=4	3	1.23387e+06	1.28703e+06	886282	790916	1.06637e+06	729115	824686	1.38118e+06	3.04905e+06	1.57415e+06	1.62281e+06	414151	380452	1.44424e+06	1.44229e+06	2.39152e+06	716313	852702	1.1217e+06	837977	2.3825e+06	1.30059e+06
CTSW	P56202	Cathepsin W OS=Homo sapiens OX=9606 GN=CTSW PE=1 SV=2	3	1.27634e+06	1.07068e+06	1.17378e+06	1.68984e+06	1.02632e+06	826532	698013	1.01152e+06	2.14475e+06	1.49233e+06	1.02662e+06	1.67366e+06	1.60194e+06	822755	1.19632e+06	999933	905320	1.32565e+06	1.45499e+06	540942	841699	1.01725e+06
PRSS3	P35030	Trypsin-3 OS=Homo sapiens OX=9606 GN=PRSS3 PE=1 SV=2	1	1.44816e+06	1.61367e+06	1.56916e+06	1.07794e+06	1.26887e+06	1.511e+06	1.86184e+06	1.49005e+06	1.66845e+06	1.69688e+06	1.00488e+06	1.33252e+06	2.022e+06	1.51344e+06	1.67043e+06	1.67391e+06	1.85763e+06	1.57773e+06	1.46733e+06	1.34662e+06	1.43051e+06	1.57714e+06
CPQ	Q9Y646	Carboxypeptidase Q OS=Homo sapiens OX=9606 GN=CPQ PE=1 SV=1	3	244321	410367	272919	84098.6	103493	132556	578501	108646	363871	411609	87940.2	299581	346062	474370	456100	487390	451916	489183	150662	597963	249588	400436
LCP1	P13796	Plastin-2 OS=Homo sapiens OX=9606 GN=LCP1 PE=1 SV=6	2	99255.5	154983	115705	146128	77214.2	45135.3	111865	29697.5	91024.4	127578	122885	125323	397909	182047	57605.3	252605	59546.5	250290	87700.1	61292.9	82588.8	118249
LAMA2	P24043	Laminin subunit alpha-2 OS=Homo sapiens OX=9606 GN=LAMA2 PE=1 SV=4	3	269361	353040	133430	54098.1	369965	137324	272968	199389	426394	517448	199486	383114	629130	262404	374885	363052	390571	614691	200451	176877	409288	109046
OAF	Q86UD1	Out at first protein homolog OS=Homo sapiens OX=9606 GN=OAF PE=2 SV=1	2	1.83238e+06	1.51658e+06	1.82165e+06	1.34542e+06	3.36342e+06	673140	2.00644e+06	1.39014e+06	1.96423e+06	1173477	2.37797e+06	2.20788e+06	1.00022e+06	2.95521e+06	1.91391e+06	1.0529e+06	1.70996e+06	831338	975882	1.76979e+06	1.30994e+06	1.64667e+06
LGALS3	P17931	Galectin-3 OS=Homo sapiens OX=9606 GN=LGALS3 PE=1 SV=5	2	369148	530845	495941	181516	501729	198160	455839	253325	241593	388334	563391	411652	523454	656670	434377	567447	587847	741655	243142	800464	166674	586719
CD14	P08571	Monocyte differentiation antigen CD14 OS=Homo sapiens OX=9606 GN=CD14 PE=1 SV=2	3	1.85703e+06	2.4117e+06	2.45234e+06	3.10715e+06	2.15658e+06	1.45945e+06	2.45224e+06	484603	1.72376e+06	1.16952e+06	784732	2.77993e+06	3.46719e+06	3.07926e+06	1.59796e+06	1.26251e+06	1.86183e+06	4.11303e+06	3.31305e+06	1.59253e+06	1.99133e+06	1.8383e+06
PSMA2	P25787	Proteasome subunit alpha type-2 OS=Homo sapiens OX=9606 GN=PSMA2 PE=1 SV=2	2	377743	618314	462485	190255	411244	217100	597720	184883	798691	427956	313290	173810	2.14958e+06	714096	432820	363288	485111	269993	344383	538400	675988	209477
ERP44	Q9BS26	Endoplasmic reticulum resident protein 44 OS=Homo sapiens OX=9606 GN=ERP44 PE=1 SV=1	3	1.66318e+06	1.52725e+06	1.32969e+06	876437	3.21159e+06	1.39626e+06	3.6581e+06	1.49419e+06	1.29732e+06	653197	845423	1.86963e+06	579646	1.2188e+06	1.08958e+06	1.26216e+06	1.83716e+06	1.76798e+06	3.22111e+06	1.4373e+06	1.60468e+06	1.25414e+06
SFTPB	P07988	Pulmonary surfactant-associated protein B OS=Homo sapiens OX=9606 GN=SFTPB PE=1 SV=3	2	152889	260472	76946.6	103363	68037.2	103224	238860	264947	15828.7	113173	118864	425642	63717.6	82059.2	152931	237395	178979	1.42153e+06	281202	92697.8	50724.2	43481.6
ECM2	O94769	Extracellular matrix protein 2 OS=Homo sapiens OX=9606 GN=ECM2 PE=2 SV=1	1	1.34903e+06	1.11802e+06	945586	320111	848780	708601	610924	326663	1.00047e+06	667550	782643	7.27899e+06	1.19193e+06	753512	597318	1.0468e+06	766039	1.26714e+06	2.57872e+06	805450	1.52012e+06	653166
C1QTNF3	Q9BXJ4	Complement C1q tumor necrosis factor-related protein 3 OS=Homo sapiens OX=9606 GN=C1QTNF3 PE=1 SV=1	1	558585	496582	406070	442236	246149	442669	263224	249871	838925	1.41839e+06	467257	811057	181754	475021	403294	358659	509511	787914	632433	790508	567474	259252
LGALS1	P09382	Galectin-1 OS=Homo sapiens OX=9606 GN=LGALS1 PE=1 SV=2	2	585048	551621	708887	279836	675062	530357	923685	312385	765493	436605	687640	530530	474208	649600	550479	801826	480541	840738	470476	351791	523134	373415
CTSF	Q9UBX1	Cathepsin F OS=Homo sapiens OX=9606 GN=CTSF PE=1 SV=1	3	259264	297181	295317	288903	294405	133680	251606	78161.9	226809	544127	276991	202640	143825	446758	410046	428469	166451	377448	138192	469433	236082	155112
LPL	P06858	Lipoprotein lipase OS=Homo sapiens OX=9606 GN=LPL PE=1 SV=1	2	716866	703436	893150	122888	1.69368e+06	908190	941307	282094	463020	589722	416848	857764	334420	414814	844283	763179	660348	2.26919e+06	363022	372950	325680	686479
BCHE	P06276	Cholinesterase OS=Homo sapiens OX=9606 GN=BCHE PE=1 SV=1	2	2.55505e+06	2.10333e+06	2.09543e+06	3.00603e+06	2.60989e+06	1.25146e+06	2.24789e+06	2.78394e+06	1.9505e+06	4.83485e+06	2.82906e+06	1.94142e+06	930406	2.96043e+06	1.84584e+06	2.77094e+06	2.43943e+06	2.37569e+06	2.8129e+06	897774	2.02966e+06	1.97019e+06
SPP2	Q13103	Secreted phosphoprotein 24 OS=Homo sapiens OX=9606 GN=SPP2 PE=1 SV=1	2	327904	914354	349422	263881	237624	136641	491361	601122	99476.9	147686	621561	330262	625731	65671.7	128995	164239	250194	131758	2.34581e+06	3.04088e+06	219642	2.17062e+06
TGFBR3	Q03167	Transforming growth factor beta receptor type 3 OS=Homo sapiens OX=9606 GN=TGFBR3 PE=1 SV=3	1	1.6605e+06	1.03575e+06	2.20039e+06	1.05267e+06	2.56174e+06	1.76993e+06	2.22904e+06	1.81625e+06	1.83841e+06	399921	517533	2.21913e+06	1.32858e+06	461101	386093	1.07419e+06	1.85862e+06	1.42756e+06	532400	724006	1.25066e+06	1.31431e+06
CRTAC1	Q9NQ79	Cartilage acidic protein 1 OS=Homo sapiens OX=9606 GN=CRTAC1 PE=1 SV=2	2	1.86649e+06	1.8379e+06	2.16116e+06	2.85249e+06	1.9878e+06	1.65866e+06	1.74336e+06	1.16829e+06	1.19605e+06	2.2668e+06	1.40348e+06	2.2268e+06	952449	1.7969e+06	1.69839e+06	3.75475e+06	1.83434e+06	1.52607e+06	1.99663e+06	1.19577e+06	1.703e+06	1.92072e+06
DNAJC3	Q13217	DnaJ homolog subfamily C member 3 OS=Homo sapiens OX=9606 GN=DNAJC3 PE=1 SV=1	2	480422	489961	594450	207048	751637	294903	492715	350050	967558	343314	404825	397724	345982	556955	274451	499053	481398	740443	564023	483937	677499	275875
SHH	Q15465	Sonic hedgehog protein OS=Homo sapiens OX=9606 GN=SHH PE=1 SV=1	2	2.05728e+06	1.61764e+06	1.76469e+06	888754	3.7608e+06	1.5727e+06	995538	1.54234e+06	2.89151e+06	4.16118e+06	1.99491e+06	1.00035e+06	773633	2.45069e+06	1.60985e+06	1.46108e+06	572600	1.31211e+06	2.9951e+06	1.41432e+06	1.28235e+06	2.30469e+06
CEMIP	Q8WUJ3	Cell migration-inducing and hyaluronan-binding protein OS=Homo sapiens OX=9606 GN=CEMIP PE=1 SV=2	1	9.05119e+06	7.24081e+06	3.54769e+06	8.07326e+06	9.0827e+06	1.0642e+07	7.11882e+06	6.29466e+06	1.98026e+07	6.92321e+06	1.36279e+07	5.39902e+06	2.53894e+06	5.61631e+06	7.6066e+06	1.30722e+07	6.64123e+06	1.14591e+07	8.27753e+06	3.7592e+06	8.79185e+06	4.64512e+06
BLVRB	P30043	Flavin reductase (NADPH) OS=Homo sapiens OX=9606 GN=BLVRB PE=1 SV=3	1	376404	444650	329405	133245	435288	611735	400606	274021	347812	393758	205061	633110	550252	532898	549124	501021	314880	543799	386765	319400	353379	394977
LMAN2	Q12907	Vesicular integral-membrane protein VIP36 OS=Homo sapiens OX=9606 GN=LMAN2 PE=1 SV=1	1	1.97848e+06	1.57724e+06	1.1439e+06	2.61506e+06	2.48527e+06	1.80573e+06	888269	483726	2.43201e+06	5.17093e+06	1.75324e+06	1.00663e+06	1.98021e+06	1.7749e+06	1.60734e+06	2.35812e+06	739540	1.00707e+06	911769	1.11985e+06	1.79199e+06	2.48162e+06
CDH1	P12830	Cadherin-1 OS=Homo sapiens OX=9606 GN=CDH1 PE=1 SV=3	1	860290	877767	1.51059e+06	322070	916605	416675	1.0189e+06	1.41895e+06	713874	878643	782189	624399	628518	956368	870488	724681	875623	1.52642e+06	992544	545134	885871	772016
DKK3	Q9UBP4	Dickkopf-related protein 3 OS=Homo sapiens OX=9606 GN=DKK3 PE=1 SV=2	1	372874	458898	416719	202295	373659	290662	411955	320020	363161	354370	313279	682621	181495	517412	408874	667582	520435	394499	512035	300184	518769	567695
OMD	Q99983	Osteomodulin OS=Homo sapiens OX=9606 GN=OMD PE=1 SV=1	2	1.6363e+06	1.55563e+06	1.68362e+06	1.04719e+06	1.58159e+06	1.0988e+06	2.26324e+06	2.8513e+06	1.35987e+06	1.24131e+06	2.04134e+06	1.19476e+06	1.32177e+06	1.47718e+06	1.21869e+06	1.43611e+06	1.56893e+06	1.06406e+06	2.81439e+06	1.49133e+06	1.33378e+06	1.83002e+06
FBN1	P35555	Fibrillin-1 OS=Homo sapiens OX=9606 GN=FBN1 PE=1 SV=4	1	3.02414e+06	3.46329e+06	2.87126e+06	2.26207e+06	2.5573e+06	2.42008e+06	4.64632e+06	2.38267e+06	3.69226e+06	3.39384e+06	2.40916e+06	3.60648e+06	5.1158e+06	2.96917e+06	4.86982e+06	3.09082e+06	2.98883e+06	3.54097e+06	2.09453e+06	3.23747e+06	3.9173e+06	2.80818e+06
LECT2	O14960	Leukocyte cell-derived chemotaxin-2 OS=Homo sapiens OX=9606 GN=LECT2 PE=1 SV=2	1	1.26764e+06	1.16302e+06	624934	1.13424e+06	1.35218e+06	778488	1.02376e+06	1.41578e+06	1.27455e+06	2295932	1.68996e+06	1.08658e+06	1.09288e+06	2.14368e+06	1.6011e+06	734270	640042	2.24699e+06	600379	528772	1.42211e+06	619996
FERMT3	Q86UX7	Fermitin family homolog 3 OS=Homo sapiens OX=9606 GN=FERMT3 PE=1 SV=1	1	119448	122111	153041	99346.7	127745	100024	92927.8	147414	241401	50086.3	91440.9	91048.2	144206	102681	55949.6	139808	75282.2	196105	185961	144422	79151.9	97548.9
IGKV4-1	P06312	Immunoglobulin kappa variable 4-1 OS=Homo sapiens OX=9606 GN=IGKV4-1 PE=1 SV=1	1	235252	289607	105231	265465	269829	199287	154414	191898	549623	184261	181654	250857	148472	157658	400411	250050	103895	632308	190909	763779	110697	137894
NOTCH3	Q9UM47	Neurogenic locus notch homolog protein 3 OS=Homo sapiens OX=9606 GN=NOTCH3 PE=1 SV=2	1	851932	968156	816558	778529	474851	753128	1.04463e+06	471138	943154	1.57366e+06	783400	880273	631997	621933	2.02907e+06	658484	800475	1.85022e+06	382483	786600	1.08641e+06	833884
MTBP	Q96DY7	Mdm2-binding protein OS=Homo sapiens OX=9606 GN=MTBP PE=1 SV=1	1	1.08536e+06	900271	1.09529e+06	1.24858e+06	706222	785818	757075	706090	1.69358e+06	1.67177e+06	1.46801e+06	721153	1.23257e+06	1.54675e+06	949009	999787	690468	767250	797241	322859	751283	945494
APOL3	O95236	Apolipoprotein L3 OS=Homo sapiens OX=9606 GN=APOL3 PE=1 SV=3	1	784812	1.16262e+06	452633	417840	487649	1.43647e+06	943010	1.33763e+06	900357	436211	767473	668849	2.48426e+06	1.56477e+06	845107	1.39223e+06	516668	1.35636e+06	754673	199096	1.88511e+06	627973
MAPK8IP2	Q13387	C-Jun-amino-terminal kinase-interacting protein 2 OS=Homo sapiens OX=9606 GN=MAPK8IP2 PE=1 SV=2	1	1.24446e+06	1.56284e+06	811559	1.7537e+06	1.82756e+06	1.09871e+06	709141	736013	1.97434e+06	1.66015e+06	1.41464e+06	458797	2.48228e+06	1.02525e+06	1.09409e+06	3.53941e+06	563565	2.6913e+06	410812	250745	1.33066e+06	2.24031e+06
SPTBN1	Q01082	Spectrin beta chain, non-erythrocytic 1 OS=Homo sapiens OX=9606 GN=SPTBN1 PE=1 SV=2	1	1.32362e+07	8.08806e+06	1.58737e+07	6.49207e+06	4.87354e+06	4.68515e+07	8.02773e+06	4.97241e+06	1.94559e+07	1.64868e+07	4.57546e+06	4.75303e+06	4.28277e+06	1.24754e+07	1.82792e+07	1.22951e+07	1.87494e+06	8.23047e+06	4.87485e+06	4.69125e+06	5.35786e+06	8.51882e+06
NBL1	P41271	Neuroblastoma suppressor of tumorigenicity 1 OS=Homo sapiens OX=9606 GN=NBL1 PE=1 SV=2	1	306326	347759	183856	244855	376313	424329	403729	144503	370357	248608	373070	293637	191151	407946	340988	456657	350430	389807	416853	312187	365335	246234
CTSA	P10619	Lysosomal protective protein OS=Homo sapiens OX=9606 GN=CTSA PE=1 SV=2	1	859549	804803	749500	131292	3.96751e+06	532264	497852	279183	1.05877e+06	175918	394067	809146	778009	721416	1.53601e+06	680217	585727	1.07804e+06	776961	613890	852908	424844
SLC2A2	P11168	Solute carrier family 2, facilitated glucose transporter member 2 OS=Homo sapiens OX=9606 GN=SLC2A2 PE=1 SV=1	1	3.85316e+07	2.18754e+07	1.25683e+08	6.02241e+07	2.24301e+07	2.97615e+07	1.84726e+07	9.16025e+06	1.6899e+07	17972392	4.40749e+07	4.06375e+07	1.4442e+07	2.73532e+07	1.85763e+07	2.7546e+07	4.19354e+07	2.61627e+07	2.59371e+07	5.9053e+06	1.56153e+07	1.52806e+07
ZC4H2	Q9NQZ6	Zinc finger C4H2 domain-containing protein OS=Homo sapiens OX=9606 GN=ZC4H2 PE=1 SV=1	1	1.41178e+06	1.73569e+06	1.28918e+06	788478	1.45473e+06	547394	1.75073e+06	2.4922e+06	1.3643e+06	811925	2.35889e+06	1.25998e+06	1.37511e+06	872040	1.05184e+06	1.3587e+06	1.05703e+06	776529	1.47204e+06	5.13055e+06	1.67151e+06	2.59152e+06
SEPTIN14	Q6ZU15	Septin-14 OS=Homo sapiens OX=9606 GN=SEPTIN14 PE=1 SV=2	1	1.61103e+06	1.43083e+06	2.00409e+06	923692	902118	2.18218e+06	1.15739e+06	1.61645e+06	1.61247e+06	1.07088e+06	1.41808e+06	3.22298e+06	1.97154e+06	1.2303e+06	1.39889e+06	1.16023e+06	1.0007e+06	653350	2.38732e+06	424309	2.00291e+06	2.07872e+06
PROZ	P22891	Vitamin K-dependent protein Z OS=Homo sapiens OX=9606 GN=PROZ PE=1 SV=2	1	589756	519096	563723	776854	496989	647902	375677	398085	855030	1.12172e+06	275112	386465	803326	728736	682358	546030	333358	689169	513362	308236	410708	175675
CHMP4B	Q9H444	Charged multivesicular body protein 4b OS=Homo sapiens OX=9606 GN=CHMP4B PE=1 SV=1	1	6.25381e+07	5.4474e+07	4.44007e+07	6.45287e+07	1.17158e+08	4.66272e+07	5.30481e+07	5.25507e+07	5.60676e+07	55396972	7.73986e+07	5.82038e+07	3.9565e+07	9.49495e+07	5.15848e+07	6.64413e+07	6.52112e+07	6.2751e+07	2.80478e+07	1.95303e+07	9.14371e+07	2.52222e+07
CHMP6	Q96FZ7	Charged multivesicular body protein 6 OS=Homo sapiens OX=9606 GN=CHMP6 PE=1 SV=3	1	233228	292858	236569	206066	419020	247493	245003	89484.7	261618	203288	121720	302023	424793	265000	224322	247030	313075	207559	265495	293552	390380	297369
AARS1	P49588	Alanine--tRNA ligase, cytoplasmic OS=Homo sapiens OX=9606 GN=AARS1 PE=1 SV=2	1	570665	568371	308781	902467	602709	575744	536208	321484	317538	947681	590452	603584	1.35235e+06	569702	304650	470018	386583	1.34191e+06	444220	148346	287556	378374
SIL1	Q9H173	Nucleotide exchange factor SIL1 OS=Homo sapiens OX=9606 GN=SIL1 PE=1 SV=1	1	249721	276405	240901	186108	289420	155251	540298	167540	289316	208385	164916	255077	373595	290571	179981	187352	228574	429403	360724	191978	249419	272456
KDM4B	O94953	Lysine-specific demethylase 4B OS=Homo sapiens OX=9606 GN=KDM4B PE=1 SV=4	1	1.17278e+06	1.41755e+06	761903	592512	1.81104e+06	1.59671e+06	1.05953e+06	1.33505e+06	1.74636e+06	549084	738086	1.53757e+06	2.27743e+06	1.25234e+06	1.0993e+06	1.24065e+06	1.36683e+06	738622	1.47071e+06	925402	1.37391e+06	2.43027e+06
PMFBP1	Q8TBY8	Polyamine-modulated factor 1-binding protein 1 OS=Homo sapiens OX=9606 GN=PMFBP1 PE=1 SV=3	1	3.60475e+06	3.44129e+06	2.57185e+06	3.06636e+06	3.38202e+06	4.04649e+06	3.83096e+06	3.9558e+06	3.57474e+06	4.3045e+06	3.8365e+06	3.47832e+06	3.59681e+06	3.47402e+06	3.82306e+06	3.08987e+06	2.52238e+06	2.57927e+06	3.89564e+06	4.59328e+06	3.45389e+06	3.3847e+06
